# Supplementary material for: The decoy SNARE Tomosyn sets tonic versus phasic release properties and is required for homeostatic synaptic plasticity
Source: eLife journal article supplement (doi:10.7554/elife.72841), 2021-10-29
Supplement: supp [file elife-72841-supp-v1.zip]

Archive with 21 entries (21 files):
- elife_poa_e72841_Transparent_Reporting_File.pdf
- elife_poa_e72841_Figure_2_figure_supplement_1.pdf
- elife_poa_e72841_Figure_3_figure_supplement_1.pdf
- elife_poa_e72841_Figure_4_figure_supplement_1.pdf
- elife_poa_e72841_Figure_7_figure_supplement_1.pdf
- elife_poa_e72841_Figure_8_figure_supplement_1.pdf
- elife_poa_e72841_Figure_1_source_data_1.xlsx
- elife_poa_e72841_Figure_1_source_data_2.pdf
- elife_poa_e72841_Figure_1_source_data_3.pdf
- elife_poa_e72841_Figure_2_source_data_1.xlsx
- elife_poa_e72841_Figure_2_figure_supplement_1_source_data_1.xlsx
- elife_poa_e72841_Figure_3_source_data_1.xlsx
- elife_poa_e72841_Figure_3_figure_supplement_1_source_data_1.xlsx
- elife_poa_e72841_Figure_4_source_data_1.xlsx
- elife_poa_e72841_Figure_4_figure_supplement_1_source_data_1.xlsx
- elife_poa_e72841_Figure_5_source_data_1.xlsx
- elife_poa_e72841_Figure_6_source_data_1.xlsx
- elife_poa_e72841_Figure_7_source_data_1.xlsx
- elife_poa_e72841_Figure_7_figure_supplement_1_source_data_1.xlsx
- elife_poa_e72841_Figure_8_source_data_1.xlsx
- elife_poa_e72841_Figure_8_figure_supplement_1_source_data_1.xlsx
