# Supplementary material for: The decoy SNARE Tomosyn sets tonic versus phasic release properties and is required for homeostatic synaptic plasticity
Source: eLife journal article supplement (doi:10.7554/elife.72841), 2021-10-29
Supplement: supp [file elife-72841-supp-v1.zip › elife_poa_e72841_Figure_1_source_data_1.xlsx]

## Sheet: Figure 1 G
7S/Tub
					Table Analyzed	7S/ Tub				Control	Tom
Control	Tom								Number of values	5	5
0.0851358	0.181624				Column B	Tom
0.0652444	0.136499				vs.	vs.			Minimum	0.04983	0.1365
0.0538453	0.208231				Column A	Control			25% Percentile	0.05184	0.1591
0.140516	0.234965								Median	0.06524	0.2082
0.0498312	0.30217				Unpaired t test				75% Percentile	0.1128	0.2686
					P value	0.0032			Maximum	0.1405	0.3022
					P value summary	**
					Significantly different (P < 0.05)?	Yes			Mean	0.07891	0.2127
					One- or two-tailed P value?	Two-tailed			Std. Deviation	0.03706	0.06183
					t, df	t=4.150, df=8			Std. Error of Mean	0.01658	0.02765
					How big is the difference?				Lower 95% CI	0.03289	0.1359
					Mean of column A	0.07891			Upper 95% CI	0.1249	0.2895
					Mean of column B	0.2127
					Difference between means (B - A) ± SEM	0.1338 ± 0.03224
					95% confidence interval	0.05944 to 0.2081
					R squared (eta squared)	0.6828
					F test to compare variances
					F, DFn, Dfd	2.783, 4, 4
					P value	0.3453
					P value summary	ns
					Significantly different (P < 0.05)?	No
					Data analyzed
					Sample size, column A	5
					Sample size, column B	5
