# Supplementary material for: The decoy SNARE Tomosyn sets tonic versus phasic release properties and is required for homeostatic synaptic plasticity
Source: eLife journal article supplement (doi:10.7554/elife.72841), 2021-10-29
Supplement: supp [file elife-72841-supp-v1.zip › elife_poa_e72841_Figure_2_figure_supplement_1_source_data_1.xlsx]

## Sheet: Figure 2 Supplemental 1 B
Control	TomFS1
-46.8755	-89.757
-59.01	-77.2421						Control	TomFS1
-76.6038	-115.028		Table Analyzed	Peak		Number of values	8	8
-62.8833	-116.191
-70.9728	-100.586		Column B	TomFS1		Minimum	-99.85	-121.2
-55.2366	-114.021		vs.	vs.		25% Percentile	-82.27	-115.9
-99.8527	-104.226		Column A	Control		Median	-66.93	-109.1
-84.1547	-121.215					75% Percentile	-56.18	-92.46
			Unpaired t test			Maximum	-46.88	-77.24
			P value	0.0006
			P value summary	***		Mean	-69.45	-104.8
			Significantly different (P < 0.05)?	Yes		Std. Deviation	17.15	15.08
			One- or two-tailed P value?	Two-tailed		Std. Error of Mean	6.062	5.333
			t, df	t=4.376, df=14
						Lower 95% CI	-83.78	-117.4
			How big is the difference?			Upper 95% CI	-55.11	-92.17
			Mean of column A	-69.45
			Mean of column B	-104.8
			Difference between means (B - A) ± SEM	-35.33 ± 8.074
			95% confidence interval	-52.65 to -18.02
			R squared (eta squared)	0.5777
			F test to compare variances
			F, DFn, Dfd	1.292, 7, 7
			P value	0.7439
			P value summary	ns
			Significantly different (P < 0.05)?	No
			Data analyzed
			Sample size, column A	8
			Sample size, column B	8

## Sheet: Figure 2 Supplemental 1 C
Control	TomFS1
-665.654	-1287.35
-735.48	-1026.03						Control	TomFS1
-961.535	-1386.37		Table Analyzed	Area		Number of values	8	8
-850.598	-1682.87
-966.727	-1479.62		Column B	TomFS1		Minimum	-1166	-1781
-683.478	-1780.84		vs.	vs.		25% Percentile	-989.2	-1663
-1166.06	-1472.57		Column A	Control		Median	-906.1	-1476
-996.694	-1605.12					75% Percentile	-696.5	-1312
			Unpaired t test			Maximum	-665.7	-1026
			P value	<0.0001
			P value summary	****		Mean	-878.3	-1465
			Significantly different (P < 0.05)?	Yes		Std. Deviation	175.6	238.3
			One- or two-tailed P value?	Two-tailed		Std. Error of Mean	62.09	84.26
			t, df	t=5.607, df=14
						Lower 95% CI	-1025	-1664
			How big is the difference?			Upper 95% CI	-731.5	-1266
			Mean of column A	-878.3
			Mean of column B	-1465
			Difference between means (B - A) ± SEM	-586.8 ± 104.7
			95% confidence interval	-811.3 to -362.3
			R squared (eta squared)	0.6919
			F test to compare variances
			F, DFn, Dfd	1.841, 7, 7
			P value	0.4391
			P value summary	ns
			Significantly different (P < 0.05)?	No
			Data analyzed
			Sample size, column A	8
			Sample size, column B	8

## Sheet: Figure 2 Supplemental 1 E
Control	TomFS1
3.33333	6.36667
5.76667	6.46667						Control	TomFS1
6.1	6.03333		Table Analyzed	Mini Freq		Number of values	8	8
2.76667	6.66667
4.16667	6.23333		Column B	TomFS1		Minimum	1.967	5.067
3.83333	5.06667		vs.	vs.		25% Percentile	2.417	5.833
1.96667	5.76667		Column A	Control		Median	3.583	6.3
2.3	14					75% Percentile	5.367	6.617
			Unpaired t test			Maximum	6.1	14
			P value	0.0118
			P value summary	*		Mean	3.779	7.075
			Significantly different (P < 0.05)?	Yes		Std. Deviation	1.521	2.842
			One- or two-tailed P value?	Two-tailed		Std. Error of Mean	0.5376	1.005
			t, df	t=2.892, df=14
						Lower 95% CI	2.508	4.699
			How big is the difference?			Upper 95% CI	5.05	9.451
			Mean of column A	3.779
			Mean of column B	7.075
			Difference between means (B - A) ± SEM	3.296 ± 1.140
			95% confidence interval	0.8518 to 5.740
			R squared (eta squared)	0.374
			F test to compare variances
			F, DFn, Dfd	3.493, 7, 7
			P value	0.121
			P value summary	ns
			Significantly different (P < 0.05)?	No
			Data analyzed
			Sample size, column A	8
			Sample size, column B	8
