# Supplementary material for: The decoy SNARE Tomosyn sets tonic versus phasic release properties and is required for homeostatic synaptic plasticity
Source: eLife journal article supplement (doi:10.7554/elife.72841), 2021-10-29
Supplement: supp [file elife-72841-supp-v1.zip › elife_poa_e72841_Figure_2_source_data_1.xlsx]

## Sheet: Figure 2 B
Ctrl	Tom	Tom/Def
-46.0054	-50.959	-98.597
-62.2924	-84.7006	-85.4978
-44.2414	-77.9107	-72.8187			Table Analyzed	EJC Peak																		Ctrl	Tom	Tom/Def
-65.8829	-107.782	-106.37			Data sets analyzed	A-C						Number of families	1										Number of values	17	18	18
-68.0664	-95.793	-142.446										Number of comparisons per family	3
-57.5915	-82.0558	-130.424			ANOVA summary							Alpha	0.05										Minimum	-70.79	-107.8	-142.4
-50.3801	-93.377	-123.883			F	53.73																	25% Percentile	-62.97	-95.44	-124.4
-52.154	-79.9486	-95.0383			P value	<0.0001						Tukey's multiple comparisons test	Mean Diff.	95.00% CI of diff.	Below threshold?	Summary	Adjusted P Value						Median	-55.3	-83.74	-111
-63.2739	-67.6078	-94.0075			P value summary	****						Ctrl vs. Tom	31.96	18.65 to 45.27	Yes	****	<0.0001	A-B					75% Percentile	-39.59	-76.12	-94.78
-70.7859	-92.8006	-96.543			Significant diff. among means (P < 0.05)?	Yes						Ctrl vs. Tom/Def	57.05	43.74 to 70.37	Yes	****	<0.0001	A-C					Maximum	-25.21	-50.96	-72.82
-62.6672	-70.7641	-78.9585			R squared	0.6825						Tom vs. Tom/Def	25.09	11.97 to 38.21	Yes	****	<0.0001	B-C
-61.6013	-89.1269	-130.251																					Mean	-51.78	-83.74	-108.8
-55.2968	-82.5255	-126.023			Brown-Forsythe test							Test details	Mean 1	Mean 2	Mean Diff.	SE of diff.	n1	n2	q	DF			Std. Deviation	14.52	14.33	19.42
-27.7418	-60.555	-104.182			F (DFn, DFd)	1.825 (2, 50)						Ctrl vs. Tom	-51.78	-83.74	31.96	5.511	17	18	8.201	50			Std. Error of Mean	3.522	3.378	4.578
-25.2112	-82.7841	-116.335			P value	0.1718						Ctrl vs. Tom/Def	-51.78	-108.8	57.05	5.511	17	18	14.64	50
-32.1639	-95.7024	-123.148			P value summary	ns						Tom vs. Tom/Def	-83.74	-108.8	25.09	5.432	18	18	6.533	50			Lower 95% CI	-59.25	-90.87	-118.5
-34.9309	-95.3587	-118.824			Are SDs significantly different (P < 0.05)?	No																	Upper 95% CI	-44.32	-76.61	-99.18
	-97.5967	-115.686
					Bartlett's test
					Bartlett's statistic (corrected)	2.036
					P value	0.3613
					P value summary	ns
					Are SDs significantly different (P < 0.05)?	No
					ANOVA table	SS	DF	MS	F (DFn, DFd)	P value
					Treatment (between columns)	28540	2	14270	F (2, 50) = 53.73	P<0.0001
					Residual (within columns)	13279	50	265.6
					Total	41819	52
					Data summary
					Number of treatments (columns)	3
					Number of values (total)	53

## Sheet: Figure 2 C
Control	TomNA1	TomNA1/Df(1)ED7161
-479.443	-586.522	-1236.38
-631.762	-902.316	-1024.55																					Control	TomNA1	TomNA1/Df(1)ED7161
-562.156	-963.199	-896.615			Table Analyzed	EJC Area						Number of families	1									Number of values	17	18	18
-959.627	-1230.51	-1510.88			Data sets analyzed	A-C						Number of comparisons per family	3
-943.163	-1300.43	-1936.64										Alpha	0.05									Minimum	-959.6	-1482	-2022
-826.01	-1187.9	-1927.84			ANOVA summary																	25% Percentile	-813	-1339	-1823
-663.242	-1475.39	-1888.55			F	44.19						Tukey's multiple comparisons test	Mean Diff.	95.00% CI of diff.	Below threshold?	Summary	Adjusted P Value					Median	-663.2	-1228	-1488
-680.03	-1224.99	-1286.38			P value	<0.0001						Control vs. TomNA1	496.1	282.3 to 710.0	Yes	****	<0.0001	A-B				75% Percentile	-495.7	-996.4	-1274
-800.022	-825.938	-1285.97			P value summary	****						Control vs. TomNA1/Df(1)ED7161	828.3	614.5 to 1042	Yes	****	<0.0001	A-C				Maximum	-364.4	-586.5	-896.6
-927.331	-1337.11	-1293.96			Significant diff. among means (P < 0.05)?	Yes						TomNA1 vs. TomNA1/Df(1)ED7161	332.2	121.4 to 543.0	Yes	**	0.0011	B-C
-784.344	-1013.67	-1134.07			R squared	0.6387																Mean	-670.7	-1167	-1499
-762.667	-1344.33	-2021.86										Test details	Mean 1	Mean 2	Mean Diff.	SE of diff.	n1	n2	q	DF		Std. Deviation	188	240.4	332.4
-629.904	-1240.58	-1801.54			Brown-Forsythe test							Control vs. TomNA1	-670.7	-1167	496.1	88.53	17	18	7.925	50		Std. Error of Mean	45.6	56.66	78.35
-419.475	-1007.46	-1550.89			F (DFn, DFd)	2.379 (2, 50)						Control vs. TomNA1/Df(1)ED7161	-670.7	-1499	828.3	88.53	17	18	13.23	50
-364.407	-1158.38	-1466.6			P value	0.103						TomNA1 vs. TomNA1/Df(1)ED7161	-1167	-1499	332.2	87.26	18	18	5.384	50		Lower 95% CI	-767.4	-1286	-1664
-456.296	-1300.59	-1743.07			P value summary	ns																Upper 95% CI	-574	-1047	-1334
-511.981	-1482.32	-1481.34			Are SDs significantly different (P < 0.05)?	No
	-1421.15	-1495.29
					Bartlett's test
					Bartlett's statistic (corrected)	5.23
					P value	0.0732
					P value summary	ns
					Are SDs significantly different (P < 0.05)?	No
					ANOVA table	SS	DF	MS	F (DFn, DFd)	P value
					Treatment (between columns)	6057141	2	3028570	F (2, 50) = 44.19	P<0.0001
					Residual (within columns)	3426496	50	68530
					Total	9483637	52
					Data summary
					Number of treatments (columns)	3
					Number of values (total)	53

## Sheet: Figure 2 E
Control	TomNA1	TomNA1/Df(1)ED7161
-0.466663	-0.58227	-0.47339
-0.466663	-0.56391	-0.38002																					Control	TomNA1	TomNA1/Df(1)ED7161
-0.434246	-0.57105	-0.56393		Table Analyzed	Mini Peak						Number of families	1										Number of values	16	18	18
-0.608582	-0.61726	-0.67456		Data sets analyzed	A-C						Number of comparisons per family	3
-0.615115	-0.56261	-0.55037									Alpha	0.05										Minimum	-0.8227	-0.7303	-0.7619
-0.731992	-0.52186	-0.62329		ANOVA summary																		25% Percentile	-0.6413	-0.5985	-0.6766
-0.822672	-0.60457	-0.69962		F	0.08973						Tukey's multiple comparisons test	Mean Diff.	95.00% CI of diff.	Below threshold?	Summary	Adjusted P Value						Median	-0.6104	-0.5743	-0.5657
-0.575069	-0.51651	-0.49852		P value	0.9143						Control vs. TomNA1	-0.01272	-0.08599 to 0.06055	No	ns	0.9077	A-B					75% Percentile	-0.4701	-0.5512	-0.511
-0.452192	-0.56066	-0.56756		P value summary	ns						Control vs. TomNA1/Df(1)ED7161	-0.00525	-0.07852 to 0.06802	No	ns	0.9836	A-C					Maximum	-0.4342	-0.4854	-0.38
-0.646152	-0.59652	-0.58899		Significant diff. among means (P < 0.05)?	No						TomNA1 vs. TomNA1/Df(1)ED7161	0.007473	-0.06361 to 0.07855	No	ns	0.9651	B-C
-0.612252	-0.48543	-0.71109		R squared	0.003649																	Mean	-0.5898	-0.5771	-0.5846
-0.480404	-0.59437	-0.50617									Test details	Mean 1	Mean 2	Mean Diff.	SE of diff.	n1	n2	q	DF			Std. Deviation	0.1082	0.05181	0.09704
-0.595751	-0.54755	-0.55804		Brown-Forsythe test							Control vs. TomNA1	-0.5898	-0.5771	-0.01272	0.03031	16	18	0.5935	49			Std. Error of Mean	0.02706	0.01221	0.02287
-0.682637	-0.5524	-0.63314		F (DFn, DFd)	3.201 (2, 49)						Control vs. TomNA1/Df(1)ED7161	-0.5898	-0.5846	-0.00525	0.03031	16	18	0.2449	49
-0.626612	-0.73027	-0.68256		P value	0.0494						TomNA1 vs. TomNA1/Df(1)ED7161	-0.5771	-0.5846	0.007473	0.02941	18	18	0.3593	49			Lower 95% CI	-0.6475	-0.6029	-0.6328
-0.620333	-0.61888	-0.76193		P value summary	*																	Upper 95% CI	-0.5322	-0.5513	-0.5363
	-0.57745	-0.53678		Are SDs significantly different (P < 0.05)?	Yes
	-0.58443	-0.51255
				Bartlett's test
				Bartlett's statistic (corrected)	8.501
				P value	0.0143
				P value summary	*
				Are SDs significantly different (P < 0.05)?	Yes
				ANOVA table	SS	DF	MS	F (DFn, DFd)	P value
				Treatment (between columns)	0.001397	2	0.0006985	F (2, 49) = 0.08973	P=0.9143
				Residual (within columns)	0.3814	49	0.007784
				Total	0.3828	51
				Data summary
				Number of treatments (columns)	3
				Number of values (total)	52

## Sheet: Figure 2 F
Control	TomNA1	TomNA1/Df(1)ED7161
-5.68366	-8.82678	-7.035
-5.68366	-8.16544	-5.66756																						Control	TomNA1	TomNA1/Df(1)ED7161
-6.92024	-8.77818	-9.5671		Table Analyzed	Mini Area							Number of families	1										Number of values	16	18	18
-10.7404	-9.4715	-10.9432		Data sets analyzed	A-C							Number of comparisons per family	3
-10.3719	-8.91455	-8.74468										Alpha	0.05										Minimum	-15.2	-11.97	-12.9
-11.8427	-8.6709	-11.3288		ANOVA summary																			25% Percentile	-11.58	-9.735	-11.49
-15.1965	-9.39059	-12.2803		F	0.1636							Tukey's multiple comparisons test	Mean Diff.	95.00% CI of diff.	Below threshold?	Summary	Adjusted P Value						Median	-10.12	-9.172	-9.476
-9.05553	-9.81885	-8.5236		P value	0.8496							Control vs. TomNA1	-0.3469	-1.965 to 1.271	No	ns	0.8629	A-B					75% Percentile	-7.294	-8.751	-8.353
-8.41533	-8.57351	-8.90627		P value summary	ns							Control vs. TomNA1/Df(1)ED7161	-0.04598	-1.664 to 1.572	No	ns	0.9974	A-C					Maximum	-5.684	-8.165	-5.668
-10.6328	-11.2712	-10.0938		Significant diff. among means (P < 0.05)?	No							TomNA1 vs. TomNA1/Df(1)ED7161	0.3009	-1.269 to 1.871	No	ns	0.8887	B-C
-9.63399	-8.26537	-11.8827		R squared	0.006632																		Mean	-9.743	-9.396	-9.697
-6.69176	-10.3714	-8.56154										Test details	Mean 1	Mean 2	Mean Diff.	SE of diff.	n1	n2	q	DF			Std. Deviation	2.591	0.9879	2.011
-11.4899	-9.20893	-9.38458		Brown-Forsythe test								Control vs. TomNA1	-9.743	-9.396	-0.3469	0.6695	16	18	0.7327	49			Std. Error of Mean	0.6477	0.2328	0.4741
-12.0498	-9.13568	-11.3685		F (DFn, DFd)	5.743 (2, 49)							Control vs. TomNA1/Df(1)ED7161	-9.743	-9.697	-0.04598	0.6695	16	18	0.09712	49
-9.87263	-11.9682	-11.8586		P value	0.0057							TomNA1 vs. TomNA1/Df(1)ED7161	-9.396	-9.697	0.3009	0.6495	18	18	0.6551	49			Lower 95% CI	-11.12	-9.887	-10.7
-11.6061	-9.58727	-12.8987		P value summary	**																		Upper 95% CI	-8.362	-8.905	-8.697
	-9.00438	-7.84222		Are SDs significantly different (P < 0.05)?	Yes
	-9.70655	-7.65806
				Bartlett's test
				Bartlett's statistic (corrected)	13.11
				P value	0.0014
				P value summary	**
				Are SDs significantly different (P < 0.05)?	Yes
				ANOVA table	SS	DF	MS	F (DFn, DFd)	P value
				Treatment (between columns)	1.242	2	0.6211	F (2, 49) = 0.1636	P=0.8496
				Residual (within columns)	186	49	3.797
				Total	187.3	51
				Data summary
				Number of treatments (columns)	3
				Number of values (total)	52

## Sheet: Figure 2 G
Control	TomNA1	TomNA1/Df(1)ED7161
74.7915	87.1944	174.278
101.27	144.929	151.124																				Control	TomNA1	TomNA1/Df(1)ED7161
71.9238	133.311	128.713		Table Analyzed	QC Peak						Number of families	1									Number of values	17	18	18
107.107	184.422	188.018		Data sets analyzed	A-C						Number of comparisons per family	3
110.656	163.908	251.785									Alpha	0.05									Minimum	40.99	87.19	128.7
93.6272	140.403	230.535		ANOVA summary																	25% Percentile	64.36	130.3	167.5
81.9035	159.774	218.973		F	65.4						Tukey's multiple comparisons test	Mean Diff.	95.00% CI of diff.	Below threshold?	Summary	Adjusted P Value					Median	89.9	143.3	196.3
84.7874	136.798	167.988		P value	<0.0001						Control vs. TomNA1	-59.11	-81.97 to -36.24	Yes	****	<0.0001	A-B				75% Percentile	102.4	163.3	219.9
102.865	115.682	166.166		P value summary	****						Control vs. TomNA1/Df(1)ED7161	-108.2	-131.1 to -85.33	Yes	****	<0.0001	A-C				Maximum	115.1	184.4	251.8
115.078	158.788	170.648		Significant diff. among means (P < 0.05)?	Yes						TomNA1 vs. TomNA1/Df(1)ED7161	-49.09	-71.62 to -26.55	Yes	****	<0.0001	B-C
101.879	121.082	139.565		R squared	0.7234																Mean	84.18	143.3	192.4
100.146	152.502	230.229									Test details	Mean 1	Mean 2	Mean Diff.	SE of diff.	n1	n2	q	DF		Std. Deviation	23.61	24.53	34.33
89.8967	141.207	222.756		Brown-Forsythe test							Control vs. TomNA1	84.18	143.3	-59.11	9.467	17	18	8.83	50		Std. Error of Mean	5.726	5.781	8.091
45.1002	103.614	184.15		F (DFn, DFd)	2.434 (2, 50)						Control vs. TomNA1/Df(1)ED7161	84.18	192.4	-108.2	9.467	17	18	16.16	50
40.9862	141.649	205.631		P value	0.098						TomNA1 vs. TomNA1/Df(1)ED7161	143.3	192.4	-49.09	9.331	18	18	7.44	50		Lower 95% CI	72.04	131.1	175.3
52.2892	163.753	217.674		P value summary	ns																Upper 95% CI	96.32	155.5	209.4
56.7876	163.165	210.031		Are SDs significantly different (P < 0.05)?	No
	166.995	204.484
				Bartlett's test
				Bartlett's statistic (corrected)	2.929
				P value	0.2312
				P value summary	ns
				Are SDs significantly different (P < 0.05)?	No
				ANOVA table	SS	DF	MS	F (DFn, DFd)	P value
				Treatment (between columns)	102484	2	51242	F (2, 50) = 65.40	P<0.0001
				Residual (within columns)	39177	50	783.5
				Total	141661	52
				Data summary
				Number of treatments (columns)	3
				Number of values (total)	53

## Sheet: Figure 2 H
Control	TomNA1	TomNA1/Df(1)ED7161
46.8985	63.6906	130.477
61.7981	97.9827	108.122																				Control	TomNA1	TomNA1/Df(1)ED7161
54.9893	104.594	94.6212		Table Analyzed	QC Area						Number of families	1									Number of values	17	18	18
93.8694	133.621	159.446		Data sets analyzed	A-C						Number of comparisons per family	3
92.2589	141.214	204.377									Alpha	0.05									Minimum	35.65	63.69	94.62
80.7992	128.994	203.448		ANOVA summary																	25% Percentile	48.49	108.2	134.4
64.8774	160.213	199.302		F	50.84						Tukey's multiple comparisons test	Mean Diff.	95.00% CI of diff.	Below threshold?	Summary	Adjusted P Value					Median	64.88	133.3	157.1
66.5196	133.022	135.754		P value	<0.0001						Control vs. TomNA1	-61.1	-83.59 to -38.60	Yes	****	<0.0001	A-B				75% Percentile	79.53	145.4	192.4
78.2571	89.6888	135.71		P value summary	****						Control vs. TomNA1/Df(1)ED7161	-92.59	-115.1 to -70.09	Yes	****	<0.0001	A-C				Maximum	93.87	161	213.4
90.7103	145.197	136.554		Significant diff. among means (P < 0.05)?	Yes						TomNA1 vs. TomNA1/Df(1)ED7161	-31.49	-53.66 to -9.317	Yes	**	0.0034	B-C
76.7235	110.075	119.68		R squared	0.6704																Mean	65.61	126.7	158.2
74.603	145.981	213.37									Test details	Mean 1	Mean 2	Mean Diff.	SE of diff.	n1	n2	q	DF		Std. Deviation	18.39	26.1	35.08
61.6164	134.715	190.119		Brown-Forsythe test							Control vs. TomNA1	65.61	126.7	-61.1	9.313	17	18	9.278	50		Std. Error of Mean	4.46	6.153	8.269
41.0325	109.4	163.668		F (DFn, DFd)	2.706 (2, 50)						Control vs. TomNA1/Df(1)ED7161	65.61	158.2	-92.59	9.313	17	18	14.06	50
35.6458	125.789	154.773		P value	0.0766						TomNA1 vs. TomNA1/Df(1)ED7161	126.7	158.2	-31.49	9.179	18	18	4.851	50		Lower 95% CI	56.15	113.7	140.7
44.6343	141.231	183.949		P value summary	ns																Upper 95% CI	75.06	139.7	175.6
50.0813	160.965	156.328		Are SDs significantly different (P < 0.05)?	No
	154.323	157.8
				Bartlett's test
				Bartlett's statistic (corrected)	6.337
				P value	0.0421
				P value summary	*
				Are SDs significantly different (P < 0.05)?	Yes
				ANOVA table	SS	DF	MS	F (DFn, DFd)	P value
				Treatment (between columns)	77108	2	38554	F (2, 50) = 50.84	P<0.0001
				Residual (within columns)	37917	50	758.3
				Total	115025	52
				Data summary
				Number of treatments (columns)	3
				Number of values (total)	53

## Sheet: Figure 2 J
Control	Tomosyn
-158.935	-179.826
-195.822	-214.656						Control	Tomosyn
-192.397	-166.423		Table Analyzed	Peak		Number of values	24	24
-214.552	-221.723
-157.784	-219.517		Column B	Tomosyn		Minimum	-237.7	-249.4
-203.786	-190.601		vs.	vs.		25% Percentile	-202.2	-221.2
-152.578	-183.519		Column A	Control		Median	-174.4	-197.1
-237.667	-174.818					75% Percentile	-161	-184.5
-176.478	-193.011		Unpaired t test			Maximum	-130.2	-166.4
-130.193	-204.737		P value	0.0036
-174.682	-203.624		P value summary	**		Mean	-181	-203.2
-221.595	-185.715		Significantly different (P < 0.05)?	Yes		Std. Deviation	26.03	24.24
-197.321	-249.426		One- or two-tailed P value?	Two-tailed		Std. Error of Mean	5.313	4.948
-167.073	-185.256		t, df	t=3.065, df=46
-172.949	-215.037					Lower 95% CI	-192	-213.5
-154.307	-194.27		How big is the difference?			Upper 95% CI	-170	-193
-147.468	-172.906		Mean of column A	-181
-172.904	-199.934		Mean of column B	-203.2
-212.604	-189.316		Difference between means (B - A) ± SEM	-22.26 ± 7.261
-174.129	-247.673		95% confidence interval	-36.87 to -7.640
-180.517	-223.062		R squared (eta squared)	0.1696
-205.151	-242.646
-172.036	-235.249		F test to compare variances
-170.146	-184.265		F, DFn, Dfd	1.153, 23, 23
			P value	0.7358
			P value summary	ns
			Significantly different (P < 0.05)?	No
			Data analyzed
			Sample size, column A	24
			Sample size, column B	24

## Sheet: Figure 2 K
Control	Tomosyn
-1170.87	-1590.48
-1314.72	-1977.41						Control	Tomosyn
-1962.16	-1391.73		Table Analyzed	Area		Number of values	24	24
-2264.14	-2115.96
-1273.8	-2032.74		Column B	Tomosyn		Minimum	-2264	-3229
-1718.52	-1847.96		vs.	vs.		25% Percentile	-1783	-2464
-1099.07	-1545.61		Column A	Control		Median	-1372	-2134
-1854.24	-1472.61					75% Percentile	-1226	-1789
-1790.56	-2203.1		Unpaired t test			Maximum	-1099	-1392
-1129.37	-2980.98		P value	<0.0001
-1564.17	-3228.97		P value summary	****		Mean	-1496	-2140
-1306.36	-1968.95		Significantly different (P < 0.05)?	Yes		Std. Deviation	326.3	479.6
-1253.11	-2810.27		One- or two-tailed P value?	Two-tailed		Std. Error of Mean	66.6	97.9
-1133.61	-2151.41		t, df	t=5.435, df=46
-1284.58	-2538.14					Lower 95% CI	-1634	-2342
-1217.29	-2385.22		How big is the difference?			Upper 95% CI	-1358	-1937
-1184.06	-1769.19		Mean of column A	-1496
-1500.11	-2205.53		Mean of column B	-2140
-1428.66	-1876.81		Difference between means (B - A) ± SEM	-643.6 ± 118.4
-1285.53	-2355.01		95% confidence interval	-881.9 to -405.2
-1936.9	-2256.95		R squared (eta squared)	0.3911
-1831.07	-2582.17
-1640.06	-2489.98		F test to compare variances
-1760.45	-1571.77		F, DFn, Dfd	2.161, 23, 23
			P value	0.071
			P value summary	ns
			Significantly different (P < 0.05)?	No
			Data analyzed
			Sample size, column A	24
			Sample size, column B	24

## Sheet: Figure 2 M
Ctrl	Tom
12.7	13.7
10.4	13.8							Ctrl	Tom
15.7	13.4		Table Analyzed	Time to 90%			Number of values	24	24
18.4	14.3
13.6	14.6		Column B	Tom			Minimum	9.6	13.4
14.5	14.9		vs.	vs.			25% Percentile	12.1	14.68
12.1	13.5		Column A	Ctrl			Median	13.85	16.95
11.9	15.3						75% Percentile	15.65	18.3
15.8	23.4		Unpaired t test				Maximum	18.4	28
14.3	22.2		P value	0.0002
14.5	28		P value summary	***			Mean	13.79	17.19
9.6	18.3		Significantly different (P < 0.05)?	Yes			Std. Deviation	2.308	3.441
10.9	17.1		One- or two-tailed P value?	Two-tailed			Std. Error of Mean	0.4711	0.7025
13	18.3		t, df	t=4.025, df=46
14.1	19.1						Lower 95% CI	12.81	15.74
12.6	18.8		How big is the difference?				Upper 95% CI	14.76	18.64
13	16.7		Mean of column A	13.79
15.5	17.1		Mean of column B	17.19
10.8	17.3		Difference between means (B - A) ± SEM	3.404 ± 0.8458
12.1	15.3		95% confidence interval	1.702 to 5.107
17.7	17		R squared (eta squared)	0.2604
15.1	18.1
16	16.9		F test to compare variances
16.6	15.5		F, DFn, Dfd	2.223, 23, 23
			P value	0.0613
			P value summary	ns
			Significantly different (P < 0.05)?	No
			Data analyzed
			Sample size, column A	24
			Sample size, column B	24

## Sheet: Figure 2 O
Control	TomNA1	TomNA1/Df(1)ED7161
2.03302	6.84186	10.2
1.87164	8.56553	5.56668																				Control	TomNA1	TomNA1/Df(1)ED7161
1.53397	5.93975	9.03336		Table Analyzed	Mini Freq						Number of families	1									Number of values	16	18	18
2.63266	9.30704	14.3667		Data sets analyzed	A-C						Number of comparisons per family	3
2.69783	11.3238	19.7001									Alpha	0.05									Minimum	1.534	4.752	5.567
3.36903	13.9089	8.50003		ANOVA summary																	25% Percentile	1.912	7.835	9.001
5.38889	4.75248	10.4		F	57.41						Tukey's multiple comparisons test	Mean Diff.	95.00% CI of diff.	Below threshold?	Summary	Adjusted P Value					Median	2.547	9.783	10.19
1.69827	6.82616	9.70003		P value	<0.0001						Control vs. TomNA1	-6.821	-8.796 to -4.846	Yes	****	<0.0001	A-B				75% Percentile	3.263	11.34	12.72
2.46215	8.7643	10		P value summary	****						Control vs. TomNA1/Df(1)ED7161	-8.269	-10.24 to -6.294	Yes	****	<0.0001	A-C				Maximum	5.389	13.91	19.7
3.75463	11.9048	12.2052		Significant diff. among means (P < 0.05)?	Yes						TomNA1 vs. TomNA1/Df(1)ED7161	-1.448	-3.364 to 0.4684	No	ns	0.1718	B-C
3.16667	8.16669	8.90411		R squared	0.7009																Mean	2.701	9.522	10.97
1.69584	10.2667	10.8936									Test details	Mean 1	Mean 2	Mean Diff.	SE of diff.	n1	n2	q	DF		Std. Deviation	0.9742	2.372	3.137
2.93246	11.4	10.1889		Brown-Forsythe test							Control vs. TomNA1	2.701	9.522	-6.821	0.8172	16	18	11.8	49		Std. Error of Mean	0.2436	0.559	0.7395
3.2947	9.40003	10.9		F (DFn, DFd)	3.240 (2, 49)						Control vs. TomNA1/Df(1)ED7161	2.701	10.97	-8.269	0.8172	16	18	14.31	49
2.3786	11	14.2807		P value	0.0477						TomNA1 vs. TomNA1/Df(1)ED7161	9.522	10.97	-1.448	0.7928	18	18	2.582	49		Lower 95% CI	2.182	8.343	9.41
2.30643	11.3	14.3878		P value summary	*																Upper 95% CI	3.22	10.7	12.53
	10.1667	8.36735		Are SDs significantly different (P < 0.05)?	Yes
	11.5667	9.86486
				Bartlett's test
				Bartlett's statistic (corrected)	16.99
				P value	0.0002
				P value summary	***
				Are SDs significantly different (P < 0.05)?	Yes
				ANOVA table	SS	DF	MS	F (DFn, DFd)	P value
				Treatment (between columns)	649.5	2	324.7	F (2, 49) = 57.41	P<0.0001
				Residual (within columns)	277.2	49	5.657
				Total	926.6	51
				Data summary
				Number of treatments (columns)	3
				Number of values (total)	52

[truncated: 4 more sheets: Figure 2 P, Figure 2 Q, Figure 2 S, Sheet1]
