# Supplementary material for: The decoy SNARE Tomosyn sets tonic versus phasic release properties and is required for homeostatic synaptic plasticity
Source: eLife journal article supplement (doi:10.7554/elife.72841), 2021-10-29
Supplement: supp [file elife-72841-supp-v1.zip › elife_poa_e72841_Figure_3_figure_supplement_1_source_data_1.xlsx]

## Sheet: Figure 3 Supplemental 1 A
C155	C155 x Tom 13A	C155 x Tom 13A∆	C155 x Tom 13B	C155 x Tom 13B∆	C155 x Tom SNARE
-546.426	-503.667	-714.092	-901.841	-781.783	-817.652
-899.536	-618.806	-1161.16	-823.618	-946.753	-754.541																				C155	C155 x Tom 13A	C155 x Tom 13A∆	C155 x Tom 13B	C155 x Tom 13B∆	C155 x Tom SNARE
-1166.71	-455.963	-1192.8	-1106.61	-892.18	-1009.91		Table Analyzed	Overexpression Area						Number of families	1									Number of values	8	8	8	7	9	8
-808.17	-537.246	-901.633	-851.376	-653.983	-1280.9		Data sets analyzed	A-F						Number of comparisons per family	5
-1155.28	-722.935	-1098	-912.975	-545.015	-1009.06									Alpha	0.05									Minimum	-1167	-722.9	-1229	-1107	-946.8	-1281
-730.049	-655.679	-1228.75	-786.748	-422.07	-1224.84		ANOVA summary																	25% Percentile	-1111	-646.5	-1191	-913	-837	-1171
-534.242	-573.279	-1187.44	-749.247	-529.808	-518.448		F	5.863						Dunnett's multiple comparisons test	Mean Diff.	95.00% CI of diff.	Below threshold?	Summary	Adjusted P Value	A-?				Median	-853.9	-555.3	-1130	-851.4	-654	-913.4
-977.619	-484.11	-808.403		-675.89	-558.401		P value	0.0003						C155 vs. C155 x Tom 13A	-283.3	-541.8 to -24.83	Yes	*	0.0272	B	C155 x Tom 13A			75% Percentile	-592.3	-489	-831.7	-786.7	-537.4	-607.4
				-619.561			P value summary	***						C155 vs. C155 x Tom 13A∆	184.3	-74.18 to 442.7	No	ns	0.2388	C	C155 x Tom 13A∆			Maximum	-534.2	-456	-714.1	-749.2	-422.1	-518.4
							Significant diff. among means (P < 0.05)?	Yes						C155 vs. C155 x Tom 13B	23.81	-243.7 to 291.3	No	ns	0.9996	D	C155 x Tom 13B
							R squared	0.411						C155 vs. C155 x Tom 13B∆	-178.1	-429.3 to 73.04	No	ns	0.2431	E	C155 x Tom 13B∆			Mean	-852.3	-569	-1037	-876.1	-674.1	-896.7
														C155 vs. C155 x Tom SNARE	44.47	-214.0 to 302.9	No	ns	0.989	F	C155 x Tom SNARE			Std. Deviation	245	91.78	199.2	117.3	172.4	284
							Brown-Forsythe test																	Std. Error of Mean	86.62	32.45	70.41	44.35	57.48	100.4
							F (DFn, DFd)	2.501 (5, 42)						Test details	Mean 1	Mean 2	Mean Diff.	SE of diff.	n1	n2	q	DF
							P value	0.0454						C155 vs. C155 x Tom 13A	-852.3	-569	-283.3	98.86	8	8	2.866	42		Lower 95% CI	-1057	-645.7	-1203	-984.6	-806.7	-1134
							P value summary	*						C155 vs. C155 x Tom 13A∆	-852.3	-1037	184.3	98.86	8	8	1.864	42		Upper 95% CI	-647.4	-492.2	-870	-767.5	-541.6	-659.3
							Are SDs significantly different (P < 0.05)?	Yes						C155 vs. C155 x Tom 13B	-852.3	-876.1	23.81	102.3	8	7	0.2326	42
														C155 vs. C155 x Tom 13B∆	-852.3	-674.1	-178.1	96.08	8	9	1.854	42
							Bartlett's test							C155 vs. C155 x Tom SNARE	-852.3	-896.7	44.47	98.86	8	8	0.4498	42
							Bartlett's statistic (corrected)	10.44
							P value	0.0637
							P value summary	ns
							Are SDs significantly different (P < 0.05)?	No
							ANOVA table	SS	DF	MS	F (DFn, DFd)	P value
							Treatment (between columns)	1146014	5	229203	F (5, 42) = 5.863	P=0.0003
							Residual (within columns)	1642009	42	39095
							Total	2788023	47
							Data summary
							Number of treatments (columns)	6
							Number of values (total)	48

## Sheet: Figure 3 Supplemental 1 B
C155	C155 x Tom 13A	C155 x Tom 13A∆	C155 x Tom 13B	C155 x Tom 13B∆	C155 x Tom SNARE
3	1.36667	3.4	1.7	2.66667	3.53333
2.13333	1.7	3.56667	1.2	2.1	2.96667																				C155	C155 x Tom 13A	C155 x Tom 13A∆	C155 x Tom 13B	C155 x Tom 13B∆	C155 x Tom SNARE
2.93333	1.56667	2.86667	2.7	1.76667	1.9		Table Analyzed	Overexpression Mini						Number of families	1									Number of values	8	8	8	7	8	8
2.46667	1.5	4.7	3.13333	1.46667	1.66667		Data sets analyzed	A-F						Number of comparisons per family	5
2.76667	3.06667	3.43333	1.9	1.56667	4.1									Alpha	0.05									Minimum	2	0.9667	2.867	1.2	1.467	1.667
5	2.86667	5.16667	1.9	2.73333	4.56667		ANOVA summary																	25% Percentile	2.217	1.367	3.408	1.7	1.517	2.167
3.7	1.36667	3.63333	2.83333	1.7	3.8		F	7.789						Dunnett's multiple comparisons test	Mean Diff.	95.00% CI of diff.	Below threshold?	Summary	Adjusted P Value	A-?				Median	2.85	1.533	3.5	1.9	1.733	3.567
2	0.966667	3.43333		1.5	3.6		P value	<0.0001						C155 vs. C155 x Tom 13A	1.2	0.1423 to 2.258	Yes	*	0.0211	B	C155 x Tom 13A			75% Percentile	3.525	2.575	4.433	2.833	2.525	4.025
							P value summary	****						C155 vs. C155 x Tom 13A∆	-0.775	-1.833 to 0.2827	No	ns	0.2176	C	C155 x Tom 13A∆			Maximum	5	3.067	5.167	3.133	2.733	4.567
							Significant diff. among means (P < 0.05)?	Yes						C155 vs. C155 x Tom 13B	0.8048	-0.2901 to 1.900	No	ns	0.2151	D	C155 x Tom 13B
							R squared	0.4871						C155 vs. C155 x Tom 13B∆	1.062	0.004791 to 2.120	Yes	*	0.0486	E	C155 x Tom 13B∆			Mean	3	1.8	3.775	2.195	1.938	3.267
														C155 vs. C155 x Tom SNARE	-0.2667	-1.324 to 0.7910	No	ns	0.9458	F	C155 x Tom SNARE			Std. Deviation	0.9699	0.7528	0.7611	0.7014	0.511	1.026
							Brown-Forsythe test																	Std. Error of Mean	0.3429	0.2661	0.2691	0.2651	0.1807	0.3627
							F (DFn, DFd)	0.3898 (5, 41)						Test details	Mean 1	Mean 2	Mean Diff.	SE of diff.	n1	n2	q	DF
							P value	0.8529						C155 vs. C155 x Tom 13A	3	1.8	1.2	0.4039	8	8	2.971	41		Lower 95% CI	2.189	1.171	3.139	1.547	1.51	2.409
							P value summary	ns						C155 vs. C155 x Tom 13A∆	3	3.775	-0.775	0.4039	8	8	1.919	41		Upper 95% CI	3.811	2.429	4.411	2.844	2.365	4.124
							Are SDs significantly different (P < 0.05)?	No						C155 vs. C155 x Tom 13B	3	2.195	0.8048	0.4181	8	7	1.925	41
														C155 vs. C155 x Tom 13B∆	3	1.938	1.062	0.4039	8	8	2.631	41
							Bartlett's test							C155 vs. C155 x Tom SNARE	3	3.267	-0.2667	0.4039	8	8	0.6602	41
							Bartlett's statistic (corrected)	3.804
							P value	0.578
							P value summary	ns
							Are SDs significantly different (P < 0.05)?	No
							ANOVA table	SS	DF	MS	F (DFn, DFd)	P value
							Treatment (between columns)	25.41	5	5.083	F (5, 41) = 7.789	P<0.0001
							Residual (within columns)	26.75	41	0.6526
							Total	52.17	46
							Data summary
							Number of treatments (columns)	6
							Number of values (total)	47
