# Supplementary material for: The decoy SNARE Tomosyn sets tonic versus phasic release properties and is required for homeostatic synaptic plasticity
Source: eLife journal article supplement (doi:10.7554/elife.72841), 2021-10-29
Supplement: supp [file elife-72841-supp-v1.zip › elife_poa_e72841_Figure_3_source_data_1.xlsx]

## Sheet: Figure 3 A
C155	C155,Tom	C155,Tom x Tom 13A	C155,Tom x Tom 13A∆	C155,Tom x Tom 13B	C155,Tom x Tom 13B∆	C155,Tom x Tom SNARE	CT x 13A scaffold and SNARE
-546.426	-1944.58	-764.95	-1637.72	-662.712	-1851.9	-1078.84	-1709
-899.536	-1717.69	-755.585	-1674.09	-860.701	-2335.69	-1711.98	-1640.22																					C155	C155,Tom	C155,Tom x Tom 13A	C155,Tom x Tom 13A∆	C155,Tom x Tom 13B	C155,Tom x Tom 13B∆	C155,Tom x Tom SNARE	CT x 13A scaffold and SNARE
-1166.71	-2262.06	-554.798	-1412.13	-904.529	-1459.19	-1436.67	-860.223		Table Analyzed	Copy of Rescue Area							Number of families	1									Number of values	8	9	8	8	8	9	9	9
-808.17	-1546.46	-877.689	-1421.76	-896.567	-1862.98	-1455.69	-1776.71		Data sets analyzed	A-H							Number of comparisons per family	10
-1155.28	-2270.76	-396.922	-1846.62	-1366.02	-1515.93	-1533.48	-2058.99										Alpha	0.05									Minimum	-1167	-2271	-1012	-2262	-1366	-2336	-1814	-2059
-730.049	-2196.53	-1012.28	-2040.21	-1280	-1447.02	-1487.79	-1302.33		ANOVA summary																		25% Percentile	-1111	-2229	-849.5	-1992	-1266	-1864	-1689	-1743
-534.242	-2047.69	-423.786	-1515.54	-1222.48	-1667.16	-1665.13	-1639.46		F	22.64							Šídák's multiple comparisons test	Mean Diff.	95.00% CI of diff.	Below threshold?	Summary	Adjusted P Value					Median	-853.9	-1945	-655.2	-1656	-1004	-1678	-1488	-1639
-977.619	-1551.69	-511.289	-2262.31	-1102.5	-1678.1	-1814.34	-1163.81		P value	<0.0001							C155 vs. C155,Tom x Tom 13A	-190.1	-594.1 to 213.9	No	ns	0.8567	A-C				75% Percentile	-592.3	-1623	-445.7	-1445	-869.7	-1488	-1412	-1185
	-1694.52				-1864.04	-1387.93	-1206.99		P value summary	****							C155 vs. C155,Tom x Tom 13B	184.7	-219.3 to 588.7	No	ns	0.8769	A-E				Maximum	-534.2	-1546	-396.9	-1412	-662.7	-1447	-1079	-860.2
									Significant diff. among means (P < 0.05)?	Yes							C155,Tom vs. C155,Tom x Tom 13A∆	-188.4	-581.0 to 204.3	No	ns	0.8417	B-D
									R squared	0.7254							C155,Tom vs. C155,Tom x Tom 13B∆	-172.2	-553.1 to 208.7	No	ns	0.884	B-F				Mean	-852.3	-1915	-662.2	-1726	-1037	-1742	-1508	-1484
																	C155 vs. C155,Tom x Tom SNARE	655.7	263.1 to 1048	Yes	****	<0.0001	A-G				Std. Deviation	245	295.8	223.5	304	243.3	278.8	214.4	373.6
									Brown-Forsythe test								C155 vs. CT x 13A scaffold and SNARE	631.9	239.3 to 1025	Yes	***	0.0002	A-H				Std. Error of Mean	86.62	98.61	79.03	107.5	86.03	92.94	71.46	124.5
									F (DFn, DFd)	0.5996 (7, 60)							C155,Tom vs. C155,Tom x Tom SNARE	-406.7	-787.6 to -25.78	Yes	*	0.0288	B-G
									P value	0.7538							C155,Tom vs. CT x 13A scaffold and SNARE	-430.5	-811.4 to -49.57	Yes	*	0.0169	B-H				Lower 95% CI	-1057	-2142	-849	-1980	-1240	-1957	-1673	-1771
									P value summary	ns							C155,Tom x Tom 13A vs. CT x 13A scaffold and SNARE	822	429.4 to 1215	Yes	****	<0.0001	C-H				Upper 95% CI	-647.4	-1687	-475.3	-1472	-833.5	-1528	-1343	-1197
									Are SDs significantly different (P < 0.05)?	No							C155,Tom x Tom 13A vs. C155,Tom x Tom 13B	374.8	-29.23 to 778.8	No	ns	0.0873	C-E
									Bartlett's test								Test details	Mean 1	Mean 2	Mean Diff.	SE of diff.	n1	n2	t	DF
									Bartlett's statistic (corrected)	3.648							C155 vs. C155,Tom x Tom 13A	-852.3	-662.2	-190.1	139	8	8	1.367	60
									P value	0.8193							C155 vs. C155,Tom x Tom 13B	-852.3	-1037	184.7	139	8	8	1.329	60
									P value summary	ns							C155,Tom vs. C155,Tom x Tom 13A∆	-1915	-1726	-188.4	135.1	9	8	1.394	60
									Are SDs significantly different (P < 0.05)?	No							C155,Tom vs. C155,Tom x Tom 13B∆	-1915	-1742	-172.2	131.1	9	9	1.314	60
																	C155 vs. C155,Tom x Tom SNARE	-852.3	-1508	655.7	135.1	8	9	4.854	60
									ANOVA table	SS	DF	MS	F (DFn, DFd)	P value			C155 vs. CT x 13A scaffold and SNARE	-852.3	-1484	631.9	135.1	8	9	4.678	60
									Treatment (between columns)	12250833	7	1750119	F (7, 60) = 22.64	P<0.0001			C155,Tom vs. C155,Tom x Tom SNARE	-1915	-1508	-406.7	131.1	9	9	3.103	60
									Residual (within columns)	4637635	60	77294					C155,Tom vs. CT x 13A scaffold and SNARE	-1915	-1484	-430.5	131.1	9	9	3.285	60
									Total	16888468	67						C155,Tom x Tom 13A vs. CT x 13A scaffold and SNARE	-662.2	-1484	822	135.1	8	9	6.085	60
																	C155,Tom x Tom 13A vs. C155,Tom x Tom 13B	-662.2	-1037	374.8	139	8	8	2.696	60
									Data summary
									Number of treatments (columns)	8
									Number of values (total)	68

## Sheet: Figure 3 B
C155	C155,Tom	C155,Tom x Tom 13A	C155 x Tom 13A∆	C155,Tom x Tom 13B	C155,Tom x Tom 13B∆	C155,Tom x Tom SNARE	CT x 13A scaffold and SNARE
3	11.2333	1.96667	8.76667	1.13333	14.0667	9.86667	3.60714
2.13333	10.9	1.3	8.5	2.16667	12.3667	6.43333	1.86667
2.93333	14.4333	1.53333	11.5333	4.6	11.1333	4.1	3.81481																				C155	C155,Tom	C155,Tom x Tom 13A	C155 x Tom 13A∆	C155,Tom x Tom 13B	C155,Tom x Tom 13B∆	C155,Tom x Tom SNARE	CT x 13A scaffold and SNARE
2.46667	8.4	1.7	12.3	3.8	12.8667	6.3	4		Table Analyzed	Copy of Rescue Mini						Number of families	1									Number of values	8	9	8	8	8	9	8	9
2.76667	13.2333	4.16667	10.0333	3.43333	10.7667	7.6	2.13333		Data sets analyzed	A-H						Number of comparisons per family	10
5	12.5	1.56667	8.7	3.03333	8.66667	5.86667	2.03333									Alpha	0.05									Minimum	2	8.4	1	6.7	1.133	8.667	4.1	1.867
3.7	15.3	1.3	9.2	1.8	11.4667	7	4.32143		ANOVA summary																	25% Percentile	2.217	10.82	1.3	8.55	1.5	10.33	5.667	2.083
2	10.7333	1	6.7	1.4	10.8667	5.6	5.31579		F	60.7						Šídák's multiple comparisons test	Mean Diff.	95.00% CI of diff.	Below threshold?	Summary	Adjusted P Value					Median	2.85	12.5	1.55	8.983	2.6	11.13	6.367	3.815
	16.1333				9.9		5.04762		P value	<0.0001						C155 vs. C155,Tom x Tom 13A	1.183	-1.133 to 3.500	No	ns	0.7855	A-C				75% Percentile	3.525	14.87	1.9	11.16	3.708	12.62	7.45	4.685
									P value summary	****						C155 vs. C155,Tom x Tom 13B	0.3292	-1.987 to 2.645	No	ns	>0.9999	A-E				Maximum	5	16.13	4.167	12.3	4.6	14.07	9.867	5.316
									Significant diff. among means (P < 0.05)?	Yes						C155,Tom vs. C155 x Tom 13A∆	3.074	0.8231 to 5.325	Yes	**	0.002	B-D
									R squared	0.8781						C155,Tom vs. C155,Tom x Tom 13B∆	1.196	-0.9875 to 3.380	No	ns	0.7101	B-F				Mean	3	12.54	1.817	9.467	2.671	11.34	6.596	3.571
																C155 vs. C155,Tom x Tom SNARE	-3.596	-5.912 to -1.280	Yes	***	0.0003	A-G				Std. Deviation	0.9699	2.485	0.993	1.787	1.236	1.607	1.679	1.293
									Brown-Forsythe test							C155 vs. CT x 13A scaffold and SNARE	-0.5711	-2.822 to 1.680	No	ns	0.998	A-H				Std. Error of Mean	0.3429	0.8283	0.3511	0.6319	0.4371	0.5356	0.5937	0.4309
									F (DFn, DFd)	1.664 (7, 59)						C155,Tom vs. C155,Tom x Tom SNARE	5.945	3.694 to 8.196	Yes	****	<0.0001	B-G
									P value	0.1356						C155,Tom vs. CT x 13A scaffold and SNARE	8.97	6.786 to 11.15	Yes	****	<0.0001	B-H				Lower 95% CI	2.189	10.63	0.9865	7.973	1.637	10.11	5.192	2.577
									P value summary	ns						C155,Tom x Tom SNARE vs. CT x 13A scaffold and SNARE	3.025	0.7737 to 5.276	Yes	**	0.0024	G-H				Upper 95% CI	3.811	14.45	2.647	10.96	3.704	12.58	8	4.565
									Are SDs significantly different (P < 0.05)?	No						C155,Tom x Tom 13A vs. CT x 13A scaffold and SNARE	-1.754	-4.005 to 0.4965	No	ns	0.2401	C-H
									Bartlett's test							Test details	Mean 1	Mean 2	Mean Diff.	SE of diff.	n1	n2	t	DF
									Bartlett's statistic (corrected)	10.32						C155 vs. C155,Tom x Tom 13A	3	1.817	1.183	0.7964	8	8	1.486	59
									P value	0.1711						C155 vs. C155,Tom x Tom 13B	3	2.671	0.3292	0.7964	8	8	0.4133	59
									P value summary	ns						C155,Tom vs. C155 x Tom 13A∆	12.54	9.467	3.074	0.774	9	8	3.972	59
									Are SDs significantly different (P < 0.05)?	No						C155,Tom vs. C155,Tom x Tom 13B∆	12.54	11.34	1.196	0.7509	9	9	1.593	59
																C155 vs. C155,Tom x Tom SNARE	3	6.596	-3.596	0.7964	8	8	4.515	59
									ANOVA table	SS	DF	MS	F (DFn, DFd)	P value		C155 vs. CT x 13A scaffold and SNARE	3	3.571	-0.5711	0.774	8	9	0.7379	59
									Treatment (between columns)	1078	7	154	F (7, 59) = 60.70	P<0.0001		C155,Tom vs. C155,Tom x Tom SNARE	12.54	6.596	5.945	0.774	9	8	7.681	59
									Residual (within columns)	149.7	59	2.537				C155,Tom vs. CT x 13A scaffold and SNARE	12.54	3.571	8.97	0.7509	9	9	11.95	59
									Total	1228	66					C155,Tom x Tom SNARE vs. CT x 13A scaffold and SNARE	6.596	3.571	3.025	0.774	8	9	3.908	59
																C155,Tom x Tom 13A vs. CT x 13A scaffold and SNARE	1.817	3.571	-1.754	0.774	8	9	2.267	59
									Data summary
									Number of treatments (columns)	8
									Number of values (total)	67

## Sheet: Figure 3 D
CT>13A Synapsin	CT>13B Synapsin	CT>13A∆SNARE Synapsin	CT>13B∆SNARE Synapsin	CT> SNARE Synapsin	CT>13A HRP	CT>13B HRP
0.541	0.741	0.568	0.511	0.588	0.176	0.032
0.445	0.665	0.639	0.474	0.382	0.0695	0																				CT>13A Synapsin	CT>13B Synapsin	CT>13A∆SNARE Synapsin	CT>13B∆SNARE Synapsin	CT> SNARE Synapsin	CT>13A HRP	CT>13B HRP
0.585	0.629	0.574	0.451	0.399	0.181	0.15		Table Analyzed	Useable						Number of families	1									Number of values	10	9	11	8	7	10	8
0.671	0.629	0.628	0.463	0.314	0.208	0.126		Data sets analyzed	A-G						Number of comparisons per family	7
0.637	0.664	0.528	0.492	0.432	0.0993	0.109									Alpha	0.05									Minimum	0.434	0.602	0.477	0.451	0.314	0.0554	0
0.56	0.605	0.624	0.503	0.414	0.133	0.109		ANOVA summary																	25% Percentile	0.4825	0.616	0.536	0.4658	0.382	0.09185	0.008
0.591	0.602	0.477	0.497	0.384	0.169	0		F	129.2						Šídák's multiple comparisons test	Mean Diff.	95.00% CI of diff.	Below threshold?	Summary	Adjusted P Value					Median	0.5725	0.629	0.577	0.4905	0.399	0.1405	0.0978
0.495	0.696	0.577	0.489		0.0554	0.0866		P value	<0.0001						CT>13A Synapsin vs. CT>13A∆SNARE Synapsin	-0.03101	-0.1034 to 0.04143	No	ns	0.8513	A-C				75% Percentile	0.6093	0.6805	0.628	0.5015	0.432	0.1773	0.1218
0.434	0.627	0.686			0.141			P value summary	****						CT>13A Synapsin vs. CT>13B Synapsin	-0.09499	-0.1712 to -0.01881	Yes	**	0.007	A-B				Maximum	0.671	0.741	0.686	0.511	0.588	0.208	0.15
0.6		0.619			0.14			Significant diff. among means (P < 0.05)?	Yes						CT>13B Synapsin vs. CT>13B∆SNARE Synapsin	0.1659	0.08533 to 0.2464	Yes	****	<0.0001	B-D
		0.536						R squared	0.9326						CT>13A Synapsin vs. CT> SNARE Synapsin	0.1398	0.05805 to 0.2215	Yes	****	<0.0001	A-E				Mean	0.5559	0.6509	0.5869	0.485	0.4161	0.1372	0.07658
															CT>13B Synapsin vs. CT> SNARE Synapsin	0.2347	0.1512 to 0.3183	Yes	****	<0.0001	B-E				Std. Deviation	0.07814	0.04548	0.05949	0.0206	0.08438	0.04966	0.05825
								Brown-Forsythe test							CT>13A Synapsin vs. CT>13A HRP	0.4187	0.3445 to 0.4928	Yes	****	<0.0001	A-F				Std. Error of Mean	0.02471	0.01516	0.01794	0.007283	0.03189	0.01571	0.02059
								F (DFn, DFd)	1.127 (6, 56)						CT>13B Synapsin vs. CT>13B HRP	0.5743	0.4938 to 0.6549	Yes	****	<0.0001	B-G
								P value	0.3588																Lower 95% CI	0.5	0.6159	0.5469	0.4678	0.3381	0.1017	0.02788
								P value summary	ns						Test details	Mean 1	Mean 2	Mean Diff.	SE of diff.	n1	n2	t	DF		Upper 95% CI	0.6118	0.6859	0.6269	0.5022	0.4942	0.1727	0.1253
								Are SDs significantly different (P < 0.05)?	No						CT>13A Synapsin vs. CT>13A∆SNARE Synapsin	0.5559	0.5869	-0.03101	0.02602	10	11	1.192	56
															CT>13A Synapsin vs. CT>13B Synapsin	0.5559	0.6509	-0.09499	0.02736	10	9	3.472	56
								Bartlett's test							CT>13B Synapsin vs. CT>13B∆SNARE Synapsin	0.6509	0.485	0.1659	0.02893	9	8	5.734	56
								Bartlett's statistic (corrected)	13.04						CT>13A Synapsin vs. CT> SNARE Synapsin	0.5559	0.4161	0.1398	0.02934	10	7	4.763	56
								P value	0.0423						CT>13B Synapsin vs. CT> SNARE Synapsin	0.6509	0.4161	0.2347	0.03001	9	7	7.823	56
								P value summary	*						CT>13A Synapsin vs. CT>13A HRP	0.5559	0.1372	0.4187	0.02663	10	10	15.72	56
								Are SDs significantly different (P < 0.05)?	Yes						CT>13B Synapsin vs. CT>13B HRP	0.6509	0.07658	0.5743	0.02893	9	8	19.85	56
								ANOVA table	SS	DF	MS	F (DFn, DFd)	P value
								Treatment (between columns)	2.747	6	0.4579	F (6, 56) = 129.2	P<0.0001
								Residual (within columns)	0.1985	56	0.003545
								Total	2.946	62
								Data summary
								Number of treatments (columns)	7
								Number of values (total)	63
