# Supplementary material for: The decoy SNARE Tomosyn sets tonic versus phasic release properties and is required for homeostatic synaptic plasticity
Source: eLife journal article supplement (doi:10.7554/elife.72841), 2021-10-29
Supplement: supp [file elife-72841-supp-v1.zip › elife_poa_e72841_Figure_4_figure_supplement_1_source_data_1.xlsx]

## Sheet: Figure 4 Supplemental 1 A
Ca conc.	Control																		Tom
0.1	0.762858	0.896923	0.707323	0.640041	0.642668	0.822028	1.81125	1.52867	0.619979	1.01094	0.539218	0.38438							3.90955	2.43021	1.4408	1.82483	10.7386	1.42335	3.26261	2.37768	6.17944	2.37164	5.44706	3.94272
0.2	20.7764	13.8504	7.23476	14.8992	17.7025	11.3362	24.8163	8.97085	7.88385	12.7322	19.1237	10.3175							22.91	23.0613	31.7898	39.4566	30.9275	39.0238	38.3685	42.2857	35.0281	23.8626	23.4917	43.6378	41.5304
0.25	22.0411	26.4266	18.6169	32.3815	20.5687	16.5686	22.6228	23.2096	23.1078	34.4675	16.6332	35.0716							40.4289	36.2386	60.6429	50.3671	58.694	51.1227	54.2178	56.7371	54.2945	42.5706	56.6888	57.8829
0.3	46.0054	62.2924	44.2414	65.8829	68.0664	57.5915	50.3801	52.154	63.2739	70.7859	62.6672	61.6013	55.2968	27.7418	25.2112	32.1639	34.9309		50.959	84.7006	77.9107	107.782	95.793	82.0558	93.377	79.9486	67.6078	92.8006	70.7641	89.1269	82.5255	60.555	82.7841	95.7024	95.3587	97.5967
0.4	60.0008	65.3068	109.236	63.5157	67.5007	99.3855	100.433	80.3009	92.2177	101.348	48.1301	96.6589	59.8346	52.6475					133.356	105.386	110.063	113.766	115.64	111.693	97.0805	117.445	133.926	119.842	107.53	120.683
0.5	106.1	110.222	96.6762	94.0689	78.4127	97.5014	64.8083	56.4541	128.822	97.6374	66.5939	117.086							144.207	137.226	111.799	110.326	127.326	152.584	129.794	157.552	114.137	133.573	122.401	127.24
0.75	148.708	140.452	190.829	138.245	152.906	83.1659	73.66	101.068	116.025	156.923									218.424	174.332	185.994	169.027	156.789	162.811	139.714	156.177	133.076	150.494
1.5	123.66	133.696	148.945	163.829	150.117	135.699	150.784	138.57	172.399	197.464	210.275	191.684							235.545	195.345	179.902	206.671	223.309	192.583	154.796	176.371	265.302	176.733	189.776	180.522

## Sheet: Figure 4 Supplemental 1 D
Control	Tom
-68.5801	-64.2742
-69.7605	-75.6961						Control	Tom
-77.3995	-62.5425		Table Analyzed	EJC		Number of values	8	8
-73.4478	-81.3716
-63.0322	-78.4253		Column B	Tom		Minimum	-77.4	-81.37
-46.7428	-75.9127		vs.	vs.		25% Percentile	-72.53	-77.8
-54.6328	-72.3459		Column A	Control		Median	-65.81	-74.02
-61.9594	-70.0957					75% Percentile	-56.46	-65.73
			Unpaired t test			Maximum	-46.74	-62.54
			P value	0.0773
			P value summary	ns		Mean	-64.44	-72.58
			Significantly different (P < 0.05)?	No		Std. Deviation	10.09	6.636
			One- or two-tailed P value?	Two-tailed		Std. Error of Mean	3.566	2.346
			t, df	t=1.907, df=14
						Lower 95% CI	-72.88	-78.13
			How big is the difference?			Upper 95% CI	-56.01	-67.04
			Mean of column A	-64.44
			Mean of column B	-72.58
			Difference between means (B - A) ± SEM	-8.139 ± 4.268
			95% confidence interval	-17.29 to 1.016
			R squared (eta squared)	0.2061
			F test to compare variances
			F, DFn, Dfd	2.310, 7, 7
			P value	0.2917
			P value summary	ns
			Significantly different (P < 0.05)?	No
			Data analyzed
			Sample size, column A	8
			Sample size, column B	8

## Sheet: Figure 4 Supplemental 1 F
25 msec										50 msec											75 msec
Control	TomNA1									Control	TomNA1										Control	TomNA1
1.19921	1.46524						Control	TomNA1		1.16762	1.35617						Control	TomNA1			1.11419	1.26967						Control	TomNA1
1.27283	1.44004		Table Analyzed	25 msec PPF		Number of values	8	8		1.20857	1.32021		Table Analyzed	50 msec PPF		Number of values	8	8			1.15297	1.2746		Table Analyzed	75 msec PPF		Number of values	8	8
1.36977	1.55888									1.24222	1.5402										1.21681	1.32939
1.12807	1.40392		Column B	TomNA1		Minimum	1.091	1.343		1.1375	1.34363		Column B	TomNA1		Minimum	1.137	1.318			1.06099	1.19863		Column B	TomNA1		Minimum	1.061	1.163
1.22833	1.3434		vs.	vs.		25% Percentile	1.135	1.413		1.32698	1.35454		vs.	vs.		25% Percentile	1.178	1.323			1.28308	1.16331		vs.	vs.		25% Percentile	1.124	1.2
1.15599	1.48161		Column A	Control		Median	1.214	1.463		1.26929	1.33001		Column A	Control		Median	1.256	1.349			1.26341	1.20577		Column A	Control		Median	1.197	1.239
1.27895	1.48816					75% Percentile	1.277	1.487		1.32226	1.52823					75% Percentile	1.31	1.485			1.17623	1.25267					75% Percentile	1.258	1.273
1.09097	1.46061		Unpaired t test			Maximum	1.37	1.559		1.27433	1.31849		Unpaired t test			Maximum	1.327	1.54			1.24074	1.22616		Unpaired t test			Maximum	1.283	1.329
			P value	<0.0001									P value	0.0035										P value	0.1396
			P value summary	****		Mean	1.216	1.455					P value summary	**		Mean	1.244	1.386						P value summary	ns		Mean	1.189	1.24
			Significantly different (P < 0.05)?	Yes		Std. Deviation	0.09121	0.06327					Significantly different (P < 0.05)?	Yes		Std. Deviation	0.06867	0.09235						Significantly different (P < 0.05)?	No		Std. Deviation	0.07679	0.05235
			One- or two-tailed P value?	Two-tailed		Std. Error of Mean	0.03225	0.02237					One- or two-tailed P value?	Two-tailed		Std. Error of Mean	0.02428	0.03265						One- or two-tailed P value?	Two-tailed		Std. Error of Mean	0.02715	0.01851
			t, df	t=6.108, df=14									t, df	t=3.511, df=14										t, df	t=1.566, df=14
						Lower 95% CI	1.139	1.402								Lower 95% CI	1.186	1.309									Lower 95% CI	1.124	1.196
			How big is the difference?			Upper 95% CI	1.292	1.508					How big is the difference?			Upper 95% CI	1.301	1.464						How big is the difference?			Upper 95% CI	1.253	1.284
			Mean of column A	1.216									Mean of column A	1.244										Mean of column A	1.189
			Mean of column B	1.455									Mean of column B	1.386										Mean of column B	1.24
			Difference between means (B - A) ± SEM	0.2397 ± 0.03925									Difference between means (B - A) ± SEM	0.1428 ± 0.04069										Difference between means (B - A) ± SEM	0.05147 ± 0.03286
			95% confidence interval	0.1555 to 0.3239									95% confidence interval	0.05557 to 0.2301										95% confidence interval	-0.01900 to 0.1219
			R squared (eta squared)	0.7271									R squared (eta squared)	0.4682										R squared (eta squared)	0.1491
			F test to compare variances										F test to compare variances											F test to compare variances
			F, DFn, Dfd	2.078, 7, 7									F, DFn, Dfd	1.809, 7, 7										F, DFn, Dfd	2.152, 7, 7
			P value	0.3554									P value	0.4524										P value	0.3335
			P value summary	ns									P value summary	ns										P value summary	ns
			Significantly different (P < 0.05)?	No									Significantly different (P < 0.05)?	No										Significantly different (P < 0.05)?	No
			Data analyzed										Data analyzed											Data analyzed
			Sample size, column A	8									Sample size, column A	8										Sample size, column A	8
			Sample size, column B	8									Sample size, column B	8										Sample size, column B	8
