# Supplementary material for: The decoy SNARE Tomosyn sets tonic versus phasic release properties and is required for homeostatic synaptic plasticity
Source: eLife journal article supplement (doi:10.7554/elife.72841), 2021-10-29
Supplement: supp [file elife-72841-supp-v1.zip › elife_poa_e72841_Figure_4_source_data_1.xlsx]

## Sheet: Figure 4 B
Syt	Tom Syt
-51.6384	-91.384
-19.4009	-76.1947						Syt	Tom Syt
-15.4112	-62.8846		Table Analyzed	Area		Number of values	12	10
-14.5396	-91.9134
-27.2747	-54.3266		Column B	Tom Syt		Minimum	-67.22	-91.91
-43.0981	-61.6344		vs.	vs.		25% Percentile	-50.61	-79.99
-35.9258	-70.2875		Column A	Syt		Median	-37.22	-66.59
-47.5437	-50.3587					75% Percentile	-20.26	-59.39
-67.2207	-61.0775		Unpaired t test			Maximum	-14.54	-50.36
-22.8354	-70.4863		P value	0.0002
-38.5211			P value summary	***		Mean	-37.13	-69.05
-62.1295			Significantly different (P < 0.05)?	Yes		Std. Deviation	17.8	14.14
			One- or two-tailed P value?	Two-tailed		Std. Error of Mean	5.139	4.471
			t, df	t=4.587, df=20
						Lower 95% CI	-48.44	-79.17
			How big is the difference?			Upper 95% CI	-25.82	-58.94
			Mean of column A	-37.13
			Mean of column B	-69.05
			Difference between means (B - A) ± SEM	-31.93 ± 6.960
			95% confidence interval	-46.45 to -17.41
			R squared (eta squared)	0.5127
			F test to compare variances
			F, DFn, Dfd	1.586, 11, 9
			P value	0.4981
			P value summary	ns
			Significantly different (P < 0.05)?	No
			Data analyzed
			Sample size, column A	12
			Sample size, column B	10

## Sheet: Figure 4 F
Syt	Tom Syt
0.524373	0.845309
0.646437	0.795881						Syt	Tom Syt
0.613309	0.789273		Table Analyzed	Asynch		Number of values	11	10
0.252604	0.860717
0.483051	0.718424		Column B	Tom Syt		Minimum	0.2526	0.6604
0.338476	0.71487		vs.	vs.		25% Percentile	0.3385	0.7138
0.286764	0.861092		Column A	Syt		Median	0.4369	0.7538
0.417163	0.715093					75% Percentile	0.5244	0.8492
0.436944	0.710547		Unpaired t test			Maximum	0.6464	0.8611
0.428014	0.660425		P value	<0.0001
0.473534			P value summary	****		Mean	0.4455	0.7672
			Significantly different (P < 0.05)?	Yes		Std. Deviation	0.1233	0.07258
			One- or two-tailed P value?	Two-tailed		Std. Error of Mean	0.03717	0.02295
			t, df	t=7.186, df=19
						Lower 95% CI	0.3627	0.7152
			How big is the difference?			Upper 95% CI	0.5283	0.8191
			Mean of column A	0.4455
			Mean of column B	0.7672
			Difference between means (B - A) ± SEM	0.3216 ± 0.04476
			95% confidence interval	0.2280 to 0.4153
			R squared (eta squared)	0.731
			F test to compare variances
			F, DFn, Dfd	2.885, 10, 9
			P value	0.1261
			P value summary	ns
			Significantly different (P < 0.05)?	No
			Data analyzed
			Sample size, column A	11
			Sample size, column B	10

## Sheet: Figure 4 H
Syt	Tom Syt
4.5	21.6667
7.63333	16.0667						Syt	Tom Syt
3.73333	19.7		Table Analyzed	Mini Freq		Number of values	12	10
3.7	17.1667
4.13333	17.1724		Column B	Tom Syt		Minimum	3.7	12.23
6.16667	12.2333		vs.	vs.		25% Percentile	4.225	14.12
7.66667	13.0333		Column A	Syt		Median	5.567	17.17
5.4	14.4839					75% Percentile	7.342	20.08
5.56667	18.9333		Unpaired t test			Maximum	13.77	21.67
13.7667	21.2333		P value	<0.0001
5.56667			P value summary	****		Mean	6.192	17.17
6.46667			Significantly different (P < 0.05)?	Yes		Std. Deviation	2.738	3.269
			One- or two-tailed P value?	Two-tailed		Std. Error of Mean	0.7904	1.034
			t, df	t=8.579, df=20
						Lower 95% CI	4.452	14.83
			How big is the difference?			Upper 95% CI	7.931	19.51
			Mean of column A	6.192
			Mean of column B	17.17
			Difference between means (B - A) ± SEM	10.98 ± 1.280
			95% confidence interval	8.308 to 13.65
			R squared (eta squared)	0.7863
			F test to compare variances
			F, DFn, Dfd	1.425, 9, 11
			P value	0.5709
			P value summary	ns
			Significantly different (P < 0.05)?	No
			Data analyzed
			Sample size, column A	12
			Sample size, column B	10

## Sheet: Figure 4 J
Syt7 Ctrl	Syt7	Tom	Tom;Syt7
-442.913	-658.541	-1515.86	-1995.55
-504.024	-830.328	-1326.07	-1914.27																				Syt7 Ctrl	Syt7	Tom	Tom;Syt7
-570.184	-844.561	-1299.26	-2407.33		Table Analyzed	TomSyt Area						Number of families	1									Number of values	8	9	8	8
-562.852	-811.292	-1808.66	-1452.43		Data sets analyzed	A-D						Number of comparisons per family	6
-327.977	-924.988	-2114.34	-1926.36									Alpha	0.05									Minimum	-570.2	-993.7	-2114	-2407
-331.929	-993.745	-1601.64	-1611.76		ANOVA summary																	25% Percentile	-548.1	-909.3	-1794	-2171
-327.641	-880.176	-1601.45	-1849.07		F	84.57						Tukey's multiple comparisons test	Mean Diff.	95.00% CI of diff.	Below threshold?	Summary	Adjusted P Value					Median	-437.4	-844.6	-1602	-1920
-431.902	-726.517	-1748.2	-2230.07		P value	<0.0001						Syt7 Ctrl vs. Syt7	403	121.6 to 684.3	Yes	**	0.0028	A-B				75% Percentile	-329	-768.9	-1374	-1671
	-893.559				P value summary	****						Syt7 Ctrl vs. Tom	1190	900.0 to 1479	Yes	****	<0.0001	A-C				Maximum	-327.6	-658.5	-1299	-1452
					Significant diff. among means (P < 0.05)?	Yes						Syt7 Ctrl vs. Tom;Syt7	1486	1196 to 1775	Yes	****	<0.0001	A-D
					R squared	0.8974						Syt7 vs. Tom	786.5	505.2 to 1068	Yes	****	<0.0001	B-C				Mean	-437.4	-840.4	-1627	-1923
												Syt7 vs. Tom;Syt7	1083	801.6 to 1364	Yes	****	<0.0001	B-D				Std. Deviation	102.1	101.3	266.4	306.6
					Brown-Forsythe test							Tom vs. Tom;Syt7	296.4	6.900 to 585.9	Yes	*	0.0433	C-D				Std. Error of Mean	36.11	33.77	94.19	108.4
					F (DFn, DFd)	2.371 (3, 29)
					P value	0.091						Test details	Mean 1	Mean 2	Mean Diff.	SE of diff.	n1	n2	q	DF		Lower 95% CI	-522.8	-918.3	-1850	-2180
					P value summary	ns						Syt7 Ctrl vs. Syt7	-437.4	-840.4	403	103.3	8	9	5.519	29		Upper 95% CI	-352	-762.5	-1404	-1667
					Are SDs significantly different (P < 0.05)?	No						Syt7 Ctrl vs. Tom	-437.4	-1627	1190	106.3	8	8	15.83	29
												Syt7 Ctrl vs. Tom;Syt7	-437.4	-1923	1486	106.3	8	8	19.78	29
					Bartlett's test							Syt7 vs. Tom	-840.4	-1627	786.5	103.3	9	8	10.77	29
					Bartlett's statistic (corrected)	13.07						Syt7 vs. Tom;Syt7	-840.4	-1923	1083	103.3	9	8	14.83	29
					P value	0.0045						Tom vs. Tom;Syt7	-1627	-1923	296.4	106.3	8	8	3.945	29
					P value summary	**
					Are SDs significantly different (P < 0.05)?	Yes
					ANOVA table	SS	DF	MS	F (DFn, DFd)	P value
					Treatment (between columns)	11459443	3	3819814	F (3, 29) = 84.57	P<0.0001
					Residual (within columns)	1309900	29	45169
					Total	12769343	32
					Data summary
					Number of treatments (columns)	4
					Number of values (total)	33

## Sheet: Figure 4 L
Syt7 Ctrl	Syt7	Tom	Tom;Syt7
0.8	1.56667	6.73333	4.7619
0.9	1.66667	4.95238	7.13333
0.6	0.903226	3.3	4.91667																				Syt7 Ctrl	Syt7	Tom	Tom;Syt7
1.21212	1.06452	9.47368	5.46667		Table Analyzed	TomSyt Mini						Number of families	1									Number of values	8	8	8	8
1.57692	1.4	4.6087	6.08696		Data sets analyzed	A-D						Number of comparisons per family	6
0.72	1.76667	8.15385	4.42308									Alpha	0.05									Minimum	0.6	0.9032	3.3	4.375
1.26667	1.83333	8.23077	4.375		ANOVA summary																	25% Percentile	0.74	1.148	4.695	4.508
1.48387	2.35484	5.77778	5.26667		F	39.98						Tukey's multiple comparisons test	Mean Diff.	95.00% CI of diff.	Below threshold?	Summary	Adjusted P Value					Median	1.056	1.617	6.256	5.092
					P value	<0.0001						Syt7 Ctrl vs. Syt7	-0.4995	-2.126 to 1.127	No	ns	0.8357	A-B				75% Percentile	1.43	1.817	8.212	5.932
					P value summary	****						Syt7 Ctrl vs. Tom	-5.334	-6.960 to -3.707	Yes	****	<0.0001	A-C				Maximum	1.577	2.355	9.474	7.133
					Significant diff. among means (P < 0.05)?	Yes						Syt7 Ctrl vs. Tom;Syt7	-4.234	-5.860 to -2.607	Yes	****	<0.0001	A-D
					R squared	0.8108						Syt7 vs. Tom	-4.834	-6.461 to -3.208	Yes	****	<0.0001	B-C				Mean	1.07	1.569	6.404	5.304
												Syt7 vs. Tom;Syt7	-3.734	-5.361 to -2.108	Yes	****	<0.0001	B-D				Std. Deviation	0.365	0.4571	2.114	0.9312
					Brown-Forsythe test							Tom vs. Tom;Syt7	1.1	-0.5266 to 2.727	No	ns	0.2737	C-D				Std. Error of Mean	0.129	0.1616	0.7475	0.3292
					F (DFn, DFd)	9.587 (3, 28)
					P value	0.0002						Test details	Mean 1	Mean 2	Mean Diff.	SE of diff.	n1	n2	q	DF		Lower 95% CI	0.7648	1.187	4.636	4.525
					P value summary	***						Syt7 Ctrl vs. Syt7	1.07	1.569	-0.4995	0.5958	8	8	1.186	28		Upper 95% CI	1.375	1.952	8.171	6.082
					Are SDs significantly different (P < 0.05)?	Yes						Syt7 Ctrl vs. Tom	1.07	6.404	-5.334	0.5958	8	8	12.66	28
												Syt7 Ctrl vs. Tom;Syt7	1.07	5.304	-4.234	0.5958	8	8	10.05	28
					Bartlett's test							Syt7 vs. Tom	1.569	6.404	-4.834	0.5958	8	8	11.48	28
					Bartlett's statistic (corrected)	23.98						Syt7 vs. Tom;Syt7	1.569	5.304	-3.734	0.5958	8	8	8.864	28
					P value	<0.0001						Tom vs. Tom;Syt7	6.404	5.304	1.1	0.5958	8	8	2.611	28
					P value summary	****
					Are SDs significantly different (P < 0.05)?	Yes
					ANOVA table	SS	DF	MS	F (DFn, DFd)	P value
					Treatment (between columns)	170.3	3	56.77	F (3, 28) = 39.98	P<0.0001
					Residual (within columns)	39.75	28	1.42
					Total	210.1	31
					Data summary
					Number of treatments (columns)	4
					Number of values (total)	32
