# Supplementary material for: The decoy SNARE Tomosyn sets tonic versus phasic release properties and is required for homeostatic synaptic plasticity
Source: eLife journal article supplement (doi:10.7554/elife.72841), 2021-10-29
Supplement: supp [file elife-72841-supp-v1.zip › elife_poa_e72841_Figure_5_source_data_1.xlsx]

## Sheet: Figure 5 B
Control 1B	Control 1S	Control Total	Tomosyn 1B	Tomosyn 1S	Tomosyn Total
311	140	451	299	193	494
296	56	352	302	180	482																				Control 1B	Control 1S	Control Total	Tomosyn 1B	Tomosyn 1S	Tomosyn Total
321		321	277	56	333		Table Analyzed	AZ Number (1B)						Number of families	1									Number of values	17	12	14	17	17	17
282	154	436	266	148	414		Data sets analyzed	A-F						Number of comparisons per family	15
300	79	379	208	97	305									Alpha	0.05									Minimum	166	49	215	168	50	288
273	137	410	258	107	365		ANOVA summary																	25% Percentile	266.5	75.25	307.8	237	97.5	338
306	139	445	246	116	362		F	58.68						Tukey's multiple comparisons test	Mean Diff.	95.00% CI of diff.	Below threshold?	Summary	Adjusted P Value					Median	296	115.5	378	246	126	366
274	170	444	245	126	371		P value	<0.0001						Control 1B vs. Control 1S	172.4	108.9 to 235.9	Yes	****	<0.0001	A-B				75% Percentile	316	150.5	444.3	271.5	181.5	435
259		259	277	179	456		P value summary	****						Control 1B vs. Control Total	-86.55	-147.3 to -25.79	Yes	**	0.0011	A-C				Maximum	350	219	568	302	224	494
268		268	223	183	406		Significant diff. among means (P < 0.05)?	Yes						Control 1B vs. Tomosyn 1B	38.53	-19.21 to 96.27	No	ns	0.3828	A-D
265	94		168	196	364		R squared	0.7693						Control 1B vs. Tomosyn 1S	154.2	96.44 to 211.9	Yes	****	<0.0001	A-E				Mean	288.2	115.8	374.8	249.7	134.1	383.9
243	79	322	236	224	460									Control 1B vs. Tomosyn Total	-95.65	-153.4 to -37.91	Yes	****	<0.0001	A-F				Std. Deviation	44.15	51.86	93.81	32.26	51.78	60.76
349	219	568	245	80	325		Brown-Forsythe test							Control 1S vs. Control Total	-259	-325.2 to -192.7	Yes	****	<0.0001	B-C				Std. Error of Mean	10.71	14.97	25.07	7.824	12.56	14.74
166	49	215	251	141	392		F (DFn, DFd)	3.494 (5, 88)						Control 1S vs. Tomosyn 1B	-133.9	-197.3 to -70.40	Yes	****	<0.0001	B-D
334			245	98	343		P value	0.0063						Control 1S vs. Tomosyn 1S	-18.23	-81.70 to 45.25	No	ns	0.9598	B-E				Lower 95% CI	265.5	82.88	320.6	233.1	107.4	352.6
303	74	377	261	105	366		P value summary	**						Control 1S vs. Tomosyn Total	-268	-331.5 to -204.6	Yes	****	<0.0001	B-F				Upper 95% CI	310.9	148.8	429	266.3	160.7	415.1
350			238	50	288		Are SDs significantly different (P < 0.05)?	Yes						Control Total vs. Tomosyn 1B	125.1	64.32 to 185.8	Yes	****	<0.0001	C-D
														Control Total vs. Tomosyn 1S	240.7	180.0 to 301.5	Yes	****	<0.0001	C-E
							Bartlett's test							Control Total vs. Tomosyn Total	-9.097	-69.85 to 51.66	No	ns	0.9979	C-F
							Bartlett's statistic (corrected)	18.44						Tomosyn 1B vs. Tomosyn 1S	115.6	57.91 to 173.4	Yes	****	<0.0001	D-E
							P value	0.0024						Tomosyn 1B vs. Tomosyn Total	-134.2	-191.9 to -76.44	Yes	****	<0.0001	D-F
							P value summary	**						Tomosyn 1S vs. Tomosyn Total	-249.8	-307.6 to -192.1	Yes	****	<0.0001	E-F
							Are SDs significantly different (P < 0.05)?	Yes
														Test details	Mean 1	Mean 2	Mean Diff.	SE of diff.	n1	n2	q	DF
							ANOVA table	SS	DF	MS	F (DFn, DFd)	P value		Control 1B vs. Control 1S	288.2	115.8	172.4	21.79	17	12	11.19	88
							Treatment (between columns)	979530	5	195906	F (5, 88) = 58.68	P<0.0001		Control 1B vs. Control Total	288.2	374.8	-86.55	20.85	17	14	5.87	88
							Residual (within columns)	293803	88	3339				Control 1B vs. Tomosyn 1B	288.2	249.7	38.53	19.82	17	17	2.749	88
							Total	1273333	93					Control 1B vs. Tomosyn 1S	288.2	134.1	154.2	19.82	17	17	11	88
														Control 1B vs. Tomosyn Total	288.2	383.9	-95.65	19.82	17	17	6.825	88
							Data summary							Control 1S vs. Control Total	115.8	374.8	-259	22.73	12	14	16.11	88
							Number of treatments (columns)	6						Control 1S vs. Tomosyn 1B	115.8	249.7	-133.9	21.79	12	17	8.69	88
							Number of values (total)	94						Control 1S vs. Tomosyn 1S	115.8	134.1	-18.23	21.79	12	17	1.183	88
														Control 1S vs. Tomosyn Total	115.8	383.9	-268	21.79	12	17	17.4	88
														Control Total vs. Tomosyn 1B	374.8	249.7	125.1	20.85	14	17	8.482	88
														Control Total vs. Tomosyn 1S	374.8	134.1	240.7	20.85	14	17	16.33	88
														Control Total vs. Tomosyn Total	374.8	383.9	-9.097	20.85	14	17	0.6169	88
														Tomosyn 1B vs. Tomosyn 1S	249.7	134.1	115.6	19.82	17	17	8.252	88
														Tomosyn 1B vs. Tomosyn Total	249.7	383.9	-134.2	19.82	17	17	9.574	88
														Tomosyn 1S vs. Tomosyn Total	134.1	383.9	-249.8	19.82	17	17	17.83	88

## Sheet: Figure 5 C
Control 1B	Control 1S	Tomosyn 1B	Tomosyn 1S
23077	23213	21846	26228
32072	34784	21827	24073																				Control 1B	Control 1S	Tomosyn 1B	Tomosyn 1S
20647	17400	21483	33955		Table Analyzed	BRP AZ Intensity (Ave Max pixel) (1B)						Number of families	1									Number of values	17	12	17	17
23740	19713	24911	22275		Data sets analyzed	A-D						Number of comparisons per family	6
21856	18312	19161	17966									Alpha	0.05									Minimum	14788	16622	15725	15176
18815	19957	16524	16122		ANOVA summary																	25% Percentile	17211	17628	17582	17044
17241	17101	16315	15243		F	0.3832						Tukey's multiple comparisons test	Mean Diff.	95.00% CI of diff.	Below threshold?	Summary	Adjusted P Value					Median	19911	20682	21430	22275
14788	22871	15725	16040		P value	0.7654						Control 1B vs. Control 1S	-1011	-5875 to 3853	No	ns	0.9463	A-B				75% Percentile	22467	24304	22484	25151
19911	24667	21430	22220		P value summary	ns						Control 1B vs. Tomosyn 1B	41.24	-4384 to 4466	No	ns	>0.9999	A-C				Maximum	32457	34784	29095	33955
32457	16622	23121	23368		Significant diff. among means (P < 0.05)?	No						Control 1B vs. Tomosyn 1S	-1450	-5875 to 2975	No	ns	0.8221	A-D
17738	21406	25925	28647		R squared	0.01911						Control 1S vs. Tomosyn 1B	1052	-3812 to 5916	No	ns	0.9401	B-C				Mean	20722	21733	20681	22172
20146	24750	29095	32224									Control 1S vs. Tomosyn 1S	-439.2	-5303 to 4425	No	ns	0.9952	B-D				Std. Deviation	4987	5017	3693	5655
16403		21506	19173		Brown-Forsythe test							Tomosyn 1B vs. Tomosyn 1S	-1491	-5916 to 2934	No	ns	0.8095	C-D				Std. Error of Mean	1210	1448	895.7	1372
18101		18805	18990		F (DFn, DFd)	0.5137 (3, 59)
17181		16640	22450		P value	0.6744						Test details	Mean 1	Mean 2	Mean Diff.	SE of diff.	n1	n2	q	DF		Lower 95% CI	18158	18545	18782	19264
21398		18523	22777		P value summary	ns						Control 1B vs. Control 1S	20722	21733	-1011	1840	17	12	0.7771	59		Upper 95% CI	23286	24921	22580	25080
16704		18737	15176		Are SDs significantly different (P < 0.05)?	No						Control 1B vs. Tomosyn 1B	20722	20681	41.24	1674	17	17	0.03484	59
												Control 1B vs. Tomosyn 1S	20722	22172	-1450	1674	17	17	1.225	59
					Bartlett's test							Control 1S vs. Tomosyn 1B	21733	20681	1052	1840	12	17	0.8088	59
					Bartlett's statistic (corrected)	2.803						Control 1S vs. Tomosyn 1S	21733	22172	-439.2	1840	12	17	0.3376	59
					P value	0.423						Tomosyn 1B vs. Tomosyn 1S	20681	22172	-1491	1674	17	17	1.26	59
					P value summary	ns
					Are SDs significantly different (P < 0.05)?	No
					ANOVA table	SS	DF	MS	F (DFn, DFd)	P value
					Treatment (between columns)	27375644	3	9125215	F (3, 59) = 0.3832	P=0.7654
					Residual (within columns)	1404848662	59	23810994
					Total	1432224306	62
					Data summary
					Number of treatments (columns)	4
					Number of values (total)	63

## Sheet: Figure 5 D
Control 1B	Control 1S	Tomosyn 1B	Tomosyn 1S
20.7614	15.7749	3.1474	7.18593
11.7553	1.70642	16.3437	7.22385																				Control 1B	Control 1S	Tomosyn 1B	Tomosyn 1S
14.8269	3.96269	2.95781	7.29969		Table Analyzed	Boutons						Number of families	1									Number of values	195	140	241	229
20.4391	11.452	10.3333	1.30827		Data sets analyzed	A-D						Number of comparisons per family	6
3.48867	12.7413	3.1474	8.30457									Alpha	0.05									Minimum	0.9859	0.9101	1.119	0.929
32.8959	3.81102	5.0055	3.28012		ANOVA summary																	25% Percentile	4.702	2.659	4.257	3.261
2.38899	10.485	15.9645	9.06299		F	34.56						Tukey's multiple comparisons test	Mean Diff.	95.00% CI of diff.	Below threshold?	Summary	Adjusted P Value					Median	7.489	4.342	7.508	4.873
3.7541	1.55474	31.8531	2.69234		P value	<0.0001						Control 1B vs. Control 1S	7.186	4.945 to 9.428	Yes	****	<0.0001	A-B				75% Percentile	16.93	6.854	12.18	7.366
2.97677	2.04769	4.32292	4.62627		P value summary	****						Control 1B vs. Tomosyn 1B	3.206	1.257 to 5.156	Yes	***	0.0001	A-C				Maximum	137.2	15.77	31.85	14.75
17.4055	1.95289	10.2575	2.7113		Significant diff. among means (P < 0.05)?	Yes						Control 1B vs. Tomosyn 1S	6.747	4.775 to 8.719	Yes	****	<0.0001	A-D
2.73026	5.49848	9.11986	6.65503		R squared	0.1146						Control 1S vs. Tomosyn 1B	-3.98	-6.131 to -1.829	Yes	****	<0.0001	B-C				Mean	12.16	4.974	8.953	5.413
14.5993	5.68807	7.31865	2.95781									Control 1S vs. Tomosyn 1S	-0.4392	-2.610 to 1.732	No	ns	0.9541	B-D				Std. Deviation	14.15	2.943	5.699	2.689
2.7113	2.27524	15.6611	10.6746		Brown-Forsythe test							Tomosyn 1B vs. Tomosyn 1S	3.541	1.673 to 5.408	Yes	****	<0.0001	C-D				Std. Error of Mean	1.013	0.2488	0.3671	0.1777
12.0018	4.34188	4.60731	5.91558		F (DFn, DFd)	25.37 (3, 801)
7.79263	6.40856	17.8226	6.02934		P value	<0.0001						Test details	Mean 1	Mean 2	Mean Diff.	SE of diff.	n1	n2	q	DF		Lower 95% CI	10.16	4.482	8.23	5.063
4.34188	2.33211	2.63546	3.54555		P value summary	****						Control 1B vs. Control 1S	12.16	4.974	7.186	0.8708	195	140	11.67	801		Upper 95% CI	14.16	5.465	9.677	5.763
2.74922	3.22324	19.548	3.43179		Are SDs significantly different (P < 0.05)?	Yes						Control 1B vs. Tomosyn 1B	12.16	8.953	3.206	0.7572	195	241	5.989	801
4.75902	1.27035	2.1994	2.50275									Control 1B vs. Tomosyn 1S	12.16	5.413	6.747	0.766	195	229	12.46	801
27.6629	4.56939	3.05261	7.69784		Bartlett's test							Control 1S vs. Tomosyn 1B	4.974	8.953	-3.98	0.8354	140	241	6.738	801
7.75472	5.36572	3.46971	2.0856		Bartlett's statistic (corrected)	687						Control 1S vs. Tomosyn 1S	4.974	5.413	-0.4392	0.8434	140	229	0.7364	801
5.04341	2.74922	3.10948	12.4569		P value	<0.0001						Tomosyn 1B vs. Tomosyn 1S	8.953	5.413	3.541	0.7255	241	229	6.902	801
6.35168	3.48867	9.68864	3.65931		P value summary	****
28.7057	2.73026	2.84402	4.87278		Are SDs significantly different (P < 0.05)?	Yes
11.452	3.73514	13.2153	2.7113
1.17552	2.38899	13.1963	5.97246		ANOVA table	SS	DF	MS	F (DFn, DFd)	P value
3.1474	0.985924	2.78714	2.40795		Treatment (between columns)	6408	3	2136	F (3, 801) = 34.56	P<0.0001
20.5908	3.7541	6.65503	1.36515		Residual (within columns)	49501	801	61.8
10.7504	8.00119	1.11864	12.2673		Total	55909	804
5.68807	4.8159	8.77856	4.75902
6.27581	5.46052	2.8061	9.11986		Data summary
24.1364	2.63546	4.13333	3.79206		Number of treatments (columns)	4
0.985924	5.97246	16.0972	8.22874		Number of values (total)	805
6.27581	4.45564	3.94373	4.72111
3.20428	1.59266	3.16636	8.79752
5.99142	3.73514	3.92477	4.87278
7.22385	3.60243	7.56512	2.86298
6.67399	4.92966	7.01526	4.4746
14.2581	5.53639	4.22812	3.54555
3.84894	9.65073	2.97677	2.97677
5.97246	4.74006	8.00119	3.05261
4.79694	4.03853	3.60243	3.1474
5.21405	1.97185	10.3523	2.95781
5.76391	7.11006	9.02507	4.39876
29.3314	1.21344	12.5517	8.19082
3.07157	6.76879	3.39388	8.38041
4.36084	2.00977	7.94431	7.83055
4.58835	1.83913	5.9535	5.80183
1.95289	9.23362	12.1724	4.64527
31.2843	7.05318	7.39449	4.03853
11.433	9.87828	7.05318	6.35168
7.94431	3.98165	3.20428	5.11925
25.4256	3.92477	3.03365	2.93881
2.69234	3.48867	12.0966	6.0483
6.12414	13.1015	8.19082	4.15229
8.17186	1.95289	4.20917	4.03853
17.6709	5.30885	4.45564	6.71191
5.25197	3.50763	17.0263	3.05261
19.8703	4.83486	4.24708	6.67399
9.15778	1.17552	8.64584	4.39876
3.54555	9.32842	4.07645	2.44587
25.1602	4.03853	13.4428	1.64954
9.84036	10.466	10.7884	0.966965
4.49356	6.92047	5.23301	3.81102
13.6134	5.57431	8.28561	3.41283
15.8318	6.82567	3.07157	3.56451
5.34676	3.41283	13.2153	4.19021
5.76391	6.93943	3.31804	2.95781
9.08195	3.84894	19.7565	4.79694
5.97246	2.8061	7.05318	1.99081
20.9321	7.77367	4.30396	6.71191
3.90582	2.8061	11.6605	11.9828
5.40364	6.90151	3.60243	2.7113
31.9859	8.85443	16.8177	6.9963
8.45625	3.62139	20.0409	8.49417
6.80671	6.86359	3.79206	3.337
9.80244	1.89601	6.23789	7.81159
20.2495	1.49786	4.05749	7.75472
11.1865	6.35168	4.53147	11.2623
20.3253	5.51744	7.81159	1.83913
16.3626	7.03422	17.1969	3.54555
32.2892	2.44587	6.40856	5.87766
4.11437	10.3523	3.52659	3.29908
11.8691	8.91131	15.1492	3.65931
6.01038	2.82506	10.2954	4.09541
14.4287	1.63058	11.1865	2.59754
3.81102	6.90151	2.0856	3.41283
19.9651	5.55535	3.16636	4.51252
8.94923	7.28073	2.91985	6.06726
2.55963	6.40856	23.1883	8.20978
18.4862	4.34188	5.74495	7.96327
6.73087	6.35168	17.6709	6.80671
18.0311	7.65992	2.54067	8.77856
18.7516	4.60731	4.79694	6.10518
3.90582	12.0018	13.803	7.43241
3.88686	2.02873	6.97734	4.92966
16.9315	1.97185	10.4091	2.69234
13.7082	2.27524	30.4122	5.04341
8.96819	6.86359	3.71618	10.4471
4.19021	4.87278	11.3571	7.56512
15.9455	3.41283	16.4764	1.45995
7.12902	9.66969	24.8568	6.40856
6.10518	12.1724	11.926	7.67888
6.4844	1.74434	2.67338	3.337
6.92047	2.55963	4.9107	3.31804
28.6109	5.19509	3.88686	11.9639
3.81102	1.7633	7.47032	2.06665
23.7002	3.26116	11.926	3.20428
6.12414	6.61712	12.4379	5.76391
21.4629	1.74434	11.907	3.10948
2.00977	4.13333	14.4477	8.53209
17.4624	2.73026	10.6746	7.22385
17.9553	5.9535	9.59385	7.90639
3.29908	1.83913	4.55043	5.78287
4.09541	8.53209	15.1871	6.44648
8.45625	3.43179	7.84951	7.41345
17.4434	2.54067	6.92047	11.907
35.6073	4.41772	7.29969	5.72599
8.1529	1.78225	4.26604	4.26604
12.9119	3.09053	8.91131	3.2422
15.3388	5.61223	27.0752	5.30885
4.8159	3.58347	13.4428	2.42691
5.53639	8.1529	17.2348	7.67888
13.3101	4.20917	10.0489	4.64527
18.6379	5.25197	8.74064	8.02018
9.66969	7.22385	5.72599	6.97734
7.81159	4.34188	7.12902	5.13821
5.23301	2.40795	7.29969	8.19082
14.5425	9.42321	8.03914	4.36084
3.48867	0.910087	5.68807	8.20978
14.1064	9.25258	20.0978	10.2954
5.51744	6.9963	2.46483	6.73087
3.48867	1.85809	7.24281	4.32292
5.44156	3.26116	6.52232	7.31865
29.521	5.3278	9.74556	3.46971
10.2195	6.12414	2.48379	6.90151
4.03853	3.73514	4.75902	4.26604
21.937	2.78714	23.6434	2.88194
12.5706	6.3896	7.50824	4.56939
2.90089	1.30827	2.48379	1.49786
6.52232	3.16636	2.35107	7.64096
27.0941		9.55593	3.22324
8.20978		7.47032	5.61223
27.8146		9.06299	4.20917
4.83486		3.84894	5.25197
14.0306		3.337	2.04769
3.98165		12.6844	10.9969
7.43241		3.64035	2.23732
5.02445		10.8642	1.30827
11.3951		6.29477	8.51313
4.4746		11.7743	3.56451
3.77306		4.49356	5.17613
3.7541		15.8697	6.02934
18.2776		5.99142	7.41345
5.74495		8.28561	6.37064
25.0275		7.37553	7.73576
26.6012		5.80183	3.07157
3.48867		19.0361	6.52232
14.2202		9.1009	2.12356
4.70215		17.5192	3.12844
7.11006		3.56451	8.96819
5.80183		5.82079	6.78775
5.0055		11.0917	3.45075
20.5908		2.82506	1.95289
27.3785		13.5186	9.40425
137.196		9.1957	3.58347
4.39876		6.92047	5.25197
7.22385		13.4807	3.09053
3.54555		14.6562	4.8159
5.36572		3.56451	2.18044
26.0703		12.1914	4.26604
3.60243		7.94431	2.38899
22.9418		5.53639	5.36572
7.48928		4.51252	3.65931
21.6715		16.1162	4.32292
6.90151		9.11986	1.64954
7.16697		5.89662	4.24708
10.2575		4.34188	4.64527
7.33761		13.8789	7.50824
7.69784		6.73087	2.73026
26.7908		2.54067	3.65931
12.9119		7.92535	9.48009
5.83974		5.83974	6.14309
3.35596		17.3107	6.69295
37.0293		12.381	2.48379
5.21405		5.38468	7.92535
12.1345		14.6562	3.90582
3.07157		3.88686	3.56451
2.99573		1.74434	1.6685
9.13882		8.30457	5.78287
18.6948		9.27154	3.90582
2.06665		5.89662	9.08195
3.56451		17.9553	1.93393
6.16205		9.76452	6.90151
8.20978		17.2917	2.86298
109.723		16.9883	4.74006
		8.58896	14.7511
		5.8587	9.42321
		24.3449	2.74922
		19.6238	6.01038
		17.5951	5.78287
		6.97734	6.0483
		9.87828	4.94862
		16.4954	5.9535
		3.20428	2.42691
		8.87339	9.48009
		3.16636	4.94862
		10.1816	6.40856
		16.666	10.1627
		8.89235	2.99573
		18.9792	8.85443
		12.2483	8.87339
		2.37003	12.6465
		8.53209	8.77856
		3.20428	7.05318
		4.66423	2.84402
		16.7798	3.94373
		9.34738	4.45564
		9.48009	1.6685
		11.6795	1.59266
		4.51252	0.929046
		4.15229	7.56512
		6.92047	9.91619
		4.66423	5.47952
		7.05318	9.30946
		3.69723	3.67827
		11.5468	3.62139
		9.95411	8.00119
		17.8605	6.4844
		2.90089	5.8587
		5.78287
		4.26604
		12.9498
		10.94
		13.1394
		4.89174
		15.8128
		5.91558
		2.67338
		6.97734
		1.97185
		11.3951

## Sheet: Figure 5 E
Control 1B	Tomosyn 1B	Control 1S	Tomosyn 1S
207.803	208.392	114.917	133.233
237	186.019	42.5052	112.737																				Control 1B	Tomosyn 1B	Control 1S	Tomosyn 1S
191.722	134.478	129.515	11.9965		Table Analyzed	HRP Area (1S)						Number of families	1									Number of values	17	17	12	17
182.357	175.054	65.9217	107.651		Data sets analyzed	A-D						Number of comparisons per family	6
176.766	122.767	73.6015	76.1036									Alpha	0.05									Minimum	85.78	111.1	33.99	12
148.607	152.266	96.2752	81.0338		ANOVA summary																	25% Percentile	154	143.4	50.35	76.92
186.545	169.633	147.672	82.5712		F	19.58						Tukey's multiple comparisons test	Mean Diff.	95.00% CI of diff.	Below threshold?	Summary	Adjusted P Value					Median	176.9	164.5	69.76	84.32
150.237	160.024	64.7243	77.7297		P value	<0.0001						Control 1B vs. Tomosyn 1B	11.28	-24.71 to 47.26	No	ns	0.8407	A-B				75% Percentile	199.5	182.5	125.9	124.4
157.784	225.014	53.5815	115.652		P value summary	****						Control 1B vs. Control 1S	89.06	49.51 to 128.6	Yes	****	<0.0001	A-C				Maximum	237	225	171.4	217.3
171.739	126.802	171.355	140.362		Significant diff. among means (P < 0.05)?	Yes						Control 1B vs. Tomosyn 1S	76.32	40.33 to 112.3	Yes	****	<0.0001	A-D
180.062	111.125	33.9938	217.301		R squared	0.4989						Tomosyn 1B vs. Control 1S	77.79	38.23 to 117.3	Yes	****	<0.0001	B-C				Mean	176	164.7	86.94	99.69
149.953	164.492	49.2759	165.153									Tomosyn 1B vs. Tomosyn 1S	65.04	29.05 to 101.0	Yes	****	<0.0001	B-D				Std. Deviation	33.25	31.04	44.64	48.66
207.326	167.959		68.1022		Brown-Forsythe test							Control 1S vs. Tomosyn 1S	-12.75	-52.30 to 26.81	No	ns	0.8292	C-D				Std. Error of Mean	8.065	7.527	12.89	11.8
85.7754	156.609		115.238		F (DFn, DFd)	1.027 (3, 59)
176.917	206.358		84.3156		P value	0.3871						Test details	Mean 1	Mean 2	Mean Diff.	SE of diff.	n1	n2	q	DF		Lower 95% CI	158.9	148.8	58.58	74.68
207.271	179.076		77.8295		P value summary	ns						Control 1B vs. Tomosyn 1B	176	164.7	11.28	13.61	17	17	1.172	59		Upper 95% CI	193.1	180.7	115.3	124.7
174.297	154.369		27.7738		Are SDs significantly different (P < 0.05)?	No						Control 1B vs. Control 1S	176	86.94	89.06	14.96	17	12	8.419	59
												Control 1B vs. Tomosyn 1S	176	99.69	76.32	13.61	17	17	7.929	59
					Bartlett's test							Tomosyn 1B vs. Control 1S	164.7	86.94	77.79	14.96	17	12	7.353	59
					Bartlett's statistic (corrected)	4.28						Tomosyn 1B vs. Tomosyn 1S	164.7	99.69	65.04	13.61	17	17	6.758	59
					P value	0.2328						Control 1S vs. Tomosyn 1S	86.94	99.69	-12.75	14.96	12	17	1.205	59
					P value summary	ns
					Are SDs significantly different (P < 0.05)?	No
					ANOVA table	SS	DF	MS	F (DFn, DFd)	P value
					Treatment (between columns)	92510	3	30837	F (3, 59) = 19.58	P<0.0001
					Residual (within columns)	92907	59	1575
					Total	185417	62
					Data summary
					Number of treatments (columns)	4
					Number of values (total)	63

## Sheet: Figure 5 F
Control	Tomosyn
17	24
17	19							Control	Tomosyn
22	16		Table Analyzed	Bouton number (NMJ)			Number of values	16	16
26	15
20	22		Column B	Tomosyn			Minimum	10	15
18	23		vs.	vs.			25% Percentile	13.5	19
18	20		Column A	Control			Median	17.5	20
18	23						75% Percentile	20	22.75
20	19		Unpaired t test				Maximum	26	24
17	22		P value	0.0225
12	16		P value summary	*			Mean	17.19	20.19
13	20		Significantly different (P < 0.05)?	Yes			Std. Deviation	4.119	2.81
15	20		One- or two-tailed P value?	Two-tailed			Std. Error of Mean	1.03	0.7025
20	21		t, df	t=2.407, df=30
12	24						Lower 95% CI	14.99	18.69
10	19		How big is the difference?				Upper 95% CI	19.38	21.68
			Mean of column A	17.19
			Mean of column B	20.19
			Difference between means (B - A) ± SEM	3.000 ± 1.246
			95% confidence interval	0.4544 to 5.546
			R squared (eta squared)	0.1618
			F test to compare variances
			F, DFn, Dfd	2.148, 15, 15
			P value	0.15
			P value summary	ns
			Significantly different (P < 0.05)?	No
			Data analyzed
			Sample size, column A	16
			Sample size, column B	16

## Sheet: Figure 5 H
Control	Tomosyn
398290170	429822673
403257476	277975624							Control	Tomosyn
522774484	364418996		Table Analyzed	Total Syt1 Sum (NMJ)			Number of values	16	16
572944990	339204003
376884961	344729360		Column B	Tomosyn			Minimum	290704739	277975624
370784585	366414581		vs.	vs.			25% Percentile	359909856	339005539
492311506	379732964		Column A	Control			Median	391314772	365189210
356284946	503514574						75% Percentile	458870056	383180016
442087558	363701546		Unpaired t test				Maximum	572944990	503514574
461862516	406404237		P value	0.0892
384339373	380613052		P value summary	ns			Mean	408254550	367126430
449892674	384035670		Significantly different (P < 0.05)?	No			Std. Deviation	77970523	51889067
298609866	319507048		One- or two-tailed P value?	Two-tailed			Std. Error of Mean	19492631	12972267
290704739	338939384		t, df	t=1.757, df=30
333739196	309049747						Lower 95% CI	366706991	339476698
377303760	365959424		How big is the difference?				Upper 95% CI	449802109	394776162
			Mean of column A	408254550
			Mean of column B	367126430
			Difference between means (B - A) ± SEM	-41128120 ± 23414576
			95% confidence interval	-88947063 to 6690823
			R squared (eta squared)	0.09325
			F test to compare variances
			F, DFn, Dfd	2.258, 15, 15
			P value	0.1258
			P value summary	ns
			Significantly different (P < 0.05)?	No
			Data analyzed
			Sample size, column A	16
			Sample size, column B	16
