# Supplementary material for: The decoy SNARE Tomosyn sets tonic versus phasic release properties and is required for homeostatic synaptic plasticity
Source: eLife journal article supplement (doi:10.7554/elife.72841), 2021-10-29
Supplement: supp [file elife-72841-supp-v1.zip › elife_poa_e72841_Figure_6_source_data_1.xlsx]

## Sheet: Figure 6 C
Ctrl	Tom
4	7
4	5
2	5		Table Analyzed	Docked Number				Ctrl	Tom
3	7						Number of values	40	46
4	5		Column B	Tom
6	6		vs.	vs.			Minimum	0	2
2	4		Column A	Ctrl			25% Percentile	2	4
3	4						Median	4	6
5	5		Unpaired t test				75% Percentile	5	7
0	4		P value	<0.0001			Maximum	9	9
6	7		P value summary	****
6	7		Significantly different (P < 0.05)?	Yes			Mean	3.7	5.609
3	4		One- or two-tailed P value?	Two-tailed			Std. Deviation	1.897	1.653
4	6		t, df	t=4.986, df=84			Std. Error of Mean	0.3	0.2437
1	7
3	5		How big is the difference?				Lower 95% CI	3.093	5.118
2	3		Mean of column A	3.7			Upper 95% CI	4.307	6.1
2	8		Mean of column B	5.609
5	4		Difference between means (B - A) ± SEM	1.909 ± 0.3828
6	6		95% confidence interval	1.147 to 2.670
2	7		R squared (eta squared)	0.2284
1	8
4	4		F test to compare variances
4	6		F, DFn, Dfd	1.318, 39, 45
4	7		P value	0.3708
4	6		P value summary	ns
4	5		Significantly different (P < 0.05)?	No
6	7
1	5		Data analyzed
5	7		Sample size, column A	40
2	6		Sample size, column B	46
9	4
1	6
5	8
2	9
3	3
3	4
6	3
5	8
6	5
	7
	8
	4
	6
	4
	2

## Sheet: Figure 6 F
Ctrl	Tom
38.1429	40.6049
39.821	45.0812						Ctrl	Tom
40.8245	39.2559		Table Analyzed	Nearest Neighbor		Number of values	40	46
38.9938	41.1571
42.2256	47.9195		Column B	Tom		Minimum	36.25	29.97
39.4679	45.6674		vs.	vs.		25% Percentile	38.63	38.69
44.2848	40.4435		Column A	Ctrl		Median	41.16	40.78
39.2923	44.1404					75% Percentile	44.13	44.16
47.4648	39.9346		Unpaired t test			Maximum	51.73	47.92
50.8682	37.4544		P value	0.1931
38.2742	36.044		P value summary	ns		Mean	42.02	40.91
39.7921	36.8475		Significantly different (P < 0.05)?	No		Std. Deviation	4.096	3.771
43.4741	45.7687		One- or two-tailed P value?	Two-tailed		Std. Error of Mean	0.6476	0.5561
38.3449	34.0968		t, df	t=1.312, df=84
39.5095	41.6691					Lower 95% CI	40.71	39.79
41.1656	44.2434		How big is the difference?			Upper 95% CI	43.33	42.03
45.8426	39.1321		Mean of column A	42.02
44.3264	38.1013		Mean of column B	40.91
37.4236	29.9695		Difference between means (B - A) ± SEM	-1.113 ± 0.8486
39.5735	41.3441		95% confidence interval	-2.801 to 0.5742
46.0453	40.9489		R squared (eta squared)	0.02008
41.9478	33.8941
41.1612	40.5377		F test to compare variances
37.6402	44.2172		F, DFn, Dfd	1.179, 39, 45
40.0927	40.3679		P value	0.5905
42.8168	46.415		P value summary	ns
51.7324	44.2924		Significantly different (P < 0.05)?	No
43.6514	43.1727
41.2673	41.9346		Data analyzed
36.2493	44.0217		Sample size, column A	40
38.5121	44.2537		Sample size, column B	46
38.3527	42.5347
37.6004	39.449
42.3504	39.2252
50.9141	40.2853
42.602	45.9919
49.5206	43.1588
48.0603	38.7993
43.4373	37.2314
37.8851	42.9262
	38.3742
	42.4297
	46.1724
	35.6651
	39.8209
	36.8835

## Sheet: Figure 6 G
Ctrl	Tom
3	3
2	3						Ctrl	Tom
1	1		Table Analyzed	Within 100		Number of values	40	46
3	1
3	4		Column B	Tom		Minimum	0	0
3	5		vs.	vs.		25% Percentile	0	1
0	3		Column A	Ctrl		Median	2	2.5
1	1					75% Percentile	3	3.25
2	2		Unpaired t test			Maximum	4	7
0	3		P value	0.006
4	2		P value summary	**		Mean	1.725	2.652
2	6		Significantly different (P < 0.05)?	Yes		Std. Deviation	1.358	1.649
2	4		One- or two-tailed P value?	Two-tailed		Std. Error of Mean	0.2148	0.2432
3	3		t, df	t=2.819, df=84
3	4					Lower 95% CI	1.291	2.162
0	1		How big is the difference?			Upper 95% CI	2.159	3.142
1	1		Mean of column A	1.725
0	2		Mean of column B	2.652
4	3		Difference between means (B - A) ± SEM	0.9272 ± 0.3289
0	3		95% confidence interval	0.2731 to 1.581
3	1		R squared (eta squared)	0.08643
0	5
0	6		F test to compare variances
2	3		F, DFn, Dfd	1.474, 45, 39
3	2		P value	0.2186
0	0		P value summary	ns
3	1		Significantly different (P < 0.05)?	No
0	3
0	2		Data analyzed
4	3		Sample size, column A	40
2	2		Sample size, column B	46
3	4
1	2
2	2
0	2
1	3
3	1
1	1
3	0
1	7
	3
	5
	2
	2
	5
	0

## Sheet: Figure 6 H
Ctrl	Tom
8	7
6	8						Ctrl	Tom
6	6		Table Analyzed	Within 150		Number of values	40	46
8	5
6	6		Column B	Tom		Minimum	4	3
10	6		vs.	vs.		25% Percentile	7	7
7	6		Column A	Ctrl		Median	7	9.5
3	8					75% Percentile	9.75	11
4	9		Unpaired t test			Maximum	14	17
6	12		P value	0.0236
6	10		P value summary	*		Mean	7.95	9.261
8	8		Significantly different (P < 0.05)?	Yes		Std. Deviation	2.385	2.824
7	9		One- or two-tailed P value?	Two-tailed		Std. Error of Mean	0.3772	0.4164
9	8		t, df	t=2.306, df=84
7	6					Lower 95% CI	7.187	8.422
5	4		How big is the difference?			Upper 95% CI	8.713	10.1
6	10		Mean of column A	7.95
4	7		Mean of column B	9.261
7	10		Difference between means (B - A) ± SEM	1.311 ± 0.5685
5	7		95% confidence interval	0.1804 to 2.441
6	10		R squared (eta squared)	0.05954
5	5
6	2		F test to compare variances
6	7		F, DFn, Dfd	1.402, 45, 39
5	5		P value	0.2844
5	7		P value summary	ns
4	6		Significantly different (P < 0.05)?	No
3	7
6	9		Data analyzed
10	4		Sample size, column A	40
7	8		Sample size, column B	46
7	9
7	5
7	8
4	8
6	4
6	6
2	4
8	12
6	7
	12
	6
	5
	11
	2
	8

## Sheet: Figure 6 I
Ctrl	Tom
29.6484	30.6047
29.5	28.1776						Ctrl	Tom
36.3743	32.3413		Table Analyzed	SV Diameter		Number of values	13	14
28.0465	29.6512
37.8698	25.6126		Column B	Tom		Minimum	28.05	23.81
31.6941	23.8084		vs.	vs.		25% Percentile	29.57	29.28
31.814	34.1356		Column A	Ctrl		Median	31.81	32.4
32.32	33.6905					75% Percentile	33.77	33.73
32.8968	32.7488		Unpaired t test			Maximum	37.87	39.72
32.6523	33.2643		P value	0.7005
29.3676	32.4533		P value summary	ns		Mean	32.11	31.59
34.6471	33.8672		Significantly different (P < 0.05)?	No		Std. Deviation	2.861	3.929
30.5952	39.7209		One- or two-tailed P value?	Two-tailed		Std. Error of Mean	0.7935	1.05
	32.2047		t, df	t=0.3891, df=25
						Lower 95% CI	30.38	29.32
			How big is the difference?			Upper 95% CI	33.84	33.86
			Mean of column A	32.11
			Mean of column B	31.59
			Difference between means (B - A) ± SEM	-0.5182 ± 1.332
			95% confidence interval	-3.261 to 2.225
			R squared (eta squared)	0.00602
			F test to compare variances
			F, DFn, Dfd	1.886, 13, 12
			P value	0.2812
			P value summary	ns
			Significantly different (P < 0.05)?	No
			Data analyzed
			Sample size, column A	13
			Sample size, column B	14

## Sheet: Figure 6 J
Ctrl	Tom
227.879	279.451
245.664	229.283						Ctrl	Tom
150.519	239.195		Table Analyzed	SV Density		Number of values	13	14
284.895	198.555
199.588	246.161		Column B	Tom		Minimum	148.4	144.2
217.31	242.751		vs.	vs.		25% Percentile	157.1	176.3
210.494	194.489		Column A	Ctrl		Median	199.6	211.8
148.501	178.791					75% Percentile	222.6	240.1
167.081	144.194		Unpaired t test			Maximum	284.9	279.5
163.679	176.181		P value	0.469
211.323	165.564		P value summary	ns		Mean	197.9	209.2
148.448	176.279		Significantly different (P < 0.05)?	No		Std. Deviation	41.55	38.31
196.896	224.966		One- or two-tailed P value?	Two-tailed		Std. Error of Mean	11.52	10.24
	232.485		t, df	t=0.7353, df=25
						Lower 95% CI	172.8	187
			How big is the difference?			Upper 95% CI	223	231.3
			Mean of column A	197.9
			Mean of column B	209.2
			Difference between means (B - A) ± SEM	11.30 ± 15.37
			95% confidence interval	-20.35 to 42.95
			R squared (eta squared)	0.02117
			F test to compare variances
			F, DFn, Dfd	1.176, 12, 13
			P value	0.7725
			P value summary	ns
			Significantly different (P < 0.05)?	No
			Data analyzed
			Sample size, column A	13
			Sample size, column B	14
