# Supplementary material for: The decoy SNARE Tomosyn sets tonic versus phasic release properties and is required for homeostatic synaptic plasticity
Source: eLife journal article supplement (doi:10.7554/elife.72841), 2021-10-29
Supplement: supp [file elife-72841-supp-v1.zip › elife_poa_e72841_Figure_7_figure_supplement_1_source_data_1.xlsx]

## Sheet: Figure 7 Supplemental 1 C
Control	Tom
61.2765	44.3286
82.8745	59.7634						Control	Tom
54.143	58.2712		Table Analyzed	Steady State		Number of values	18	18
77.0641	92.6608
59.1562	56.0052		Column B	Tom		Minimum	32.73	18.96
48.5735	55.4028		vs.	vs.		25% Percentile	55.96	46.93
32.7282	48.2715		Column A	Control		Median	62.51	53.85
76.3065	47.618					75% Percentile	75.32	58.64
56.582	53.0174		Unpaired t test			Maximum	82.87	92.66
74.986	44.8859		P value	0.1031
71.0806	49.0797		P value summary	ns		Mean	62.36	54.29
79.9211	44.6706		Significantly different (P < 0.05)?	No		Std. Deviation	14.12	14.79
35.6095	18.9641		One- or two-tailed P value?	Two-tailed		Std. Error of Mean	3.329	3.486
63.7343	54.6836		t, df	t=1.675, df=34
56.5614	50.7062					Lower 95% CI	55.34	46.94
57.8468	70.5254		How big is the difference?			Upper 95% CI	69.39	61.64
63.9475	70.7303		Mean of column A	62.36
70.1781	57.6396		Mean of column B	54.29
			Difference between means (B - A) ± SEM	-8.075 ± 4.820
			95% confidence interval	-17.87 to 1.721
			R squared (eta squared)	0.07625
			F test to compare variances
			F, DFn, Dfd	1.096, 17, 17
			P value	0.8517
			P value summary	ns
			Significantly different (P < 0.05)?	No
			Data analyzed
			Sample size, column A	18
			Sample size, column B	18

## Sheet: Figure 7 Supplemental 1 D
Ctrl RRP	Tom RRP
12565.9	33058.9
34822.2	21338						Ctrl RRP	Tom RRP
10477.5	28255.8		Table Analyzed	RRP Elmqvist		Number of values	18	18
16917.2	47230.2
14619.7	30514.4		Column B	Tom RRP		Minimum	10477	13554
31371.7	46467.7		vs.	vs.		25% Percentile	14163	15674
19867.1	14418.8		Column A	Ctrl RRP		Median	19041	28956
26582.4	15996.3					75% Percentile	27212	36426
18624.8	26819.3		Unpaired t test			Maximum	34822	47230
12792.6	13553.5		P value	0.015
21191	36074.3		P value summary	*		Mean	20333	28189
29101	37481.7		Significantly different (P < 0.05)?	Yes		Std. Deviation	7314	10763
16643.4	14706.3		One- or two-tailed P value?	Two-tailed		Std. Error of Mean	1724	2537
22923.6	14614.7		t, df	t=2.561, df=34
15822.2	25871					Lower 95% CI	16696	22837
12261.9	29656.2		How big is the difference?			Upper 95% CI	23970	33541
19457.7	33653.9		Mean of column A	20333
29954.7	37686.8		Mean of column B	28189
			Difference between means (B - A) ± SEM	7856 ± 3067
			95% confidence interval	1622 to 14089
			R squared (eta squared)	0.1617
			F test to compare variances
			F, DFn, Dfd	2.166, 17, 17
			P value	0.1209
			P value summary	ns
			Significantly different (P < 0.05)?	No
			Data analyzed
			Sample size, column A	18
			Sample size, column B	18
