# Supplementary material for: The decoy SNARE Tomosyn sets tonic versus phasic release properties and is required for homeostatic synaptic plasticity
Source: eLife journal article supplement (doi:10.7554/elife.72841), 2021-10-29
Supplement: supp [file elife-72841-supp-v1.zip › elife_poa_e72841_Figure_7_source_data_1.xlsx]

## Sheet: Figure 7 C
Control	Tom
106.875	103.814
177.932	106.608						Control	Tom
91.8381	124.293		Table Analyzed	IRP Semi Steady State (30)		Number of values	18	18
128.967	151.75
101.73	110.705		Column B	Tom		Minimum	65.02	52.9
89.4074	134.785		vs.	vs.		25% Percentile	91.23	93.7
69.896	91.9501		Column A	Control		Median	109	106.8
156.665	88.3911					75% Percentile	133.1	131.3
101.751	104.228		Unpaired t test			Maximum	177.9	151.7
111.195	83.2962		P value	0.7209
124.353	112.831		P value summary	ns		Mean	113.8	110.4
156.994	106.933		Significantly different (P < 0.05)?	No		Std. Deviation	30.62	25.3
65.0222	52.8972		One- or two-tailed P value?	Two-tailed		Std. Error of Mean	7.217	5.964
115.053	94.2898		t, df	t=0.3602, df=34
97.8402	97.5686					Lower 95% CI	98.55	97.82
86.483	148.126		How big is the difference?			Upper 95% CI	129	123
120.411	130.19		Mean of column A	113.8
145.487	144.55		Mean of column B	110.4
			Difference between means (B - A) ± SEM	-3.372 ± 9.362
			95% confidence interval	-22.40 to 15.65
			R squared (eta squared)	0.003801
			F test to compare variances
			F, DFn, Dfd	1.464, 17, 17
			P value	0.4397
			P value summary	ns
			Significantly different (P < 0.05)?	No
			Data analyzed
			Sample size, column A	18
			Sample size, column B	18

## Sheet: Figure 7 D
Ctrl	Tom
3714.1	4238.14
6331.41	4118.3						Ctrl	Tom
3675.83	4843.33		Table Analyzed	Cumulative quanta (30)		Number of values	18	18
4631.97	5897.72
3798.87	5249.75		Column B	Tom		Minimum	2843	2174
3873.34	4969.67		vs.	vs.		25% Percentile	3705	4084
3053.44	3979.21		Column A	Ctrl		Median	3899	4341
5186.33	3384.29					75% Percentile	4771	5412
3975.31	4229.05		Unpaired t test			Maximum	6331	6714
3787.35	3374.96		P value	0.2951
4582.47	4647.05		P value summary	ns		Mean	4247	4615
5793.56	4259.21		Significantly different (P < 0.05)?	No		Std. Deviation	931.3	1137
2843	2173.52		One- or two-tailed P value?	Two-tailed		Std. Error of Mean	219.5	268.1
3828.81	4174.81		t, df	t=1.063, df=34
3496.36	4423.09					Lower 95% CI	3783	4049
3924.01	6049.55		How big is the difference?			Upper 95% CI	4710	5181
4557.02	6714.12		Mean of column A	4247
5384.51	6344.82		Mean of column B	4615
			Difference between means (B - A) ± SEM	368.5 ± 346.5
			95% confidence interval	-335.7 to 1073
			R squared (eta squared)	0.03219
			F test to compare variances
			F, DFn, Dfd	1.492, 17, 17
			P value	0.4179
			P value summary	ns
			Significantly different (P < 0.05)?	No
			Data analyzed
			Sample size, column A	18
			Sample size, column B	18

## Sheet: Figure 7 G
Tom13A-GFP 1B	Tom13A-GFP 1S
2500	1460
4680	2120						Tom13A-GFP 1B	Tom13A-GFP 1S
6870	3260		Table Analyzed	Tom Intensity		Number of values	12	12
4680	3360
7050	2740		Column B	Tom13A-GFP 1S		Minimum	2170	898
6610	2290		vs.	vs.		25% Percentile	3233	1663
4110	1790		Column A	Tom13A-GFP 1B		Median	4680	2180
3300	898					75% Percentile	6258	2830
3210	1760		Unpaired t test			Maximum	7050	3360
2170	1630		P value	0.0001
4830	2240		P value summary	***		Mean	4601	2201
5200	2860		Significantly different (P < 0.05)?	Yes		Std. Deviation	1646	747.2
			One- or two-tailed P value?	Two-tailed		Std. Error of Mean	475.1	215.7
			t, df	t=4.600, df=22
						Lower 95% CI	3555	1726
			How big is the difference?			Upper 95% CI	5647	2675
			Mean of column A	4601
			Mean of column B	2201
			Difference between means (B - A) ± SEM	-2400 ± 521.8
			95% confidence interval	-3482 to -1318
			R squared (eta squared)	0.4902
			F test to compare variances
			F, DFn, Dfd	4.852, 11, 11
			P value	0.0145
			P value summary	*
			Significantly different (P < 0.05)?	Yes
			Data analyzed
			Sample size, column A	12
			Sample size, column B	12

## Sheet: Figure 7 I
Ctrl 1b	Tom 1b	Ctrl 1s	Tom 1s
-191.814	-692.775	-113.302	-172.286
-164.717	-929.531	-144.73	-141.809																				Ctrl 1b	Tom 1b	Ctrl 1s	Tom 1s
-189.057	-760.907	-280.344	-91.8793		Table Analyzed	Area						Number of families	1									Number of values	14	15	11	11
-220.881	-996.735	-130.863	-103.165		Data sets analyzed	A-D						Number of comparisons per family	6
-158.386	-694.569	-101.9	-69.0085									Alpha	0.05									Minimum	-291.6	-996.7	-280.3	-211.9
-185.751	-690.11	-68.1456	-133.492		ANOVA summary																	25% Percentile	-194.3	-694.6	-130.9	-172.3
-148.374	-637.975	-105.175	-128.692		F	118.4						Tukey's multiple comparisons test	Mean Diff.	95.00% CI of diff.	Below threshold?	Summary	Adjusted P Value					Median	-175.2	-638	-101.9	-128.7
-103.833	-595.025	-101.328	-184.361		P value	<0.0001						Ctrl 1b vs. Tom 1b	491.4	401.3 to 581.5	Yes	****	<0.0001	A-B				75% Percentile	-146.1	-595	-96.28	-69.01
-126.104	-460.532	-101.503	-211.927		P value summary	****						Ctrl 1b vs. Ctrl 1s	-54.58	-152.3 to 43.10	No	ns	0.4526	A-C				Maximum	-103.8	-460.5	-68.15	-24.91
-291.566	-474.591	-96.2814	-64.5716		Significant diff. among means (P < 0.05)?	Yes						Ctrl 1b vs. Tom 1s	-55.1	-152.8 to 42.58	No	ns	0.4442	A-D
-141.798	-596.024	-88.2646	-24.9109		R squared	0.8832						Tom 1b vs. Ctrl 1s	-546	-642.2 to -449.8	Yes	****	<0.0001	B-C				Mean	-175.7	-667.1	-121.1	-120.6
-201.636	-620.943											Tom 1b vs. Tom 1s	-546.5	-642.8 to -450.3	Yes	****	<0.0001	B-D				Std. Deviation	46.04	145.9	56.54	56.43
-147.494	-694.397				Brown-Forsythe test							Ctrl 1s vs. Tom 1s	-0.5213	-103.9 to 102.9	No	ns	>0.9999	C-D				Std. Error of Mean	12.31	37.67	17.05	17.01
-187.783	-555.784				F (DFn, DFd)	3.907 (3, 47)
	-606.416				P value	0.0143						Test details	Mean 1	Mean 2	Mean Diff.	SE of diff.	n1	n2	q	DF		Lower 95% CI	-202.2	-747.9	-159.1	-158.5
					P value summary	*						Ctrl 1b vs. Tom 1b	-175.7	-667.1	491.4	33.83	14	15	20.55	47		Upper 95% CI	-149.1	-586.3	-83.09	-82.64
					Are SDs significantly different (P < 0.05)?	Yes						Ctrl 1b vs. Ctrl 1s	-175.7	-121.1	-54.58	36.68	14	11	2.105	47
												Ctrl 1b vs. Tom 1s	-175.7	-120.6	-55.1	36.68	14	11	2.125	47
					Bartlett's test							Tom 1b vs. Ctrl 1s	-667.1	-121.1	-546	36.13	15	11	21.37	47
					Bartlett's statistic (corrected)	22.77						Tom 1b vs. Tom 1s	-667.1	-120.6	-546.5	36.13	15	11	21.39	47
					P value	<0.0001						Ctrl 1s vs. Tom 1s	-121.1	-120.6	-0.5213	38.81	11	11	0.01899	47
					P value summary	****
					Are SDs significantly different (P < 0.05)?	Yes
					ANOVA table	SS	DF	MS	F (DFn, DFd)	P value
					Treatment (between columns)	2943504	3	981168	F (3, 47) = 118.4	P<0.0001
					Residual (within columns)	389421	47	8286
					Total	3332925	50
					Data summary
					Number of treatments (columns)	4
					Number of values (total)	51

## Sheet: Figure 7 L
Ctrl 1b	Ctrl 1s	Tom 1b	Tom 1s
																							Ctrl 1b	Ctrl 1s	Tom 1b	Tom 1s
					Table Analyzed	All AZs						Number of families	1									Number of values	463	409	1075	346
	0.016188				Data sets analyzed	A-D						Number of comparisons per family	6
0.055312	0		0.0276867									Alpha	0.05									Minimum	0	0	0	0
0.06914	0.06475		0		ANOVA summary																	25% Percentile	0.01383	0.04856	0.05663	0.02769
0	0.016188		0		F	73.99						Tukey's multiple comparisons test	Mean Diff.	95.00% CI of diff.	Below threshold?	Summary	Adjusted P Value					Median	0.0415	0.1295	0.1434	0.1066
0.179765	0.016188		0		P value	<0.0001						Ctrl 1b vs. Ctrl 1s	-0.09701	-0.1217 to -0.07233	Yes	****	<0.0001	A-B				75% Percentile	0.09357	0.2459	0.2725	0.2213
0.06914	0.016188		0		P value summary	****						Ctrl 1b vs. Tom 1b	-0.1153	-0.1355 to -0.09504	Yes	****	<0.0001	A-C				Maximum	0.5531	0.8023	0.9406	0.5948
0	0.016188		0.0276867		Significant diff. among means (P < 0.05)?	Yes						Ctrl 1b vs. Tom 1s	-0.07047	-0.09631 to -0.04463	Yes	****	<0.0001	A-D
0.013828	0.080938		0		R squared	0.0884						Ctrl 1s vs. Tom 1b	-0.01825	-0.03938 to 0.002874	No	ns	0.1178	B-C				Mean	0.06938	0.1664	0.1846	0.1398
0.027656	0		0.0276867									Ctrl 1s vs. Tom 1s	0.02654	-2.203e-005 to 0.05310	No	ns	0.0503	B-D				Std. Deviation	0.08239	0.1514	0.1612	0.125
0.027656	0		0.0830601		Brown-Forsythe test							Tom 1b vs. Tom 1s	0.04479	0.02231 to 0.06727	Yes	****	<0.0001	C-D				Std. Error of Mean	0.003829	0.007488	0.004917	0.00672
0.013828	0		0		F (DFn, DFd)	56.68 (3, 2289)
0.013828	0.1295		0.0276867		P value	<0.0001						Test details	Mean 1	Mean 2	Mean Diff.	SE of diff.	n1	n2	q	DF		Lower 95% CI	0.06186	0.1517	0.175	0.1266
0.027656	0.06475		0		P value summary	****						Ctrl 1b vs. Ctrl 1s	0.06938	0.1664	-0.09701	0.009598	463	409	14.29	2289		Upper 95% CI	0.0769	0.1811	0.1943	0.1531
0	0		0		Are SDs significantly different (P < 0.05)?	Yes						Ctrl 1b vs. Tom 1b	0.06938	0.1846	-0.1153	0.007862	463	1075	20.73	2289
0.165937	0.145688		0.276867									Ctrl 1b vs. Tom 1s	0.06938	0.1398	-0.07047	0.01005	463	346	9.915	2289
0.013828	0.032375		0		Bartlett's test							Ctrl 1s vs. Tom 1b	0.1664	0.1846	-0.01825	0.008217	409	1075	3.141	2289
0.013828	0.145688		0.0830601		Bartlett's statistic (corrected)	247.8						Ctrl 1s vs. Tom 1s	0.1664	0.1398	0.02654	0.01033	409	346	3.633	2289
0.055312	0		0.16612		P value	<0.0001						Tom 1b vs. Tom 1s	0.1846	0.1398	0.04479	0.008742	1075	346	7.246	2289
0.055312	0		0.0553734		P value summary	****
0.055312	0.032375		0.0553734		Are SDs significantly different (P < 0.05)?	Yes
0.096797	0		0.110747
0.06914	0.048563		0		ANOVA table	SS	DF	MS	F (DFn, DFd)	P value
0	0.06475		0.0553734		Treatment (between columns)	4.44	3	1.48	F (3, 2289) = 73.99	P<0.0001
0.013828	0.19425		0		Residual (within columns)	45.79	2289	0.02001
0.013828	0.210438		0		Total	50.23	2292
0.06914	0.32375		0.221494
0.221249	0.226625		0		Data summary
0.082968	0.048563		0.0553734		Number of treatments (columns)	4
0.027656	0.161875		0		Number of values (total)	2293
0.055312	0.080938		0.0276867
0.304218	0.178063		0.0276867
0	0.145688		0
0.013828	0.291375		0.0830601
0.027656	0.3885		0.0553734
0.013828	0.501813		0.0553734
0.138281	0.097125		0.0276867
0.06914	0.1295		0
0.138281	0.032375		0.0553734
0.096797	0.080938		0.0276867
0.041484	0.080938		0
0.013828	0.06475
0.041484	0	0.0168889
0.553123	0.048563	0.152
0.248905	0.097125	0.388444
0.221249	0.210438	0.101333
0.013828	0.275188	0.337778
0.248905	0.259	0.439111
0.013828	0.048563	0.0675556
0.082968	0.145688	0.304
0.055312	0.06475	0.337778
0.110625	0.032375	0.101333
0.013828	0	0.388444
0.041484	0.016188	0.0844444
0.401014	0.032375	0.135111
0.345702	0	0.101333
0.055312	0.226625	0.118222
0.027656	0.145688	0.168889
0.013828	0.080938	0.0168889
0.055312	0.016188	0.135111
0.124453	0.032375	0.0506667
0.013828	0.145688	0
0	0.404688	0.0675556
	0.113313	0.101333
	0.19425	0.236444
	0.275188	0.337778
	0.1295	0.185778
	0.339938	0.354667
	0.210438	0.354667
	0.32375	0.185778
	0.485625	0.0337778
	0.06475	0.253333
	0.226625	0.101333
	0.210438	0.405333
	0	0.304
	0.016188	0.304
	0	0.0506667
	0	0.0337778
	0	0.0675556
	0.032375	0
	0.06475	0.101333
	0.097125	0.118222
	0.016188	0.152
	0.32375	0.0168889
	0.19425	0.101333
	0.032375	0.219556
	0.032375	0.0337778
	0.113313	0.101333
	0.210438	0
	0.437063	0
	0.178063	0.354667
	0.307563	0.253333
	0.1295	0.0168889
	0.080938	0.0337778
	0.016188	0.270222
	0.420875	0.320889
	0.161875	0.253333
	0.048563	0.287111
	0.113313
	0.016188
	0.016188		0.0389744
	0.06475		0
	0.145688		0.0389744
	0.032375		0.214359
	0.19425		0.194872
	0.06475		0
	0.06475		0
	0.161875		0.0194872
	0.307563		0
	0.19425		0.0194872
	0.1295		0.409231
	0.145688		0.0194872
	0.259		0.13641
	0.242813		0.0194872
	0.178063		0.155897
	0.178063		0.350769
	0.032375		0.311795
	0.080938		0
	0.178063		0.0389744
	0.1295		0.0194872
	0.226625		0.0974359
	0.016188		0.116923
	0		0.0584615
	0.080938		0.155897
	0.19425		0
	0.145688		0.155897
	0.161875		0.0194872
	0.242813		0.0779487
	0.339938		0.194872
	0.032375		0.214359
	0.016188		0.0194872
	0.06475		0.350769
	0.06475		0.116923
	0.06475		0.116923
	0.048563		0.0389744
	0.259		0.13641
	0.210438		0.13641
	0.080938		0.0584615
	0.113313		0.0584615
	0.145688		0.0389744
	0.032375		0.0974359
	0.06475		0.0194872
	0.016188		0.155897
	0.097125		0.0194872
	0.145688		0.331282
	0.097125		0
	0.275188		0.0389744
	0.097125		0.331282
	0.226625		0.0974359
	0.113313		0.0389744
	0.048563		0.233846
	0		0.175385
	0		0.0974359
	0		0.175385
	0.048563		0
	0.032375		0.0194872
	0		0.331282
			0.0584615
			0.13641
			0.175385
0.056142			0.0389744
0.037428			0.0974359
0.093569			0.0194872
0.018714			0.155897
0			0.311795
0.018714			0.389744
0.093569			0.0974359
0.018714			0
0			0.116923
0.112283
0		0.114711
0.018714		0.325016
0.056142		0.143389
0.149711		0.143389
0.056142		0.248541
0.074855		0.200745
0.093569		0.143389
0.056142		0.191186
0.056142		0
0.074855		0.0286778
0.056142		0.0764742
0.056142		0.066915
0		0.0191186
0.093569		0.200745
0.056142		0.229423
0.037428		0.277219
0.130997		0.468405
0.130997		0.334575
0.056142		0.066915
0.056142		0.0860335
0.037428		0.066915
0.074855		0.066915
0.168425		0.143389
0		0.344134
0.112283		0.248541
0.018714		0.0573557
0.018714		0.0286778
0.018714		0.0764742
0.037428		0.315456
0.112283		0.229423
0.112283		0.143389
0.018714		0.420608
0		0.334575
0.093569		0.430168
0.205853		0.00955928
0.112283		0.0191186
0.018714		0.066915
0.018714		0
0.056142		0.0573557
		0.066915
		0.066915
0.01113		0.0382371
0		0
0.01113		0
0.022261		0.40149
0.01113		0.296338
0		0.210304
0.01113		0.0860335
0		0.258101
0		0.105152
0.055652		0.296338
0.01113		0.162508
0.133565		0.143389
0.044522		0.13383
0.033391		0.305897
0.01113		0.0860335
0.033391		0.219863
0.022261		0.0573557
0.033391		0.0955928
0		0.162508
0.022261		0.0286778
0.044522		0.066915
0.01113		0.0477964
0		0.00955928
0.077913		0.0191186
0		0.0191186
0.022261		0.00955928
0.033391		0.0573557
0.066783		0.066915
0.111304
0.133565
0.022261
0			0.154
0.044522			0.102667
0.01113			0
0.01113			0.436333
0.022261			0.0256667
0			0.0513333
0.01113			0.0256667
0.022261			0.154
0.022261			0.128333
0.022261			0.0513333
0.155826			0
0.044522			0.128333
0			0.256667
0.077913			0.205333
0			0.436333
0			0.154
0.233739			0.205333
0.26713			0.102667
0.089043			0.436333
0.222609			0.256667
0.066783			0.154
0.111304			0.154
0.033391			0.282333
0.055652			0.436333
0.066783			0.256667
0.055652			0.282333
0.01113			0
0			0.0513333
0			0.077
0			0.077
0			0
0.01113			0.0256667
0			0
0			0.154
0.01113			0.0256667
0			0
0			0.077
0			0.205333
0			0
0.111304			0.256667
0.01113			0.0256667
0.033391			0.0256667
0.166957			0.102667
0.233739			0
0.033391			0.0256667
0.055652			0.102667
0.256			0
0.077913			0
0			0.077
0.022261			0.179667
0.111304			0.102667
			0.179667
			0.154
	0.076434		0.0256667
0.08719	0.229303		0.359333
0.104628	0.127391		0.102667
0.08719	0.101913		0.154
0.052314	0.050956
0.069752	0.050956	0.041357
0.069752	0.076434	0
0.156942	0.025478	0.041357
0.174381	0.178347	0.165428
0.017438	0	0.206785
0.069752	0.101913	0.248142
0.069752	0.025478	0.827141
0.017438	0.127391	0.372213
0.017438	0.050956	0.41357
0.017438	0.101913	0.289499
0.034876	0.050956	0.785784
0.034876	0.101913	0.0827141
0.069752	0.101913	0.289499
0	0.229303	0.454927
0.017438	0.025478	0.620355
0.052314	0.076434	0
0.017438	0.254781	0
0.139504	0.178347	0.248142
0.069752	0.101913	0.124071
0.069752	0.025478	0.330856
0	0.152869	0.206785
0.08719	0.254781	0.124071
0.052314	0.076434	0.537641
0.069752	0.127391	0.41357
0.017438	0.076434	0.41357
0.052314	0.101913	0.454927
0.034876	0.076434	0.537641
0.017438	0.025478	0
0.069752	0.076434	0.124071
0	0.305738	0.124071
0.08719	0.076434	0.041357
0	0.050956	0.330856
0.052314		0.454927
0.034876		0.206785
0.034876		0.289499
0.034876		0.909855
0.034876		0.454927
0.017438		0
0.052314		0.041357
0.052314		0.330856
0		0.124071
0.191819		0.496284
0		0.206785
0.174381		0.0827141
0		0.0827141
0.017438		0.124071
		0
		0.248142
		0.372213
	0.550879	0.454927
0.429614	0.314788	0.454927
0.080553	0.367253	0.206785
0.161105	0.419717	0.454927
0.187956	0.367253	0.330856
0.46989	0.157394	0.206785
0.32221	0.44595	0.041357
0	0.052465	0.041357
0.187956	0.288556	0.165428
0.067127	0.131162	0
0.308785	0.655808	0.289499
0.214807	0.052465	0.248142
0.255083	0.288556	0.0827141
0.080553	0.419717	0.124071
0.349061	0.44595	0
0.214807	0.44595	0.041357
0.040276	0.262323	0.41357
0.093978	0.026232	0.0827141
0.214807	0
0.040276	0.131162
0	0.078697
0.013425	0.026232	0.0108291
0.013425	0	0.0433164
0.040276	0.367253	0.0433164
0	0.209859	0
0.040276	0.367253	0.0866328
0.093978	0.183626	0.140778
0.107403	0.419717	0.0216582
0.228232	0.209859	0.129949
0.026851	0.026232	0.205753
0.32221	0.288556	0.0216582
0.040276	0.44595	0.0433164
0.013425	0.052465	0.0108291
0.013425	0.209859	0
0.013425	0.026232	0.184095
0	0.262323	0
0.026851	0.236091	0.0866328
0.053702	0.157394	0.0541455
0.214807	0	0
0.013425	0.314788	0.0433164
0.013425	0.236091	0.0974619
0.053702	0.209859	0.314044
0	0.026232	0.270728
0.134254	0.131162	0.0324873
0.134254		0.48731
0		0
0		0
0.14768		0.129949
0.053702		0
0.255083		0.0108291
0.080553		0
0.093978		0
0.026851		0.270728
		0.129949
		0.0108291
	0.122882	0.0541455
0.136535	0	0.227411
0.040961	0.013654	0.151607
0.027307	0	0.140778
0	0	0
0.054614	0.218457	0.216582
0.068268	0.054614	0.259898
0.136535	0.013654	0.0866328
0.191149	0.395953	0.0758037
0	0	0.129949
0	0	0
0.027307	0.191149	0.0216582
0.013654	0	0
0.027307	0.040961	0.498139
0	0.559795	0.0324873
0	0.191149	0.324873
0	0.300378	0.162437
0.054614	0.204803	0.433164
0	0.314031	0.0541455
0.054614	0.286724	0.162437
0	0.095575	0.140778
0.095575	0.436913	0
0.122882	0.259417	0.0649746
0	0.23211	0.400677
0.177496	0.027307	0.184095
0.327685	0.46422	0.0324873
0.068268	0.054614	0.0866328
0.068268	0.395953	0.0324873
0.027307	0.245764	0.184095
0.136535	0.477874	0.0866328
0.191149	0.395953	0.129949
0.027307	0.040961	0.0974619
0	0.259417	0.129949
0.040961	0.273071	0.173266
0.150189	0.068268	0
0	0.368645	0.162437
0.163842	0.081921	0.0541455
0.040961	0.245764	0.0108291
0.068268	0.341338	0.23824
0.150189	0.518834	0.0974619
0.191149	0.518834	0.0324873
0.505181	0.245764	0
0.013654	0.368645	0.194924
0	0.218457	0.0758037
0.081921	0.368645	0.0974619
0.177496	0.027307	0.36819
0.286724	0.218457	0.140778
0.163842		0.0758037
0.040961		0.498139
0.040961		0.389848
0.054614		0.270728
0.218457
	0.663969	0.130802
0.35965	0.331985	0.239803
0.110662	0.304319	0.272504
0.138327	0.15216	0.174402
0.027665	0.082996	0.0327004
0.110662	0.193658	0.174402
0.055331	0.248989	0.239803
0.179825	0.484144	0.109001
0.013833	0.318152	0.0218003
0.055331	0.027665	0.370605
0.069163	0.497977	0.0327004
0.041498	0.608639	0.152602
0.027665	0.705467	0.294304
0.027665	0.580973	0.152602
0.027665	0.539475	0.076301
0.082996	0.069163	0.0545007
0	0.013833	0.196203
0.069163	0.027665	0.207103
0	0.055331	0.119902
0.041498	0.221323	0.512307
0	0.124494	0.305204
0.013833	0.138327	0.239803
0	0.262821	0.152602
0.193658	0.013833	0.0654008
0.082996	0	0.545007
0	0.470312	0.250703
0.055331	0.580973	0.0545007
0.15216	0.290487	0.239803
0.013833	0.802296	0.0436006
0.096829	0.290487	0.370605
0.096829	0.276654	0.076301
0.110662	0.165992	0.261603
0.110662	0.110662	0.0327004
0.027665	0.013833	0.250703
0.027665	0.069163	0.109001
0.013833	0	0.0218003
0.055331	0	0.348805
0.235156	0.013833	0.0981013
0	0.069163	0
0	0.055331	0
0.138327	0.276654	0.228903
0.013833	0.525642	0.076301
0	0.401148	0.0109001
0.069163	0.553308	0.425105
0.027665		0.207103
0.20749		0.272504
0.055331		0.370605
0.138327		0.0654008
0.235156		0.0545007
0.041498		0.436006
0.138327		0.0872011
0		0.0436006
0.138327		0.0545007
0.041498		0.109001
0.013833		0.076301
0.124494		0.0545007
0.013833		0.588608
0.013833		0.228903
0.082996		0.316104
0.096829		0.174402
0.110662		0.75211
0.110662		0.196203
0.027665		0.0327004
0.082996		0.141702
0		0.228903
0.138327		0.218003
0		0.152602
0.082996		0.403305
0.15216		0.348805
0.027665
0
0.069163
0
0		0.00954316
0.041498		0.238579
0.055331		0.0381726
		0.0858884
	0.026527	0.0668021
	0.013264	0
	0.132635	0.0286295
	0	0.0381726
	0.013264	0.0190863
	0.397906	0.324467
	0.026527	0.00954316
	0.039791	0.0286295
	0.291798	0
	0.066318	0.00954316
	0.132635	0
	0.079581	0.0381726
	0.159162	0.0668021
	0.079581	0
	0.119372	0
	0.013264	0
	0.265271	0
	0.384642	0
	0.172426	0.0477158
	0.026527	0.0190863
	0.198953	0.00954316
	0.305061	0
	0.172426	0
	0.238743	0.0286295
	0.305061	0.0286295
	0.45096	0.0286295
	0.198953	0.0477158
	0.185689	0.00954316
	0.238743	0.0190863
	0.331588	0.171777
	0.22548	0.104975
	0.013264	0.0190863
	0.159162	0.0858884
	0.504014	0.0954316
	0.172426	0
	0.159162	0.0286295
		0.0668021
		0.0763453
		0.334011
	0.081985	0.257665
0	0.368932	0.190863
0.054657	0.122977	0.0190863
0.013664	0.232291	0.229036
0.040992	0.136641	0.152691
0.040992	0.068321	0.229036
0.054657	0.16397	0.229036
0.081985	0.081985	0.114518
0.095649	0.027328	0.18132
0.054657	0.122977	0.0286295
0.081985	0.054657	0.057259
0.013664	0.218626	0.124061
0.122977	0.245955	0.229036
0.068321	0.314275	0.219493
0.081985	0.204962	0.0381726
0.081985	0.068321	0.0190863
0.013664	0.177634	0.229036
0.040992	0.204962	0.295838
0.095649	0.081985	0.104975
0.054657	0.040992	0.124061
0.013664	0.191298	0.0858884
0.054657	0.122977	0.229036
0.040992	0.368932	0.104975
0.122977	0.382596	0.0477158
0.068321	0.136641	0.143147
0.054657	0.273283	0.238579
0.027328	0.191298	0.696651
0.081985	0.122977	0.114518
0	0.245955	0.75391
0	0.136641	0
0	0.095649	0.0286295
0	0.56023	0.381726
0.027328	0.068321	0.00954316
0	0.040992	0.143147
0.081985	0.232291	0.114518
0.068321	0.16397	0.458072
0.013664	0.259619	0.410356
0.054657	0.232291	0.0381726
0.054657	0	0.200406
0.013664	0.054657	0.0668021
0.027328	0.040992	0.152691
0.013664	0.081985	0.582133
0	0.040992	0.305381
0.013664	0.040992	0.276752
	0.040992	0
		0.0668021
		0.114518
		0.0858884
		0.496244
		0.190863
		0.0190863
		0.143147
		0.324467
		0.353097
		0.314924
		0.0477158
		0.00954316
		0
		0.0190863
		0.133604
		0.0286295
		0.0477158
		0.438985
		0.057259
		0.162234
		0.324467
		0.200406
		0.314924
		0.0477158
		0.114518
		0
		0.190863
		0.0381726
		0.0763453
		0.620305
		0.0286295
		0.314924
		0.18132
		0.610762
		0.238579
		0.0954316
		0.18132
		0.658478
		0.124061
		0.238579
		0.20995
		0.238579
		0.190863
		0.200406
		0.248122
		0.276752
		0.448529
		0
		0.305381
		0.219493
		0.0858884
		0.353097
		0.057259
		0.0858884
		0.324467
		0.143147
		0.133604
		0.0190863
		0.171777
		0.229036
		0.057259
		0.0286295
		0.162234
		0.0668021
		0.0286295
		0.238579
		0.0190863
		0.057259
		0.00954316
		0.057259
		0.124061
		0.324467
		0.171777
		0.104975
		0.248122
		0.0477158
		0.114518
		0.0381726
		0.00954316
		0.0276654
		0.193658	0.138327
		0.179825	0.235156
		0.193658	0.165992
		0.20749	0.0829962
		0.179825	0.470312
		0.0414981	0.235156
		0.0138327	0.414981
		0.124494	0.318152
		0.235156	0.290487
		0.0276654	0.0276654
		0.0691635	0.0829962
		0	0.0553308
		0.0414981	0.20749
		0.0553308	0.138327
		0.0276654	0.248989
		0.124494	0.387315
		0.15216	0.262821
		0.567141	0.318152
		0.0691635	0.594806
		0.0691635	0
		0.0276654	0.331985
		0.15216	0.428814
		0.290487	0.0691635
		0.401148	0.276654
		0.235156	0.124494
		0.0414981	0.248989
		0.165992	0.0414981
		0.35965	0.0553308
		0.345817	0.428814
		0.373483	0.138327
		0.221323	0.497977
		0.262821	0.428814
		0.0691635	0.373483
		0.221323	0.0968289
		0.193658	0
		0.387315	0.0138327
		0.345817	0.0276654
		0.138327	0
		0.124494	0
		0.248989	0.0553308
		0.165992	0.0276654
		0.414981	0.165992
		0.345817	0.0138327
		0.373483	0.0968289
		0	0.0138327
		0.124494	0.0276654
		0.0553308	0.0138327
		0.0691635	0.318152
		0.940623	0.0829962
		0.0138327	0.138327
		0.0276654	0.0276654
		0.0414981	0.304319
		0.235156
		0.760798
		0.221323
		0.262821
		0.345817
		0.0691635
		0.497977
		0.20749
		0.0968289
		0.138327
		0.663969
		0.276654
		0.179825
		0.442646
		0.262821
		0.193658
		0.0276654
		0.622471
		0.567141
		0.221323
		0.138327
		0.442646
		0.414981
		0.373483
		0.15216
		0.428814
		0.345817
		0.0553308
		0.345817
		0.0691635
		0.248989
		0.705467
		0.331985
		0.235156
		0.0968289
		0.179825
		0.0414981
		0.110662
		0.193658
		0.235156
		0.580973
		0.20749
		0.262821
		0.124494
		0.414981
		0.138327
		0.276654
		0.138327
		0.0276654
		0.290487
		0.124494
		0.290487
		0.165992
		0.0553308
		0.0553308
		0.0691635
		0.0829589
		0.179744
		0.138265
		0.207397
		0.318009
		0.0553059
		0.179744
		0.442447
		0.0414795
		0.152091
		0.124438
		0.0138265
		0.138265
		0.0691324
		0.304183
		0.110612
		0.290356
		0.414795
		0.193571
		0.262703
		0.414795
		0.165918
		0.387142
		0.165918
		0.318009
		0.193571
		0.027653
		0.0691324
		0.138265
		0.290356
		0.483927
		0.221224
		0
		0.110612
		0.414795
		0.124438
		0.262703
		0.179744
		0.138265
		0.138265
		0.442447
		0.0553059
		0.0967854
		0.138265
		0.165918
		0.345662
		0.138265
		0.373315
		0.387142
		0.359489
		0.414795
		0.483927
		0.207397
		0.525406
		0.649845
		0.165918
		0.331836
		0.207397
		0.331836
		0.152091
		0.400968
		0.207397
		0.110612
		0.497753
		0.0967854
		0.0691324
		0.27653
		0.0967854
		0.553059
		0.497753
		0.027653
		0.193571
		0.373315
		0.0691324
		0.0829589
		0.0691324
		0.165918
		0.0691324
		0.0137962
		0.055185
		0.22074
		0.0689812
		0.0137962
		0.193147
		0.11037
		0.151759
		0.593239
		0.0137962
		0.124166
		0.0275925
		0.303517
		0.151759
		0.0965737
		0.206944
		0.137962
		0.0827775
		0.248332
		0.137962
		0.275925
		0.248332
		0.289721
		0.275925
		0.055185
		0.0413887
		0.317314
		0.22074
		0.055185
		0.179351
		0.0827775
		0.262129
		0.262129
		0.193147
		0.607035
		0.234536
		0.427684
		0.400091
		0.0965737
		0.0965737
		0.44148
		0.22074
		0.482869
		0.262129
		0.427684
		0.0689812
		0.0827775
		0.0965737
		0.0689812
		0.0689812
		0.11037
		0.055185
		0.193147
		0.22074
		0.44148
		0.0827775
		0.593239
		0.0965737
		0.0413887
		0.137962
		0.496665
		0.372499
		0.303517
		0.124166
		0.179351
		0.303517
		0.0413887
		0.248332
		0.0137962
		0.0275925
		0.0689812
		0.22074
		0.0413887
		0.179351
		0.289721
		0.565646
		0.689812
		0.165555
		0.66222
		0.275925
		0.193147
		0.786386
		0.151759
		0.358702
		0.386295
		0.717405
		0.469072
		0.165555
		0.248332
		0.607035
		0.248332
		0.344906
		0.179351
		0.0275925
		0.137962
		0.455276
		0.0827775
		0.289721
		0.055185
		0.372499
		0.33111
		0.469072
		0.289721
		0.510461
		0.289721
		0.317314
		0.11037
		0.0965737
		0.344906
		0.193147
		0.055185
		0.22074
		0.055185
		0.0413887
		0.193147
		0.11037
		0.11037
		0.262129
		0.165555
		0.0843812
		0
		0.118134
		0.067505
		0.067505
		0.40503
		0.0337525
		0.168762
		0.202515
		0.0168762
		0.236267
		0.067505
		0.0337525
		0
		0.13501
		0.236267
		0.253144
		0.0168762
		0.27002
		0.388154
		0.0168762
		0.168762
		0.236267
		0.0168762
		0.0168762
		0
		0.320649
		0.0506287
		0.523163
		0.13501
		0.168762
		0.371277
		0.337525
		0.0506287
		0.0506287
		0.27002
		0.067505
		0.0843812
		0.067505
		0.0337525
		0.185639
		0.0337525
		0.168762
		0.0337525
		0.0506287
		0.0337525
		0.0337525
		0.202515
		0
		0.151886
		0.303772
		0.101257
		0.067505
		0.067505
		0.0843812
		0.067505
		0.286896
		0.0168762
		0.143802
		0.309727	0.188049
		0.19911	0.19911
		0.486714	0.0331851
		0.154864	0.0884935
		0.0884935	0.475652
		0.188049	0.210172
		0.154864	0.221234
		0.188049	0.110617
		0.0995552	0.165925
		0.154864	0.121679
		0.320789	0.121679
		0.320789	0
		0.154864	0.0884935
		0.0995552	0.0110617
		0.0884935	0.210172
		0.0110617	0.276542
		0.0995552	0.298665
		0.0110617	0.254419
		0.0110617	0.154864
		0.0774318	0.210172
		0.0221234	0.0995552
		0.409282	0.121679
		0.176987	0.0663701
		0.331851	0.143802
		0.121679	0.0663701
		0.188049	0.0442467
		0.298665	0
		0.0110617	0.0663701
		0.13274	0.0884935
		0.188049	0.110617
		0.121679	0.0995552
		0.13274
		0.0995552
		0.0995552
		0.530961
		0.188049
		0.188049
		0.0553084
		0.0221234
		0.0884935
		0.0221234
		0.298665
		0.376097
		0.464591
		0.154864
		0.0995552
		0.0884935
		0.530961
		0.19911
		0.110617
		0.0884935
		0.176987
		0.0221234
		0.0774318
		0.19911
		0.176987
		0.0663701
		0.0663701
		0.0553084
		0.0774318
		0.176987
		0.0774318
		0.320789
		0.0553084
		0.0995552
		0.143802
		0.431406
		0.143802
		0.0884935
		0.287604
		0.221234
		0.365036
		0.575208
		0.110617
		0.0995552
		0.331851
		0.486714
		0.0110617
		0.0138333
		0.0553333	0.276667
		0.0553333	0.332
		0.0691667	0.428833
		0.0691667	0.2905
		0.0138333	0.2075
		0.0138333	0.138333
		0.0138333	0.2905
		0.0415	0.166
		0.235167	0.249
		0.0968333	0.0276667
		0.0968333	0.221333
		0.110667	0.0138333
		0.235167	0.304333
		0.0276667	0.332
		0.083	0.345833
		0.235167	0.470333
		0.0276667	0.3735
		0.166	0.276667
		0.0968333	0.415
		0.0276667	0.152167
		0.511833	0.0415
		0.110667	0.0691667
		0.318167	0.0968333
		0.318167	0.235167
		0.235167	0.193667
		0.401167	0.152167
		0.152167	0.083
		0.179833	0.0691667
		0.083	0.304333
		0.2075	0.2075
		0.0276667	0
		0.415	0.0415
		0.401167	0.0968333
		0.345833	0.249
		0.401167	0.152167
		0.0276667	0.166
		0.0276667	0.0691667
		0.0276667	0.235167
		0.152167	0.2905
		0.0415	0.221333
		0.0138333	0.3735
			0.249
			0.2075
			0.110667
			0.083
			0.0553333
			0.0968333
			0.083
			0
			0.0415
			0.2905
			0.193667
			0.152167
			0.276667
			0.1245
			0.1245
			0.166
			0
			0.110667
		0.566338
		0.0943897	0.361145
		0.358681	0.342137
		0.132146	0.266107
		0.320925	0.190076
		0.0188779	0.0760305
		0.377559	0.114046
		0.585216	0.133053
		0.283169	0.304122
		0	0.190076
		0.0566338	0.342137
		0.0188779	0.0950382
		0.169901	0.247099
		0.207657	0.0570229
		0.377559	0.0570229
		0	0.285114
		0.0188779	0.228092
		0.188779	0.0190076
		0.188779	0.171069
		0.54746	0.361145
		0.453071	0.209084
		0.660728	0.0190076
		0.490826	0.228092
		0.528582	0.209084
		0.377559	0.266107
		0.54746	0.0380153
		0.132146	0.0760305
		0.0566338	0.247099
		0.113268	0.209084
		0.0188779	0.247099
		0.245413	0.190076
		0.245413	0.247099
		0.302047	0.114046
		0.358681	0.114046
		0.188779	0.0950382
		0.151024	0.0190076
		0.0188779	0.0570229
		0.0188779	0
		0.169901	0.0380153
		0.226535	0.0190076
		0.264291
		0.207657
		0.604094
		0.283169
		0.490826
		0.151024
		0.169901
		0.0566338
		0.132146
		0.0566338
		0.0188779
		0.132146
		0.245413
		0.434193
		0.132146
		0.0188779
		0.113268
		0.169901
		0.0755118
		0.0566338
		0
		0.169901
		0.169901
		0.0755118
		0.151024
		0.0377559
		0.113268
		0.0377559
		0.151024
		0.283169
		0
		0.113268
		0.188779
		0.226535
		0.283169
		0.245413
		0.434193
