# Supplementary material for: The decoy SNARE Tomosyn sets tonic versus phasic release properties and is required for homeostatic synaptic plasticity
Source: eLife journal article supplement (doi:10.7554/elife.72841), 2021-10-29
Supplement: supp [file elife-72841-supp-v1.zip › elife_poa_e72841_Figure_8_figure_supplement_1_source_data_1.xlsx]

## Sheet: Figure 8 Supplemental 1 B
Ctrl No Gyki	Ctrl Gyki	Tom No Gyki	Tom Gyki
0.933333	1.13333	5.56667	3.63333
2.4	0.9	4.56667	4.25																				Ctrl No Gyki	Ctrl Gyki	Tom No Gyki	Tom Gyki
1.73333	1.3	4.1	4.46667		Table Analyzed	Mini Freq						Number of families	1									Number of values	12	13	10	12
1.53333	2.13333	5.09677	4.02564		Data sets analyzed	A-D						Number of comparisons per family	6
1.66667	1.93333	5.36667	4.5									Alpha	0.05									Minimum	0.9333	0.7667	3.871	2.733
1.6	0.8125	3.87097	2.73333		ANOVA summary																	25% Percentile	1.55	0.8833	4.45	3.781
1.96667	1.5	5.23333	3.7		F	31.33						Tukey's multiple comparisons test	Mean Diff.	95.00% CI of diff.	Below threshold?	Summary	Adjusted P Value					Median	1.717	1.133	5.165	4.433
1	0.766667	6.4	4.4		P value	<0.0001						Ctrl No Gyki vs. Ctrl Gyki	0.5698	-0.8495 to 1.989	No	ns	0.7077	A-B				75% Percentile	2.325	1.767	5.775	7.549
1.7	0.866667	4.9	6.08696		P value summary	****						Ctrl No Gyki vs. Tom No Gyki	-3.37	-4.888 to -1.852	Yes	****	<0.0001	A-C				Maximum	3.433	2.133	7.433	9.533
2.1	1.09677	7.43333	9.2		Significant diff. among means (P < 0.05)?	Yes						Ctrl No Gyki vs. Tom Gyki	-3.497	-4.945 to -2.050	Yes	****	<0.0001	A-D
2.53333	1.83333		8.03571		R squared	0.6861						Ctrl Gyki vs. Tom No Gyki	-3.94	-5.431 to -2.449	Yes	****	<0.0001	B-C				Mean	1.883	1.314	5.253	5.38
3.43333	1.7		9.53333									Ctrl Gyki vs. Tom Gyki	-4.067	-5.486 to -2.648	Yes	****	<0.0001	B-D				Std. Deviation	0.6832	0.4616	1.056	2.295
	1.1				Brown-Forsythe test							Tom No Gyki vs. Tom Gyki	-0.127	-1.645 to 1.391	No	ns	0.996	C-D				Std. Error of Mean	0.1972	0.128	0.334	0.6626
					F (DFn, DFd)	3.405 (3, 43)
					P value	0.0259						Test details	Mean 1	Mean 2	Mean Diff.	SE of diff.	n1	n2	q	DF		Lower 95% CI	1.449	1.035	4.498	3.922
					P value summary	*						Ctrl No Gyki vs. Ctrl Gyki	1.883	1.314	0.5698	0.5311	12	13	1.517	43		Upper 95% CI	2.317	1.592	6.009	6.839
					Are SDs significantly different (P < 0.05)?	Yes						Ctrl No Gyki vs. Tom No Gyki	1.883	5.253	-3.37	0.5681	12	10	8.39	43
												Ctrl No Gyki vs. Tom Gyki	1.883	5.38	-3.497	0.5416	12	12	9.131	43
					Bartlett's test							Ctrl Gyki vs. Tom No Gyki	1.314	5.253	-3.94	0.558	13	10	9.985	43
					Bartlett's statistic (corrected)	30.78						Ctrl Gyki vs. Tom Gyki	1.314	5.38	-4.067	0.5311	13	12	10.83	43
					P value	<0.0001						Tom No Gyki vs. Tom Gyki	5.253	5.38	-0.127	0.5681	10	12	0.3161	43
					P value summary	****
					Are SDs significantly different (P < 0.05)?	Yes
					ANOVA table	SS	DF	MS	F (DFn, DFd)	P value
					Treatment (between columns)	165.4	3	55.14	F (3, 43) = 31.33	P<0.0001
					Residual (within columns)	75.69	43	1.76
					Total	241.1	46
					Data summary
					Number of treatments (columns)	4
					Number of values (total)	47

## Sheet: Figure 8 Supplemental 1 C
Ctrl No Gyki	Ctrl Gyki	Tom No Gyki	Tom Gyki	Ctrl(1.5)	Tom(1.5)
135.511	157.311	155.394	223.229	233.233	443.421
108.639	204.819	177.827	218.043	252.161	367.743																				Ctrl No Gyki	Ctrl Gyki	Tom No Gyki	Tom Gyki	Ctrl(1.5)	Tom(1.5)
167.738	261.998	143.75	251.965	280.922	338.671		Table Analyzed	1.5 mM ca EJC						Number of families	1									Number of values	12	13	10	12	11	11
108.004	176.921	283.72	204.781	308.995	389.064		Data sets analyzed	A-F						Number of comparisons per family	15
120.356	189.521	170.63	216.14	283.133	420.386									Alpha	0.05									Minimum	94.18	91.97	143.8	144.8	233.2	291.4
139.056	297.262	226.961	204.109	255.939	362.543		ANOVA summary																	25% Percentile	108.2	158.1	166.8	204.3	255.9	332.7
147.605	379.79	220.456	214.73	284.391	291.408		F	32.31						Tukey's multiple comparisons test	Mean Diff.	95.00% CI of diff.	Below threshold?	Summary	Adjusted P Value					Median	120.3	185.7	195.2	217.1	283.1	362.5
132.238	212.468	191.161	310.014	261.354	332.024		P value	<0.0001						Ctrl No Gyki vs. Ctrl Gyki	-77.76	-138.5 to -16.97	Yes	**	0.0048	A-B				75% Percentile	138.2	237.2	230.2	258.1	325.2	420.4
120.231	158.804	199.185	263.068	325.158	499.439		P value summary	****						Ctrl No Gyki vs. Tom No Gyki	-76.05	-141.1 to -11.04	Yes	*	0.0128	A-C				Maximum	167.7	379.8	283.7	310	396.6	499.4
94.1771	91.9682	240.071	144.794	372.433	332.705		Significant diff. among means (P < 0.05)?	Yes						Ctrl No Gyki vs. Tom Gyki	-99.29	-161.3 to -37.30	Yes	***	0.0002	A-D
106.428	140.325		178.77	396.596	357.259		R squared	0.7195						Ctrl No Gyki vs. Ctrl(1.5)	-171	-234.4 to -107.6	Yes	****	<0.0001	A-E				Mean	124.9	202.6	200.9	224.2	295.8	375.9
118.35	177.122		260.204											Ctrl No Gyki vs. Tom(1.5)	-251	-314.4 to -187.6	Yes	****	<0.0001	A-F				Std. Deviation	20.53	74.07	42.61	42.94	51.16	59.06
	185.748						Brown-Forsythe test							Ctrl Gyki vs. Tom No Gyki	1.704	-62.17 to 65.58	No	ns	>0.9999	B-C				Std. Error of Mean	5.927	20.54	13.47	12.4	15.43	17.81
							F (DFn, DFd)	1.215 (5, 63)						Ctrl Gyki vs. Tom Gyki	-21.53	-82.32 to 39.26	No	ns	0.9021	B-D
							P value	0.3126						Ctrl Gyki vs. Ctrl(1.5)	-93.23	-155.4 to -31.02	Yes	***	0.0006	B-E				Lower 95% CI	111.8	157.9	170.4	196.9	261.5	336.2
							P value summary	ns						Ctrl Gyki vs. Tom(1.5)	-173.3	-235.5 to -111.0	Yes	****	<0.0001	B-F				Upper 95% CI	137.9	247.4	231.4	251.4	330.2	415.6
							Are SDs significantly different (P < 0.05)?	No						Tom No Gyki vs. Tom Gyki	-23.24	-88.26 to 41.78	No	ns	0.8987	C-D
														Tom No Gyki vs. Ctrl(1.5)	-94.93	-161.3 to -28.58	Yes	**	0.0011	C-E
							Bartlett's test							Tom No Gyki vs. Tom(1.5)	-175	-241.3 to -108.6	Yes	****	<0.0001	C-F
							Bartlett's statistic (corrected)	16.11						Tom Gyki vs. Ctrl(1.5)	-71.69	-135.1 to -8.306	Yes	*	0.0177	D-E
							P value	0.0065						Tom Gyki vs. Tom(1.5)	-151.7	-215.1 to -88.34	Yes	****	<0.0001	D-F
							P value summary	**						Ctrl(1.5) vs. Tom(1.5)	-80.03	-144.8 to -15.28	Yes	**	0.0071	E-F
							Are SDs significantly different (P < 0.05)?	Yes
														Test details	Mean 1	Mean 2	Mean Diff.	SE of diff.	n1	n2	q	DF
							ANOVA table	SS	DF	MS	F (DFn, DFd)	P value		Ctrl No Gyki vs. Ctrl Gyki	124.9	202.6	-77.76	20.68	12	13	5.317	63
							Treatment (between columns)	431266	5	86253	F (5, 63) = 32.31	P<0.0001		Ctrl No Gyki vs. Tom No Gyki	124.9	200.9	-76.05	22.12	12	10	4.862	63
							Residual (within columns)	168156	63	2669				Ctrl No Gyki vs. Tom Gyki	124.9	224.2	-99.29	21.09	12	12	6.658	63
							Total	599422	68					Ctrl No Gyki vs. Ctrl(1.5)	124.9	295.8	-171	21.57	12	11	11.21	63
														Ctrl No Gyki vs. Tom(1.5)	124.9	375.9	-251	21.57	12	11	16.46	63
							Data summary							Ctrl Gyki vs. Tom No Gyki	202.6	200.9	1.704	21.73	13	10	0.1109	63
							Number of treatments (columns)	6						Ctrl Gyki vs. Tom Gyki	202.6	224.2	-21.53	20.68	13	12	1.472	63
							Number of values (total)	69						Ctrl Gyki vs. Ctrl(1.5)	202.6	295.8	-93.23	21.17	13	11	6.229	63
														Ctrl Gyki vs. Tom(1.5)	202.6	375.9	-173.3	21.17	13	11	11.58	63
														Tom No Gyki vs. Tom Gyki	200.9	224.2	-23.24	22.12	10	12	1.486	63
														Tom No Gyki vs. Ctrl(1.5)	200.9	295.8	-94.93	22.57	10	11	5.947	63
														Tom No Gyki vs. Tom(1.5)	200.9	375.9	-175	22.57	10	11	10.96	63
														Tom Gyki vs. Ctrl(1.5)	224.2	295.8	-71.69	21.57	12	11	4.701	63
														Tom Gyki vs. Tom(1.5)	224.2	375.9	-151.7	21.57	12	11	9.95	63
														Ctrl(1.5) vs. Tom(1.5)	295.8	375.9	-80.03	22.03	11	11	5.138	63

## Sheet: Figure 8 Supplemental 1 D
GCaMP 8 no gyki	GCaMP 8 gyki	GCaMP 7 no gyki	GCaMP 7 gyki
																							GCaMP 8 no gyki	GCaMP 8 gyki	GCaMP 7 no gyki	GCaMP 7 gyki
					Table Analyzed	GCaMP ∆F signals						Number of families	1									Number of values	14	14	8	8
					Data sets analyzed	A-D						Number of comparisons per family	6
												Alpha	0.05									Minimum	2683	1579	746.1	693.3
					ANOVA summary																	25% Percentile	3909	2793	1267	747.6
					F	19.85						Tukey's multiple comparisons test	Mean Diff.	95.00% CI of diff.	Below threshold?	Summary	Adjusted P Value					Median	5321	3647	2216	933.9
					P value	<0.0001						GCaMP 8 no gyki vs. GCaMP 8 gyki	1537	218.0 to 2856	Yes	*	0.0168	A-B				75% Percentile	6255	4482	3891	1096
8030.98	4275.55				P value summary	****						GCaMP 8 no gyki vs. GCaMP 7 no gyki	2815	1269 to 4362	Yes	****	<0.0001	A-C				Maximum	8031	5967	4444	2234
					Significant diff. among means (P < 0.05)?	Yes						GCaMP 8 no gyki vs. GCaMP 7 gyki	4209	2663 to 5756	Yes	****	<0.0001	A-D
					R squared	0.5982						GCaMP 8 gyki vs. GCaMP 7 no gyki	1278	-268.4 to 2825	No	ns	0.1365	B-C				Mean	5270	3733	2455	1061
												GCaMP 8 gyki vs. GCaMP 7 gyki	2672	1125 to 4219	Yes	***	0.0002	B-D				Std. Deviation	1555	1272	1395	497.4
					Brown-Forsythe test							GCaMP 7 no gyki vs. GCaMP 7 gyki	1394	-351.2 to 3139	No	ns	0.1578	C-D				Std. Error of Mean	415.6	340	493	175.9
6884.77	3938.3				F (DFn, DFd)	2.955 (3, 40)
		746.09	724.77		P value	0.0439						Test details	Mean 1	Mean 2	Mean Diff.	SE of diff.	n1	n2	q	DF		Lower 95% CI	4373	2999	1289	645.2
					P value summary	*						GCaMP 8 no gyki vs. GCaMP 8 gyki	5270	3733	1537	492.1	14	14	4.417	40		Upper 95% CI	6168	4468	3621	1477
					Are SDs significantly different (P < 0.05)?	Yes						GCaMP 8 no gyki vs. GCaMP 7 no gyki	5270	2455	2815	577.1	14	8	6.9	40
												GCaMP 8 no gyki vs. GCaMP 7 gyki	5270	1061	4209	577.1	14	8	10.32	40
					Bartlett's test							GCaMP 8 gyki vs. GCaMP 7 no gyki	3733	2455	1278	577.1	14	8	3.133	40
6045.07	4283.1				Bartlett's statistic (corrected)	8.128						GCaMP 8 gyki vs. GCaMP 7 gyki	3733	1061	2672	577.1	14	8	6.549	40
		1428.88	1014.24		P value	0.0434						GCaMP 7 no gyki vs. GCaMP 7 gyki	2455	1061	1394	651	8	8	3.028	40
					P value summary	*
					Are SDs significantly different (P < 0.05)?	Yes
5172.93	4337.4				ANOVA table	SS	DF	MS	F (DFn, DFd)	P value
					Treatment (between columns)	100967019	3	33655673	F (3, 40) = 19.85	P<0.0001
					Residual (within columns)	67816451	40	1695411
		1641.24	693.34		Total	168783470	43
					Data summary
5465.22	2693.35				Number of treatments (columns)	4
					Number of values (total)	44
		2790.71	816.14
5224.04	5713.01
		4444.22	2233.5
		4093.99	1036.16
7369.87	5966.72
		3280.17	1116.38
		1213.68	853.56
4001.3	2825.63
5936.42	3355.99
2683.1	3094.25
3631.73	3002.15
3165.59	1579.44
5418.69	2285.09
4755.3	4915.65
