# Supplementary material for: The decoy SNARE Tomosyn sets tonic versus phasic release properties and is required for homeostatic synaptic plasticity
Source: eLife journal article supplement (doi:10.7554/elife.72841), 2021-10-29
Supplement: supp [file elife-72841-supp-v1.zip › elife_poa_e72841_Figure_8_source_data_1.xlsx]

## Sheet: Figure 8 B
Ctrl No Gyki	Ctrl Gyki	Tom No Gyki	Tom Gyki
0.501848	0.315859	0.55581	0.297198
0.561347	0.359098	0.618991	0.299748																				Ctrl No Gyki	Ctrl Gyki	Tom No Gyki	Tom Gyki
0.435784	0.306337	0.606609	0.273056		Table Analyzed	Mini Peak						Number of families	1									Number of values	12	13	10	12
0.629235	0.313814	0.46371	0.314769		Data sets analyzed	A-D						Number of comparisons per family	6
0.478883	0.335584	0.559245	0.335267									Alpha	0.05									Minimum	0.4358	0.2392	0.4637	0.2731
0.514205	0.253066	0.479876	0.339288		ANOVA summary																	25% Percentile	0.4718	0.2873	0.4776	0.2978
0.518	0.290247	0.470933	0.294564		F	51.16						Tukey's multiple comparisons test	Mean Diff.	95.00% CI of diff.	Below threshold?	Summary	Adjusted P Value					Median	0.5161	0.3062	0.5318	0.3373
0.445514	0.296268	0.560643	0.342659		P value	<0.0001						Ctrl No Gyki vs. Ctrl Gyki	0.2284	0.1669 to 0.2898	Yes	****	<0.0001	A-B				75% Percentile	0.5988	0.3249	0.5721	0.3976
0.603962	0.333959	0.507793	0.38842		P value summary	****						Ctrl No Gyki vs. Tom No Gyki	-0.001024	-0.06674 to 0.06469	No	ns	>0.9999	A-C				Maximum	0.6292	0.3591	0.619	0.49
0.621081	0.287596	0.488835	0.490032		Significant diff. among means (P < 0.05)?	Yes						Ctrl No Gyki vs. Tom Gyki	0.1782	0.1155 to 0.2408	Yes	****	<0.0001	A-D
0.58338	0.306152		0.449157		R squared	0.7811						Ctrl Gyki vs. Tom No Gyki	-0.2294	-0.2939 to -0.1648	Yes	****	<0.0001	B-C				Mean	0.5302	0.3019	0.5312	0.3521
0.469408	0.28708		0.400636									Ctrl Gyki vs. Tom Gyki	-0.0502	-0.1116 to 0.01124	No	ns	0.1441	B-D				Std. Deviation	0.06804	0.03255	0.05658	0.06699
	0.2392				Brown-Forsythe test							Tom No Gyki vs. Tom Gyki	0.1792	0.1135 to 0.2449	Yes	****	<0.0001	C-D				Std. Error of Mean	0.01964	0.009029	0.01789	0.01934
					F (DFn, DFd)	2.240 (3, 43)
					P value	0.0973						Test details	Mean 1	Mean 2	Mean Diff.	SE of diff.	n1	n2	q	DF		Lower 95% CI	0.487	0.2822	0.4908	0.3095
					P value summary	ns						Ctrl No Gyki vs. Ctrl Gyki	0.5302	0.3019	0.2284	0.02299	12	13	14.05	43		Upper 95% CI	0.5735	0.3215	0.5717	0.3946
					Are SDs significantly different (P < 0.05)?	No						Ctrl No Gyki vs. Tom No Gyki	0.5302	0.5312	-0.001024	0.02459	12	10	0.05889	43
												Ctrl No Gyki vs. Tom Gyki	0.5302	0.3521	0.1782	0.02345	12	12	10.75	43
					Bartlett's test							Ctrl Gyki vs. Tom No Gyki	0.3019	0.5312	-0.2294	0.02416	13	10	13.43	43
					Bartlett's statistic (corrected)	6.519						Ctrl Gyki vs. Tom Gyki	0.3019	0.3521	-0.0502	0.02299	13	12	3.088	43
					P value	0.0889						Tom No Gyki vs. Tom Gyki	0.5312	0.3521	0.1792	0.02459	10	12	10.3	43
					P value summary	ns
					Are SDs significantly different (P < 0.05)?	No
					ANOVA table	SS	DF	MS	F (DFn, DFd)	P value
					Treatment (between columns)	0.5062	3	0.1687	F (3, 43) = 51.16	P<0.0001
					Residual (within columns)	0.1418	43	0.003298
					Total	0.648	46
					Data summary
					Number of treatments (columns)	4
					Number of values (total)	47

## Sheet: Figure 8 E
Ctrl No Gyki	Ctrl Gyki	Tom No Gyki	Tom Gyki
-68.006	-49.688	-86.3698	-66.3433
-60.9843	-73.5501	-110.073	-65.358																				Ctrl No Gyki	Ctrl Gyki	Tom No Gyki	Tom Gyki
-73.0975	-80.2597	-87.2003	-68.8005		Table Analyzed	EJC Peak						Number of families	1									Number of values	12	13	10	12
-67.9598	-55.5202	-131.564	-64.4588		Data sets analyzed	A-D						Number of comparisons per family	6
-57.6362	-63.6002	-95.4237	-72.4645									Alpha	0.05									Minimum	-76.46	-110.2	-131.6	-106.2
-71.5033	-75.227	-108.913	-69.2517		ANOVA summary																	25% Percentile	-72.34	-74.39	-111.9	-96.71
-76.4594	-110.233	-103.82	-63.2517		F	17.45						Tukey's multiple comparisons test	Mean Diff.	95.00% CI of diff.	Below threshold?	Summary	Adjusted P Value					Median	-65.02	-55.52	-105.5	-70.1
-58.9137	-62.9475	-107.173	-106.229		P value	<0.0001						Ctrl No Gyki vs. Ctrl Gyki	-4.603	-21.35 to 12.14	No	ns	0.8826	A-B				75% Percentile	-58.6	-47.06	-93.37	-65.6
-72.6152	-53.0341	-101.145	-102.181		P value summary	****						Ctrl No Gyki vs. Tom No Gyki	39.63	21.72 to 57.54	Yes	****	<0.0001	A-C				Maximum	-55.55	-26.45	-86.37	-63.25
-58.4916	-26.4497	-117.355	-70.9536		Significant diff. among means (P < 0.05)?	Yes						Ctrl No Gyki vs. Tom Gyki	12.54	-4.531 to 29.62	No	ns	0.2178	A-D
-62.0881	-42.9609		-80.296		R squared	0.549						Ctrl Gyki vs. Tom No Gyki	44.23	26.64 to 61.82	Yes	****	<0.0001	B-C				Mean	-65.28	-60.67	-104.9	-77.82
-55.5545	-50.8481		-104.247									Ctrl Gyki vs. Tom Gyki	17.15	0.4029 to 33.89	Yes	*	0.0429	B-D				Std. Deviation	7.145	20.98	13.65	16.55
	-44.431				Brown-Forsythe test							Tom No Gyki vs. Tom Gyki	-27.08	-44.99 to -9.175	Yes	**	0.0012	C-D				Std. Error of Mean	2.062	5.819	4.315	4.778
					F (DFn, DFd)	1.338 (3, 43)
					P value	0.2746						Test details	Mean 1	Mean 2	Mean Diff.	SE of diff.	n1	n2	q	DF		Lower 95% CI	-69.82	-73.35	-114.7	-88.34
					P value summary	ns						Ctrl No Gyki vs. Ctrl Gyki	-65.28	-60.67	-4.603	6.265	12	13	1.039	43		Upper 95% CI	-60.74	-47.99	-95.14	-67.3
					Are SDs significantly different (P < 0.05)?	No						Ctrl No Gyki vs. Tom No Gyki	-65.28	-104.9	39.63	6.701	12	10	8.363	43
												Ctrl No Gyki vs. Tom Gyki	-65.28	-77.82	12.54	6.389	12	12	2.776	43
					Bartlett's test							Ctrl Gyki vs. Tom No Gyki	-60.67	-104.9	44.23	6.583	13	10	9.502	43
					Bartlett's statistic (corrected)	11.02						Ctrl Gyki vs. Tom Gyki	-60.67	-77.82	17.15	6.265	13	12	3.87	43
					P value	0.0116						Tom No Gyki vs. Tom Gyki	-104.9	-77.82	-27.08	6.701	10	12	5.716	43
					P value summary	*
					Are SDs significantly different (P < 0.05)?	Yes
					ANOVA table	SS	DF	MS	F (DFn, DFd)	P value
					Treatment (between columns)	12822	3	4274	F (3, 43) = 17.45	P<0.0001
					Residual (within columns)	10533	43	244.9
					Total	23355	46
					Data summary
					Number of treatments (columns)	4
					Number of values (total)	47

## Sheet: Figure 8 F
Ctrl No Gyki	Ctrl Gyki	Tom No Gyki	Tom Gyki
135.511	157.311	155.394	223.229
108.639	204.819	177.827	218.043																				Ctrl No Gyki	Ctrl Gyki	Tom No Gyki	Tom Gyki
167.738	261.998	143.75	251.965		Table Analyzed	QC Peak						Number of families	1									Number of values	12	13	10	12
108.004	176.921	283.72	204.781		Data sets analyzed	A-D						Number of comparisons per family	6
120.356	189.521	170.63	216.14									Alpha	0.05									Minimum	94.18	91.97	143.8	144.8
139.056	297.262	226.961	204.109		ANOVA summary																	25% Percentile	108.2	158.1	166.8	204.3
147.605	379.79	220.456	214.73		F	9.097						Tukey's multiple comparisons test	Mean Diff.	95.00% CI of diff.	Below threshold?	Summary	Adjusted P Value					Median	120.3	185.7	195.2	217.1
132.238	212.468	191.161	310.014		P value	<0.0001						Ctrl No Gyki vs. Ctrl Gyki	-77.76	-131.2 to -24.37	Yes	**	0.0019	A-B				75% Percentile	138.2	237.2	230.2	258.1
120.231	158.804	199.185	263.068		P value summary	****						Ctrl No Gyki vs. Tom No Gyki	-76.05	-133.2 to -18.95	Yes	**	0.0049	A-C				Maximum	167.7	379.8	283.7	310
94.1771	91.9682	240.071	144.794		Significant diff. among means (P < 0.05)?	Yes						Ctrl No Gyki vs. Tom Gyki	-99.29	-153.7 to -44.84	Yes	****	<0.0001	A-D
106.428	140.325		178.77		R squared	0.3882						Ctrl Gyki vs. Tom No Gyki	1.704	-54.39 to 57.80	No	ns	0.9998	B-C				Mean	124.9	202.6	200.9	224.2
118.35	177.122		260.204									Ctrl Gyki vs. Tom Gyki	-21.53	-74.93 to 31.86	No	ns	0.7047	B-D				Std. Deviation	20.53	74.07	42.61	42.94
	185.748				Brown-Forsythe test							Tom No Gyki vs. Tom Gyki	-23.24	-80.34 to 33.87	No	ns	0.699	C-D				Std. Error of Mean	5.927	20.54	13.47	12.4
					F (DFn, DFd)	1.885 (3, 43)
					P value	0.1465						Test details	Mean 1	Mean 2	Mean Diff.	SE of diff.	n1	n2	q	DF		Lower 95% CI	111.8	157.9	170.4	196.9
					P value summary	ns						Ctrl No Gyki vs. Ctrl Gyki	124.9	202.6	-77.76	19.98	12	13	5.504	43		Upper 95% CI	137.9	247.4	231.4	251.4
					Are SDs significantly different (P < 0.05)?	No						Ctrl No Gyki vs. Tom No Gyki	124.9	200.9	-76.05	21.37	12	10	5.033	43
												Ctrl No Gyki vs. Tom Gyki	124.9	224.2	-99.29	20.37	12	12	6.892	43
					Bartlett's test							Ctrl Gyki vs. Tom No Gyki	202.6	200.9	1.704	20.99	13	10	0.1148	43
					Bartlett's statistic (corrected)	15.6						Ctrl Gyki vs. Tom Gyki	202.6	224.2	-21.53	19.98	13	12	1.524	43
					P value	0.0014						Tom No Gyki vs. Tom Gyki	200.9	224.2	-23.24	21.37	10	12	1.538	43
					P value summary	**
					Are SDs significantly different (P < 0.05)?	Yes
					ANOVA table	SS	DF	MS	F (DFn, DFd)	P value
					Treatment (between columns)	67970	3	22657	F (3, 43) = 9.097	P<0.0001
					Residual (within columns)	107100	43	2491
					Total	175069	46
					Data summary
					Number of treatments (columns)	4
					Number of values (total)	47

## Sheet: Figure 8 H
Ctrl 1b Before	Ctrl 1b After	Tom 1b Before	Tom 1b After
0.065073	0.204786
0.196527	0.316856																							Ctrl 1b Before	Ctrl 1b After	Tom 1b Before	Tom 1b After
0.176187	0.270433				Table Analyzed	Avg 1b							Number of families	1									Number of values	7	7	7	7
0.169028	0.244765												Number of comparisons per family	6									Number of missing values	7	7	7	7
0.050633	0.276151				Mixed-effects model (REML)	Matching: Across row							Alpha	0.05
0.189828	0.253752				Assume sphericity?	No																	Minimum	0.05063	0.1493	0.1382	0.1531
0.080503	0.149279				Alpha	0.05							Tukey's multiple comparisons test	Mean Diff.	95.00% CI of diff.	Below threshold?	Summary	Adjusted P Value					25% Percentile	0.06507	0.2048	0.1723	0.1799
		0.346779	0.368009										Ctrl 1b Before vs. Ctrl 1b After	-0.1126	-0.1873 to -0.03796	Yes	**	0.0079	A-B				Median	0.169	0.2538	0.2373	0.2395
		0.22738	0.202134		Fixed effect (type III)	P value	P value summary	Statistically significant (P < 0.05)?	F (DFn, DFd)	Geisser-Greenhouse's epsilon			Ctrl 1b Before vs. Tom 1b Before	-0.1052		No	ns	>0.9999	A-C				75% Percentile	0.1898	0.2762	0.273	0.3192
		0.13815	0.153139		Treatment (between columns)			No	F (, ) = 15.82				Ctrl 1b Before vs. Tom 1b After	-0.1113		No	ns	>0.9999	A-D				Maximum	0.1965	0.3169	0.3468	0.368
		0.237264	0.244884										Ctrl 1b After vs. Tom 1b Before	0.007429		No	ns	>0.9999	B-C
		0.17231	0.179892		Random effects	SD	Variance						Ctrl 1b After vs. Tom 1b After	0.001326		No	ns	>0.9999	B-D				Mean	0.1325	0.2451	0.2377	0.2438
		0.269115	0.239461		Individual (between rows)	0.05849	0.003421						Tom 1b Before vs. Tom 1b After	-0.006103	-0.04064 to 0.02844	No	ns	0.9247	C-D				Std. Deviation	0.06401	0.05422	0.06883	0.07657
		0.273022	0.319222		Residual	0.03143	0.000988																Std. Error of Mean	0.02419	0.02049	0.02602	0.02894
													Test details	Mean 1	Mean 2	Mean Diff.	SE of diff.	n1	n2	q	DF
					Was the matching effective?								Ctrl 1b Before vs. Ctrl 1b After	0.1325	0.2451	-0.1126	0.02156	7	7	7.385	6		Lower 95% CI	0.07334	0.195	0.1741	0.173
					Chi-square, df	22.32, 1							Ctrl 1b Before vs. Tom 1b Before	0.1325	0.2377	-0.1052	0	7	7	-infinity	-1		Upper 95% CI	0.1917	0.2953	0.3014	0.3146
					P value	<0.0001							Ctrl 1b Before vs. Tom 1b After	0.1325	0.2438	-0.1113	0	7	7	-infinity	-1
					P value summary	****							Ctrl 1b After vs. Tom 1b Before	0.2451	0.2377	0.007429	0	7	7	-infinity	-1
					Is there significant matching (P < 0.05)?	Yes							Ctrl 1b After vs. Tom 1b After	0.2451	0.2438	0.001326	0	7	7	-infinity	-1
													Tom 1b Before vs. Tom 1b After	0.2377	0.2438	-0.006103	0.009978	7	7	0.865	6
					Data summary
					Number of treatments (columns)	4
					Number of subjects (rows)	14
					Number of missing values	28

## Sheet: Figure 8 I
Ctrl 1b Before	Ctrl 1b After	Tom 1b Before	Tom 1b After
																							Ctrl 1b Before	Ctrl 1b After	Tom 1b Before	Tom 1b After
					Table Analyzed	All 1b						Number of families	1									Number of values	344	344	308	308
					Data sets analyzed	A-D						Number of comparisons per family	6
0.110624	0.395413	0.516506	0.700574									Alpha	0.05									Minimum	0	0	0	0
0.036875	0.327238	0.195916	0.410092		ANOVA summary																	25% Percentile	0.04041	0.1155	0.0922	0.09243
0.165936	0.368143	0.694612	0.478441		F	46.68						Tukey's multiple comparisons test	Mean Diff.	95.00% CI of diff.	Below threshold?	Summary	Adjusted P Value					Median	0.092	0.2051	0.2325	0.222
0.055312	0.218159	0.765854	0.854359		P value	<0.0001						Ctrl 1b Before vs. Ctrl 1b After	-0.1146	-0.1473 to -0.08181	Yes	****	<0.0001	A-B				75% Percentile	0.1658	0.3387	0.3687	0.3825
0.055312	0.436317	0.516506	0.820185		P value summary	****						Ctrl 1b Before vs. Tom 1b Before	-0.1239	-0.1576 to -0.09022	Yes	****	<0.0001	A-C				Maximum	0.6062	0.871	0.7659	0.8714
0	0.231794	0.427453	0.615138		Significant diff. among means (P < 0.05)?	Yes						Ctrl 1b Before vs. Tom 1b After	-0.1326	-0.1663 to -0.09890	Yes	****	<0.0001	A-D
0.036875	0.136349	0.160295	0.54679		R squared	0.09724						Ctrl 1b After vs. Tom 1b Before	-0.00936	-0.04307 to 0.02435	No	ns	0.8914	B-C				Mean	0.1275	0.2421	0.2515	0.2601
0.184374	0.177254	0.267158	0.410092									Ctrl 1b After vs. Tom 1b After	-0.01804	-0.05175 to 0.01566	No	ns	0.5141	B-D				Std. Deviation	0.1185	0.1699	0.1782	0.1961
0.036875	0.354508	0.106863	0.222133		Brown-Forsythe test							Tom 1b Before vs. Tom 1b After	-0.008681	-0.04331 to 0.02594	No	ns	0.9173	C-D				Std. Error of Mean	0.006387	0.00916	0.01016	0.01117
0	0.354508	0.160295	0.239221		F (DFn, DFd)	29.80 (3, 1300)
0	0	0.748044	0.700574		P value	<0.0001						Test details	Mean 1	Mean 2	Mean Diff.	SE of diff.	n1	n2	q	DF		Lower 95% CI	0.115	0.2241	0.2315	0.2382
0.036875	0.490857	0.64118	0.529703		P value summary	****						Ctrl 1b Before vs. Ctrl 1b After	0.1275	0.2421	-0.1146	0.01274	344	344	12.72	1300		Upper 95% CI	0.1401	0.2601	0.2714	0.2821
0.018437	0.05454	0.534317	0.478441		Are SDs significantly different (P < 0.05)?	Yes						Ctrl 1b Before vs. Tom 1b Before	0.1275	0.2515	-0.1239	0.0131	344	308	13.38	1300
0	0.190889	0.463075	0.529703									Ctrl 1b Before vs. Tom 1b After	0.1275	0.2601	-0.1326	0.0131	344	308	14.31	1300
0.018437	0.218159	0.409643	0.393005		Bartlett's test							Ctrl 1b After vs. Tom 1b Before	0.2421	0.2515	-0.00936	0.0131	344	308	1.01	1300
0.092187	0.08181	0.284969	0.427179		Bartlett's statistic (corrected)	85.64						Ctrl 1b After vs. Tom 1b After	0.2421	0.2601	-0.01804	0.0131	344	308	1.947	1300
0.110624	0.272698	0.427453	0.307569		P value	<0.0001						Tom 1b Before vs. Tom 1b After	0.2515	0.2601	-0.008681	0.01346	308	308	0.9121	1300
0.110624	0.340873	0.338401	0.239221		P value summary	****
0.055312	0.259063	0.534317	0.6664		Are SDs significantly different (P < 0.05)?	Yes
0.147499	0.313603	0.409643	0.273395
0.129062	0.204524	0.463075	0.598051		ANOVA table	SS	DF	MS	F (DFn, DFd)	P value
0.147499	0.368143	0.338401	0.307569		Treatment (between columns)	3.907	3	1.302	F (3, 1300) = 46.68	P<0.0001
0	0.08181	0.480885	0.358831		Residual (within columns)	36.27	1300	0.0279
0.055312	0.109079	0.071242	0.051262		Total	40.18	1303
0.129062	0.354508	0.391832	0.324656
0.092187	0.286333	0.231537	0.427179		Data summary
0.018437	0.095444	0.30278	0.478441		Number of treatments (columns)	4
0.018437	0	0.30278	0.136697		Number of values (total)	1304
0.092187	0.122714	0	0.034174
0.147499	0.163619	0.124674	0.085436
0	0.013635	0.427453	0.427179
0.092187	0.136349	0.356211	0.239221
0.073749	0.08181	0.516506	0.54679
0.055312	0.163619	0.30278	0.102523
0	0	0.249348	0.187959
0.018437	0.08181	0.231537	0.324656
0.073749	0.095444	0.587749	0.871446
0.073749	0.218159	0.569938	0.444267
0.258123	0.463587	0.391832	0.512615
0.110624	0.190889	0.089053	0.017087
0.018437	0.136349	0.017811	0.017087
0.036875	0.013635	0.534317	0.495528
0.092187	0.299968	0.338401	0.341744
0.092187	0.299968	0.534317	0.461354
0.036875	0.05454
0.055312	0.149984
0.073749	0.422683	0.110251	0.172064
0.018437	0.136349	0.110251	0.156422
0	0.245429	0.091876	0.250274
0	0.068175	0	0.046926
0.092187	0.272698	0.367505	0.062569
0.055312	0.095444	0.202128	0.078211
		0.367505	0.375412
0.165524	0.466946	0.147002	0.172064
0.091958	0.116736	0	0.688255
0.091958	0.10006	0.018375	0.250274
0.23909	0.250149	0.238878	0.328485
0.128741	0.133413	0.202128	0.109495
0.165524	0.266826	0.551257	0.500549
0.551747	0.416916	0.34913	0.015642
0.312657	0.483622	0.091876	0.172064
0.110349	0.133413	0.147002	0.688255
0.386223	0.450269	0.018375	0.078211
0.073566	0.016677	0.312379	0.062569
0.147132	0.416916	0.404255	0.125137
0.257482	0.283503	0.73501	0.250274
0.294265	0.633712	0.73501	0.125137
0.386223	0.717095	0.275629	0.625686
0.036783	0.250149	0.606383	0.782108
0.073566	0.283503	0.716634	0.547475
0.128741	0.20012	0.294004	0.312843
0.23909	0.617035	0.294004	0.031284
0.110349	0.300179	0.459381	0.203348
0.055175	0.15009	0.294004	0.015642
0.331048	0.400239	0.477756	0.281559
0.404614	0.567005	0.312379	0.109495
0	0.133413	0	0.078211
0.055175	0.316856
0.386223	0.600359
0.404614	0.300179	0.012971	0.05166
0.257482	0.567005	0	0.03444
0.073566	0.016677	0.012971	0.086099
0.183916	0.350209	0.181599	0.01722
0.275873	0.266826	0.064857	0.086099
0.220699	0.300179	0.090799	0.189419
0.073566	0.15009	0.220513	0.292738
0.147132	0.316856	0.038914	0.06888
0.018392	0.116736	0.324284	0.361617
		0.259427	0.086099
0.307005	0.612309	0.090799	0.01722
0.487596	0.513015	0.505882	0.516596
0.307005	0.182038	0.103771	0.06888
0.090296	0.463369	0.233484	0.103319
0.397301	0.661955	0.129713	0.172199
0.21671	0.215135	0	0.137759
0.343123	0.479918	0.077828	0.01722
0.288946	0.413722	0.025943	0.05166
0.379242	0.29788	0.064857	0.05166
0.325064	0.29788	0.077828	0.292738
0.108355	0.165489	0.090799	0.120539
0.162532	0.198587	0.103771	0.413277
0.19865	0.281331	0.233484	0.309958
0.433419	0.59576	0.350226	0.05166
0.054177	0.264782	0.064857	0.516596
0.307005	0.579211	0.142685	0.258298
0.144473	0.198587	0.19457	0.172199
0.054177	0.049647	0.142685	0.327178
0.252828	0.347527	0.220513	0.103319
0.090296	0.132391	0.19457	0.01722
0.054177	0.049647	0.038914	0.241078
0.036118	0.066196	0.012971	0.03444
0.108355	0.231684	0.19457	0.086099
0.108355	0.380624	0.077828	0
0	0.165489	0.038914	0.120539
0.054177	0.033098	0	0.120539
0.433419	0.413722	0.129713	0.01722
0.054177	0.066196	0.116742	0.05166
0.288946	0.413722	0	0.01722
0.21671	0.463369
0.090296	0.231684
0.270887	0.281331
0.072237	0.132391	0.071891	0.054638
0.036118	0.14894	0.143783	0.127488
0.144473	0.281331	0.071891	0.236764
0.018059	0.215135	0.035946	0.036425
0.072237	0.231684	0.179728	0.218551
0.072237	0.016549	0.323511	0.218551
0	0.066196	0.233647	0.291402
0.072237	0.115842	0.431348	0.200339
0.072237	0.132391	0.179728	0.127488
		0.233647	0.309615
		0.449321	0.200339
0.294845	0.292177	0.053918	0.018213
0.073711	0.171869	0.035946	0
0.128995	0.137495	0.431348	0.291402
0.442268	0.481232	0.071891	0.07285
0.276418	0.103121	0.107837	0.07285
0.239562	0.412485	0.485266	0.309615
0.184278	0.085934	0.323511	0.364252
0.350129	0.154682	0.377429	0.291402
0.239562	0.412485	0.305538	0.236764
0.497552	0.567167	0.287565	0.34604
0.092139	0.154682	0.521212	0.382465
0.073711	0.051561	0.089864	0.091063
0.294845	0.481232	0.12581	0.182126
0.128995	0.206242	0.395402	0.291402
0	0.034374	0.305538	0.437103
0.073711	0.137495	0.377429	0.364252
0.110567	0.120308	0.215674	0.218551
0.239562	0.498419	0.179728	0.273189
0.036856	0.120308	0.269592	0.254977
0.128995	0.137495	0.467294	0.546379
0.350129	0.464046	0.12581	0.200339
0.073711	0.017187	0.233647	0.200339
0.25799	0.395298	0.197701	0.34604
0.092139	0.154682
0.092139	0.137495
0	0.068747	0.110696	0.219718
0.276418	0.309364	0.313638	0.384507
0.110567	0.223429	0.461233	0.585915
0.25799	0.498419	0.553479	0.677465
0.221134	0.154682	0.25829	0.183099
0.25799	0.395298	0.368986	0.384507
0.313273	0.257803	0.25829	0.274648
0.128995	0.154682	0.018449	0.01831
0.110567	0.171869	0.055348	0.073239
0.110567	0.154682	0.129145	0.274648
0.110567	0.189056	0.055348	0.05493
0.239562	0.360924	0.110696	0.109859
0.110567	0.034374	0.018449	0.109859
0.294845	0.27499	0.184493	0.164789
0.165851	0.257803	0.295189	0.402817
0.331701	0.498419	0.332088	0.512676
0	0.051561	0.387436	0.238028
0.073711	0.137495	0.553479	0.476056
0.110567	0.429672	0.055348	0.128169
0.110567	0.085934	0.166044	0.091549
0.055284	0.154682	0.368986	0.292958
0.294845	0.739036	0.166044	0.292958
0.073711	0.309364	0.424334	0.347887
0.147423	0.171869	0	0.03662
0.128995	0.704662	0.073797	0
0.073711	0.171869	0.018449	0.073239
0.184278	0.240616	0.018449	0.03662
0.147423	0.206242	0.092247	0.128169
0.036856	0.137495	0.166044	0.128169
0.110567	0.27499	0.036899	0.03662
0.110567	0.171869	0.129145	0.128169
0.221134	0.137495	0.110696	0.01831
0.110567	0.137495	0.036899	0.01831
0.055284	0.137495	0.055348	0.091549
		0.110696	0.05493
0.053884	0.596797	0.27674	0.347887
0.013471	0.306463	0.221392	0.091549
0.040413	0.338723	0.166044	0.219718
0.026942	0.48389	0.036899	0
0.053884	0.532278	0.553479	0.604225
0.040413	0.258074	0.055348	0.183099
0	0.241945	0.036899	0.03662
0.080827	0.145167	0.036899	0.05493
0.026942	0.322593	0.092247	0.01831
0.094298	0.290334	0.036899	0.01831
0	0.871001	0.055348	0.05493
0.053884	0.258074	0.018449	0.05493
0.080827	0.338723
0.080827	0.290334
0.134711	0.241945	0.07375	0.086926
0.053884	0.403241	0.294999	0.121696
0.040413	0.209685	0.165937	0.052155
0.013471	0.112908	0.07375	0.104311
0.026942	0.209685	0.589998	0.312933
0.067355	0.129037	0.147499	0.156466
0.053884	0.112908	0.331874	0.139081
0.094298	0.46776	0.055312	0.121696
0.080827	0.112908	0.036875	0.086926
0.026942	0.209685	0.147499	0.104311
0.040413	0.048389	0.055312	0.069541
0.026942	0.112908	0.055312	0.03477
0.080827	0.129037	0.258124	0.052155
0.053884	0.629056	0.165937	0.104311
0.040413	0.435501	0.57156	0.330318
0.053884	0.258074	0.221249	0.312933
0.013471	0.161297	0.479373	0.208622
0.040413	0.258074	0.424061	0.330318
0	0.145167	0.460936	0.382473
0	0.145167	0.258124	0.226007
0.067355	0.500019	0.405624	0.330318
0.107769	0.306463	0.442498	0.538939
0.040413	0.112908	0.368749	0.417243
0.053884	0.241945	0.07375	0.191237
0.013471	0.112908	0.092187	0.052155
0.013471	0.048389	0.276561	0.434629
0.026942	0.161297	0.368749	0.208622
0.013471	0.290334	0.313436	0.104311
0.013471	0.129037	0.165937	0.365088
0	0.387112	0.092187	0.382473
0.134711	0.048389	0.294999	0.226007
0.053884	0.322593	0.07375	0.156466
0.107769	0.435501	0.110625	0.365088
0.040413	0.048389	0.294999	0.017385
0.040413	0.209685	0.147499	0.226007
0.067355	0.209685	0.350311	0.243392
0.215537	0.500019	0.589998	0.504169
0.013471	0.096778	0.460936	0.382473
0	0.290334	0.424061	0.208622
0.013471	0.193556	0.184374	0.173851
0.013471	0.161297	0.313436	0.173851
0.053884	0.080648	0.516248	0.712791
0.067355	0.500019	0.018437	0.104311
0.175124	0.822612	0.424061	0.173851
		0.239687	0.156466
		0.165937	0.121696
0.183705	0.017324
0.091852	0
0.165334	0.086622	0.496532	0.258791
0.073482	0.034649	0.367801	0.425156
0.055111	0.173244	0.367801	0.443641
0.202075	0.017324	0.147121	0.536066
0.312298	0.381137	0.202291	0.480611
0.036741	0.034649	0.12873	0.610006
0.146964	0.034649	0.606872	0.499096
0.036741	0.051973	0.386191	0.166365
0.055111	0	0.239071	0.554551
0.275557	0.086622	0.533312	0.720917
0	0.15592	0.03678	0.092425
0.165334	0.051973	0.275851	0.295761
0.01837	0.017324	0.220681	0.14788
0.238816	0.398462	0.239071	0.055455
0.349039	0.537057	0.275851	0.07394
0.183705	0.31184	0.09195	0.221821
0.312298	0.519733	0.275851	0.092425
0.073482	0.346489	0.294241	0.129395
0.110223	0.31184	0.349411	0.14788
0.275557	0.277191	0.349411	0.462126
0.01837	0.086622	0.349411	0.18485
0.146964	0.103947	0.11034	0.369701
0.257187	0.363813	0.11034	0.277276
0.146964	0.121271	0.312631	0.683947
0.238816	0.15592	0.331021	0.295761
0.606225	0.190569	0.257461	0.406671
0.055111	0.606355	0.606872	0.295761
0.01837	0.15592	0.367801	0.480611
0.091852	0.502408	0.183901	0.240306
0.312298	0.329164	0.570092	0.665462
0.055111	0.363813	0.05517	0.203335
0.055111	0.121271	0.183901	0.443641
0.146964	0.537057	0.478142	0.554551
0.110223	0.207893	0.331021	0.665462
0.496003	0.31184	0.01839	0.07394
0.165334	0.589031	0.147121	0.03697
0.477632	0.415786	0.09195	0.18485
0.238816	0.190569	0.459752	0.258791
0.38578	0.433111	0.220681	0.240306
0.551114	0.502408	0.386191	0.18485
0.01837	0.121271	0.12873	0.536066
0.202075	0.31184	0.386191	0.258791
0.349039	0.641004	0.165511	0.277276
0.440891	0.589031	0.202291	0.443641
0.128593	0.051973	0.312631	0.240306
0.110223	0.103947	0.09195	0.443641
0.238816	0.589031	0.12873	0.055455
0.257187	0.381137	0.09195	0.258791
0	0.017324	0.183901	0.07394
		0.643652	0.425156
		0.239071	0.332731
0.128805	0.166637	0.165511	0.092425
0.092004	0.179455	0.257461	0.240306
0.128805	0.192273	0.220681	0.14788
0.092004	0.230728	0.386191	0.166365
0.055202	0.064091	0.257461	0.221821
0.110404	0.115364	0.533312	0.332731
0.110404	0.307637	0.01839	0.406671
0.110404	0.025636	0.07356	0.757887
0.073603	0.21791	0.331021	0.554551
0.036801	0.115364	0.202291	0.536066
0.165606	0.243546	0.331021	0.203335
0.128805	0.307637	0.496532	0.462126
0.165606	0.282001	0.349411	0.813342
0.055202	0.076909	0.404581	0.221821
0.110404	0.089727	0.294241	0.277276
0.092004	0.012818	0.349411	0.314246
0.092004	0.307637
0	0.115364
0.147206	0.21791
0.018401	0.051273
0.018401	0.102546
0.073603	0.166637
0.055202	0.153819
0.110404	0.256364
0.036801	0.076909
0.018401	0.051273
0.110404	0.269182
0.147206	0.230728
0.276011	0.371728
0.018401	0.128182
0.036801	0.102546
0.055202	0.038455
0.055202	0.064091
0.147206	0.192273
0.036801	0.038455
0.036801	0.076909
0.110404	0.141
0.055202	0.102546
0.018401	0.205091
0.055202	0.064091
0.073603	0.141
0	0.051273
0.055202	0.141
0.092004	0.128182
0.036801	0.076909
0.128805	0.205091
0.073603	0.192273
0.018401	0.076909

## Sheet: Figure 8 K
Ctrl 1s Before	Ctrl 1s After	Tom 1s Before	Tom 1s After
0.111742	0.131804
0.101405	0.142111																							Ctrl 1s Before	Ctrl 1s After	Tom 1s Before	Tom 1s After
0.218835	0.227215				Table Analyzed	Avg 1s							Number of families	1									Number of values	7	7	7	7
0.191723	0.172219												Number of comparisons per family	6									Number of missing values	7	7	7	7
0.059463	0.0826				Mixed-effects model (REML)	Matching: Across row							Alpha	0.05
0.354395	0.309334				Assume sphericity?	No																	Minimum	0.05946	0.0826	0.1067	0.101
0.206392	0.156791				Alpha	0.05							Tukey's multiple comparisons test	Mean Diff.	95.00% CI of diff.	Below threshold?	Summary	Adjusted P Value					25% Percentile	0.1014	0.1318	0.1086	0.1263
		0.291532	0.235951										Ctrl 1s Before vs. Ctrl 1s After	0.003126	-0.04303 to 0.04929	No	ns	0.995	A-B				Median	0.1917	0.1568	0.174	0.1662
		0.158887	0.166182		Fixed effect (type III)	P value	P value summary	Statistically significant (P < 0.05)?	F (DFn, DFd)	Geisser-Greenhouse's epsilon			Ctrl 1s Before vs. Tom 1s Before	-0.008226		No	ns	>0.9999	A-C				75% Percentile	0.2188	0.2272	0.2417	0.236
		0.108554	0.101044		Treatment (between columns)			No	F (, ) = 0.04018				Ctrl 1s Before vs. Tom 1s After	-0.006573		No	ns	>0.9999	A-D				Maximum	0.3544	0.3093	0.2915	0.2878
		0.106669	0.126327										Ctrl 1s After vs. Tom 1s Before	-0.01135		No	ns	>0.9999	B-C
		0.174013	0.139781		Random effects	SD	Variance						Ctrl 1s After vs. Tom 1s After	-0.009699		No	ns	>0.9999	B-D				Mean	0.1777	0.1746	0.1859	0.1843
		0.241739	0.287818		Individual (between rows)	0.07447	0.005546						Tom 1s Before vs. Tom 1s After	0.001652	-0.04311 to 0.04642	No	ns	0.9992	C-D				Std. Deviation	0.09839	0.07371	0.06902	0.06873
		0.220141	0.232865		Residual	0.02457	0.0006038																Std. Error of Mean	0.03719	0.02786	0.02609	0.02598
													Test details	Mean 1	Mean 2	Mean Diff.	SE of diff.	n1	n2	q	DF
					Was the matching effective?								Ctrl 1s Before vs. Ctrl 1s After	0.1777	0.1746	0.003126	0.01333	7	7	0.3315	6		Lower 95% CI	0.08671	0.1064	0.1221	0.1207
					Chi-square, df	109.1, 1							Ctrl 1s Before vs. Tom 1s Before	0.1777	0.1859	-0.008226	0	7	7	-infinity	-1		Upper 95% CI	0.2687	0.2427	0.2498	0.2478
					P value	<0.0001							Ctrl 1s Before vs. Tom 1s After	0.1777	0.1843	-0.006573	0	7	7	-infinity	-1
					P value summary	****							Ctrl 1s After vs. Tom 1s Before	0.1746	0.1859	-0.01135	0	7	7	-infinity	-1
					Is there significant matching (P < 0.05)?	Yes							Ctrl 1s After vs. Tom 1s After	0.1746	0.1843	-0.009699	0	7	7	-infinity	-1
													Tom 1s Before vs. Tom 1s After	0.1859	0.1843	0.001652	0.01293	7	7	0.1807	6
					Data summary
					Number of treatments (columns)	4
					Number of subjects (rows)	14
					Number of missing values	28

## Sheet: Figure 8 L
Ctrl 1s Before	Ctrl 1s After	Tom 1s Before	Tom 1s After
																							Ctrl 1s Before	Ctrl 1s After	Tom 1s Before	Tom 1s After
					Table Analyzed	All 1s						Number of families	1									Number of values	205	205	224	224
					Data sets analyzed	A-D						Number of comparisons per family	6
0.018437	0.013635	0.128617	0.110602									Alpha	0.05									Minimum	0	0	0	0
0.129062	0.095444	0.385851	0.165903		ANOVA summary																	25% Percentile	0.0553	0.06237	0.07783	0.08693
0.110624	0.136349	0.275608	0.387107		F	0.158						Tukey's multiple comparisons test	Mean Diff.	95.00% CI of diff.	Below threshold?	Summary	Adjusted P Value					Median	0.1291	0.1382	0.1605	0.1454
0.055312	0.109079	0.23886	0.202771		P value	0.9246						Ctrl 1s Before vs. Ctrl 1s After	0.00646	-0.02967 to 0.04259	No	ns	0.9676	A-B				75% Percentile	0.2743	0.2575	0.2659	0.2601
0.27656	0.231794	0.404225	0.221204		P value summary	ns						Ctrl 1s Before vs. Tom 1s Before	-0.002761	-0.03812 to 0.03260	No	ns	0.9971	A-C				Maximum	0.7086	0.758	0.7166	0.7373
0.147499	0.040905	0.23886	0.018434		Significant diff. among means (P < 0.05)?	No						Ctrl 1s Before vs. Tom 1s After	0.000365	-0.03499 to 0.03572	No	ns	>0.9999	A-D
0.184374	0.136349	0.33073	0		R squared	0.0005546						Ctrl 1s After vs. Tom 1s Before	-0.009221	-0.04458 to 0.02614	No	ns	0.9079	B-C				Mean	0.1817	0.1752	0.1844	0.1813
0.018437	0	0.275608	0.387107									Ctrl 1s After vs. Tom 1s After	-0.006095	-0.04145 to 0.02926	No	ns	0.9708	B-D				Std. Deviation	0.1566	0.1404	0.1416	0.1296
0.018437	0.02727	0.128617	0.221204		Brown-Forsythe test							Tom 1s Before vs. Tom 1s After	0.003126	-0.03144 to 0.03769	No	ns	0.9956	C-D				Std. Error of Mean	0.01094	0.009807	0.009462	0.008662
0.055312	0.109079	0.165365	0.055301		F (DFn, DFd)	1.553 (3, 854)
0.036875	0.136349	0.404225	0.331806		P value	0.1992						Test details	Mean 1	Mean 2	Mean Diff.	SE of diff.	n1	n2	q	DF		Lower 95% CI	0.1601	0.1559	0.1658	0.1643
0.092187	0.204524	0.440973	0.202771		P value summary	ns						Ctrl 1s Before vs. Ctrl 1s After	0.1817	0.1752	0.00646	0.01404	205	205	0.6509	854		Upper 95% CI	0.2033	0.1946	0.2031	0.1984
0.294998	0.313603	0.146991	0.294939		Are SDs significantly different (P < 0.05)?	No						Ctrl 1s Before vs. Tom 1s Before	0.1817	0.1844	-0.002761	0.01374	205	224	0.2843	854
0.129062	0.299968	0.220487	0.294939									Ctrl 1s Before vs. Tom 1s After	0.1817	0.1813	0.000365	0.01374	205	224	0.03758	854
0.073749	0.136349	0.055122	0.221204		Bartlett's test							Ctrl 1s After vs. Tom 1s Before	0.1752	0.1844	-0.009221	0.01374	205	224	0.9494	854
0.055312	0.122714	0.110243	0.036867		Bartlett's statistic (corrected)	7.71						Ctrl 1s After vs. Tom 1s After	0.1752	0.1813	-0.006095	0.01374	205	224	0.6276	854
0.221248	0.272698	0.56959	0.294939		P value	0.0524						Tom 1s Before vs. Tom 1s After	0.1844	0.1813	0.003126	0.01343	224	224	0.3292	854
0.036875	0.040905	0.716581	0.737347		P value summary	ns
0.018437	0.02727	0.220487	0.184337		Are SDs significantly different (P < 0.05)?	No
0.147499	0.231794	0.404225	0.202771
0.073749	0.08181	0.257234	0.018434		ANOVA table	SS	DF	MS	F (DFn, DFd)	P value
0.055312	0.040905	0.385851	0.368674		Treatment (between columns)	0.00957	3	0.00319	F (3, 854) = 0.1580	P=0.9246
0.092187	0.05454	0.202113	0.442408		Residual (within columns)	17.25	854	0.02019
0.202811	0.040905	0.073496	0.165903		Total	17.26	857
0.258123	0.354508	0.293982	0.258072
0.165936	0.177254	0.56959	0.313373		Data summary
0.202811	0.231794	0.165365	0.202771		Number of treatments (columns)	4
0.184374	0.272698	0.073496	0.110602		Number of values (total)	858
0.018437	0.05454	0.385851	0.405541
0.092187	0.136349	0.477721	0.221204
0.073749	0.068175
0.092187	0.08181
0.055312	0.068175
0.129062	0.116179
0.110624	0.116179	0.055312	0.086926
0.092187	0.165969	0.092187	0.052155
0.258123	0.182566	0.387186	0.260777
0.092187	0.348536	0.092187	0.121696
0.092187	0.182566	0.092187	0.03477
0.092187	0.149372	0	0.086926
0.129062	0.066388	0.092187	0.139081
0.018437	0.132775	0.129062	0.121696
0.055312	0.082985	0.165937	0.173851
0.202811	0.199163	0.129062	0.156466
0.018437	0.033194	0.221249	0.295547
0.147499	0.21576	0.129062	0.052155
0.092187	0.082985	0.147499	0.243392
0.055312	0.165969	0.147499	0.069541
0.036875	0.033194	0.184374	0.086926
		0.258124	0.208622
		0.018437	0.03477
0.089225	0.049058	0.350311	0.260777
0.160604	0.163526	0.221249	0.03477
0.089225	0.196231	0.350311	0.365088
0.214139	0.261641	0.036875	0.347703
0.107069	0.261641	0	0.086926
0.160604	0.228936	0.036875	0.069541
0.178449	0.016353	0.036875	0.208622
0.107069	0.245289	0.147499	0.330318
0.053535	0.147173	0.331874	0.121696
0.089225	0.049058	0.184374	0.139081
0.196294	0.032705	0.036875	0.243392
0.178449	0.049058	0.239687	0.104311
0.196294	0.294346	0.221249	0.017385
0.285518	0.294346	0.258124	0.417243
0.267674	0.359757	0.368749	0.208622
0.321208	0.277994	0.055312	0.243392
0.249829	0.212583	0.184374	0.226007
0.678106	0.555987
0.535347	0.621398
		0.055301	0.018434
0.018401	0.09979	0.110602	0.147469
0.147206	0.174633	0	0.258072
0.349613	0.212055	0.147469	0.184337
0.220808	0.349266	0	0
0.092004	0.062369	0.387107	0.092168
0.073603	0.062369	0.036867	0.018434
0.147206	0.087317	0	0.110602
0.239209	0.137212	0.110602	0.258072
0.128805	0.174633	0.073735	0.110602
0.110404	0.087317	0	0.018434
0.036801	0.037421	0.165903	0.036867
0.368014	0.249476	0.055301	0.036867
0.202408	0.224528	0.092168	0.092168
0.128805	0.024948	0	0.055301
0.128805	0.062369	0.368674	0.092168
0.441617	0.09979	0.110602	0
0.331213	0.311845	0.036867	0.129036
0.184007	0.212055	0.129036	0.110602
0.294411	0.199581	0.073735	0.036867
0.128805	0.237002	0.092168	0.129036
0.184007	0.224528	0.202771	0.055301
0.294411	0.212055	0.221204	0.110602
0.368014	0.299371	0.018434	0.036867
0.073603	0.224528	0.092168	0.368674
0.25761	0.212055	0.313373	0.092168
0.055202	0.062369	0.036867	0.129036
0.036801	0.149686
0.294411	0.274423
0.202408	0.274423
0.128805	0.162159	0.10721	0.145362
0.276011	0.137212	0.196552	0.072681
		0.21442	0.345235
		0.053605	0.072681
		0.10721	0.072681
		0.017868	0.090851
		0.071473	0
0.258535	0.29031	0	0.072681
0.051707	0.055297	0.196552	0.127192
0.034471	0.138243	0.268025	0.308895
0.086178	0.041473	0.053605	0.254384
0.068943	0.152067	0	0.072681
0.137885	0.069121	0	0.090851
0.051707	0.041473	0.178683	0.01817
0.12065	0.138243	0.21442	0.109022
0.034471	0.055297	0.017868	0.054511
0.034471	0.027649	0.285893	0.163532
0.034471	0.055297	0	0.254384
0.051707	0.110594	0.053605	0.199873
0	0	0	0.127192
0.137885	0.138243	0	0
0.017236	0.041473	0	0.036341
0.017236	0.138243	0.10721	0.109022
0	0.055297	0.017868	0.127192
0.017236	0.055297	0.035737	0.145362
0.034471	0	0	0.090851
0.051707	0.069121	0.303762	0.218043
0.051707	0.152067	0.178683	0.199873
0.034471	0.013824	0.125078	0.163532
0.086178	0.124419	0.089342	0.145362
0.086178	0.124419	0.357367	0.054511
0.034471	0.013824	0.089342	0.01817
0.034471	0.013824	0.178683	0.01817
0.051707	0.013824
0.051707	0.082946
0.034471	0.152067
0.137885	0.110594
0.034471	0.055297	0.054201	0.144536
0.034471	0.041473	0.144536	0.325205
0.017236	0.013824	0.216804	0.198737
0	0	0.198737	0.072268
0.017236	0.027649	0.108402	0.198737
0.017236	0.082946	0.036134	0.018067
0	0.082946	0.271004	0.271004
0.258535	0.055297	0.307138	0.144536
0.086178	0.276486	0.126469	0.252937
0.068943	0.19354	0.23487	0.126469
		0.361339	0.198737
		0.108402	0.162603
		0.252937	0.054201
0.272554	0.341078	0.469741	0.072268
0.290724	0.088428	0.144536	0.072268
0.635959	0.30318	0.216804	0.108402
0.417916	0.442138	0.216804	0.144536
0.218043	0.037898	0.090335	0.090335
0.6723	0.290548	0.036134	0.090335
0.363405	0.467403	0.090335	0.18067
0.381576	0.45477	0.289071	0.090335
0.199873	0.530565	0.072268	0.108402
0.399746	0.581095	0.23487	0.126469
0.072681	0.15159	0.23487	0.18067
0.127192	0.30318	0.23487	0.379406
0.290724	0.25265	0.054201	0.054201
0.436086	0.543198	0.289071	0.090335
0.272554	0.480035	0.090335	0.271004
0.436086	0.265283	0.054201	0.090335
0.545108	0.492668	0.090335	0.072268
0.308895	0	0.216804	0.144536
0.090851	0.189488	0.090335	0
0.199873	0.138958	0.23487	0.18067
0.617789	0.492668	0.126469	0.18067
0.199873	0.189488	0.090335	0.054201
0.399746	0.35371	0.144536	0.090335
0.236213	0.10106	0.126469	0.108402
0.526938	0.568463	0.252937	0.162603
0.381576	0.240018
0.545108	0.265283
0.454257	0.40424
0.417916	0.341078
0.490597	0.35371
0.417916	0.429505
0.70864	0.757951
0.399746	0.10106
0.181703	0.088428
0.399746	0.265283
0.254384	0.328445
0.202706	0.120168	0.012971	0.172199
0	0	0.064857	0.154979
0.055284	0.068667	0	0.103319
0.018428	0.017167	0.090799	0.447717
0.092139	0.034334	0.116742	0.464937
0.073711	0.240336	0.518854	0.344398
0.018428	0.051501	0.544796	0.223858
0.018428	0	0.505882	0.585476
0.128995	0.120168	0.090799	0.292738
0.42384	0.137335	0.103771	0.154979
0.147423	0.223169	0.376169	0.292738
0.110567	0.017167	0.415083	0.275518
0.239562	0.171669	0.168627	0.206639
0.184278	0.257503	0.181599	0.172199
0.055284	0.120168	0.337255	0.378837
0.073711	0.034334	0.363198	0.413277
0.368557	0.206002	0.19457	0.344398
0.350129	0.343337	0.103771	0.327178
0.036856	0.206002	0	0.292738
0.276418	0.154502	0.025943	0.223858
0.42384	0.360504	0.142685	0.172199
0.405412	0.085834	0.337255	0.06888
0.368557	0.017167	0.233484	0.223858
0.42384	0.206002	0.453997	0.413277
0.331701	0.27467	0.155656	0.120539
0.018428	0.085834	0.19457	0.120539
0.202706	0.257503	0.259427	0.206639
0.368557	0.32617	0.337255	0.344398
0.294845	0.206002	0.47994	0.447717
0.479124	0.360504	0.298341	0.172199
		0.077828	0.05166
		0.67451	0.361617
		0.116742	0.327178
		0.220513	0.137759
		0.38914	0.344398
		0.19457	0.120539
		0.103771	0.206639
		0.077828	0.327178
		0.19457	0.396057
		0.103771	0.309958
		0.272398	0.120539
		0.207541	0.103319
		0.324284	0.292738
		0.298341	0.344398
		0.037593	0.102699
		0.28195	0.445031
		0.16917	0.290982
		0.206763	0.102699
		0.187967	0.136933
		0.018797	0.085583
		0.093983	0.05135
		0.150373	0.119816
		0.244357	0.410798
		0.33834	0.273865
		0.375933	0.410798
		0.413527	0.496381
		0.206763	0.05135
		0.39473	0.085583
		0.187967	0.119816
		0.11278	0.496381
		0.319543	0.513497
		0	0.068466
