# Supplementary figures and images for: The decoy SNARE Tomosyn sets tonic versus phasic release properties and is required for homeostatic synaptic plasticity
Source: eLife journal article supplement (doi:10.7554/elife.72841), 2021-10-29

Figure 2 - supplemental figure 1

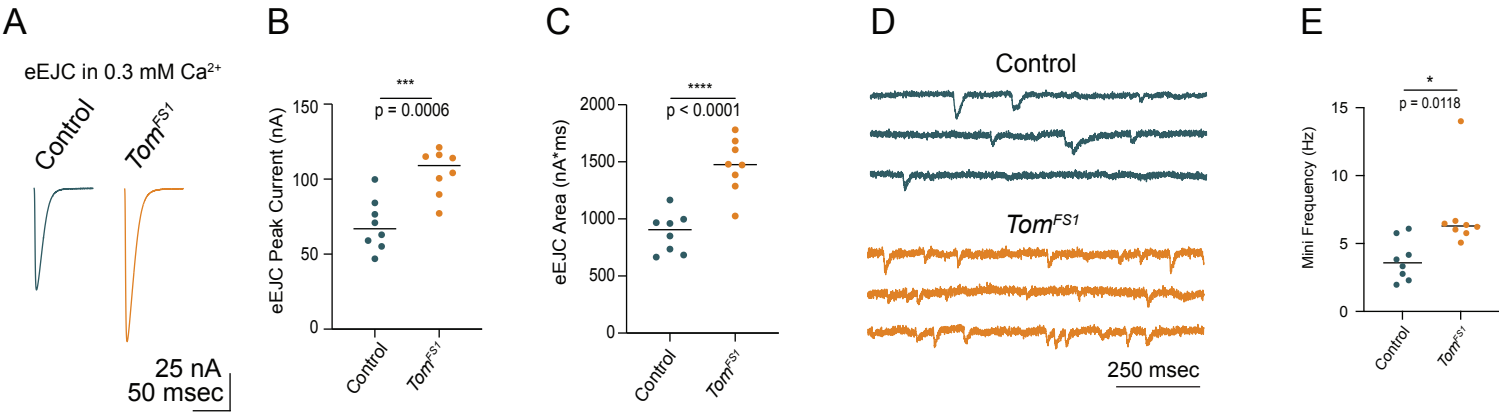

Supplement: supp [file elife-72841-supp-v1.zip]

Figure 3 - supplemental figure 1

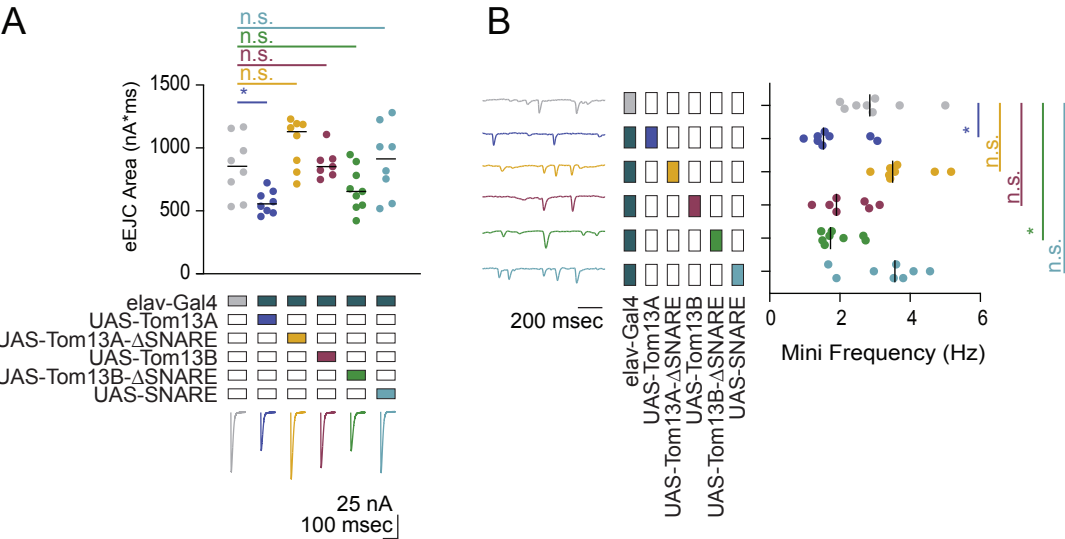

Supplement: supp [file elife-72841-supp-v1.zip › elife_poa_e72841_Figure_3_figure_supplement_1.pdf]

Figure 4 - supplemental figure 1

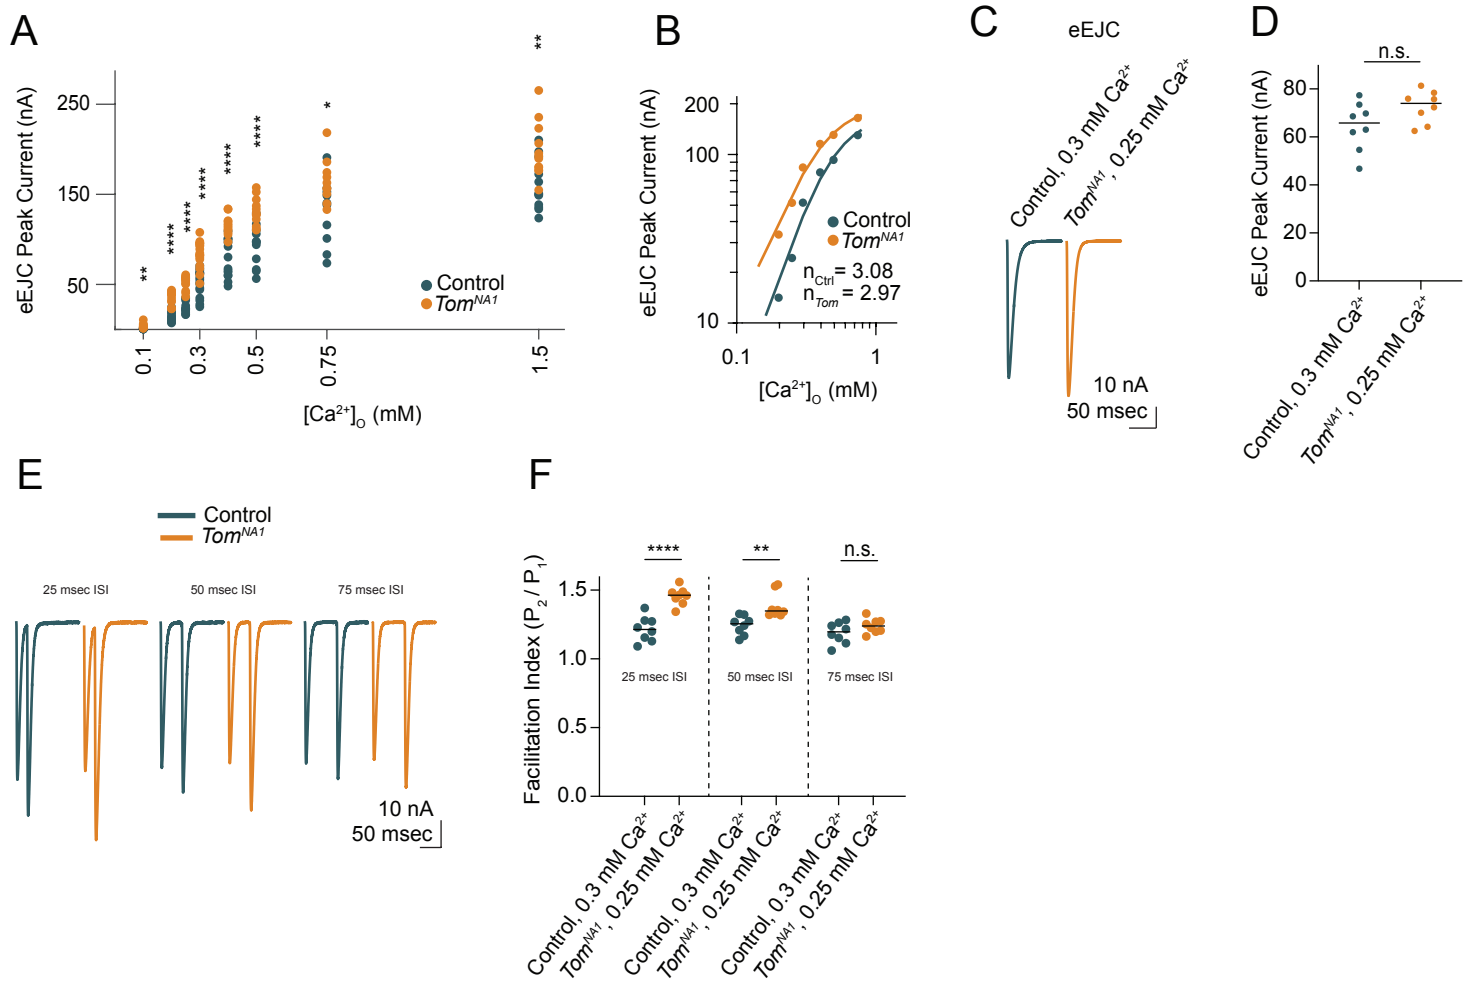

Supplement: supp [file elife-72841-supp-v1.zip › elife_poa_e72841_Figure_4_figure_supplement_1.pdf]

Figure 7 - supplemental figure 1

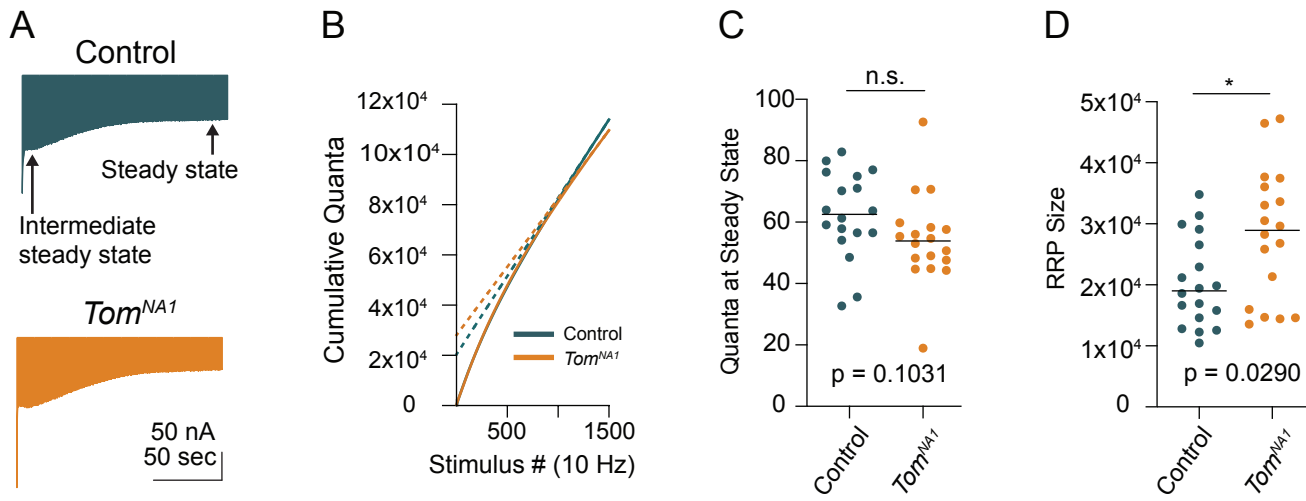

Supplement: supp [file elife-72841-supp-v1.zip › elife_poa_e72841_Figure_7_figure_supplement_1.pdf]

Figure 8 - supplemental figure 1

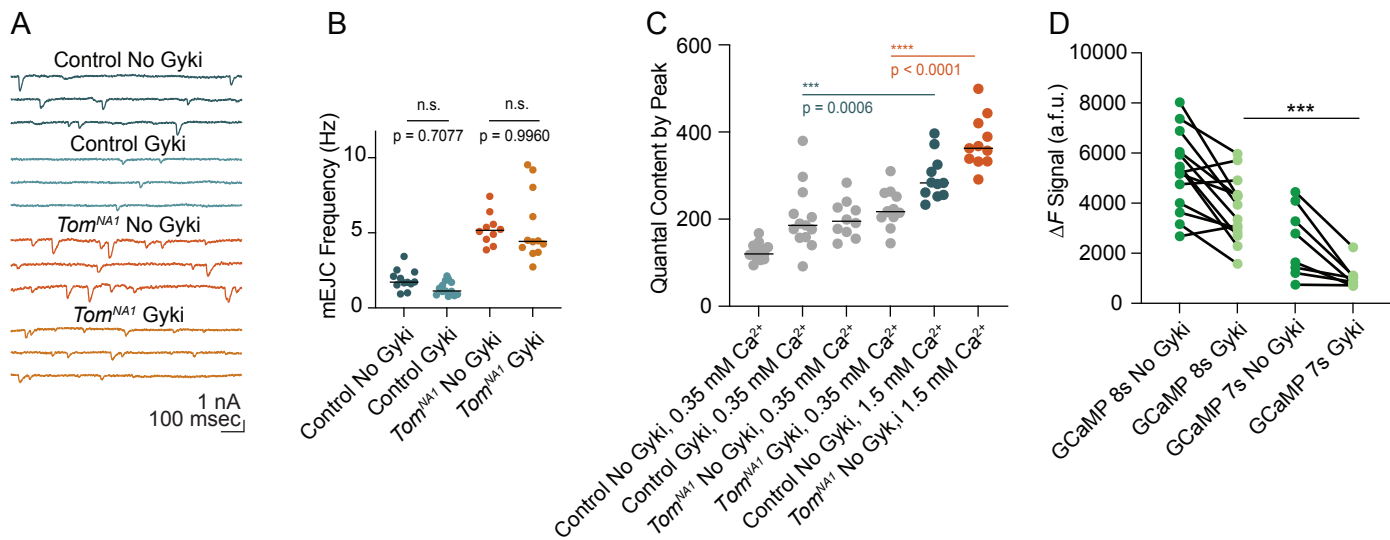

Supplement: supp [file elife-72841-supp-v1.zip › elife_poa_e72841_Figure_8_figure_supplement_1.pdf]

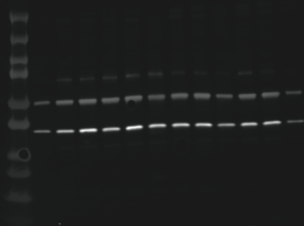

Supplement: supp [file elife-72841-supp-v1.zip › elife_poa_e72841_Figure_1_source_data_2.pdf]

Tom<sup>NA1</sup>

Control

Analyzed lanes

Displayed image

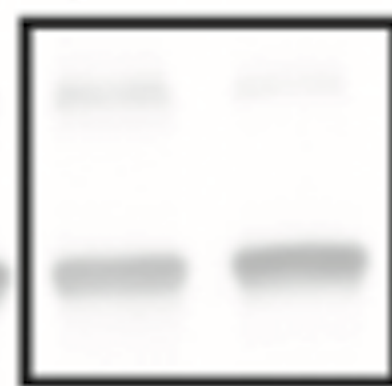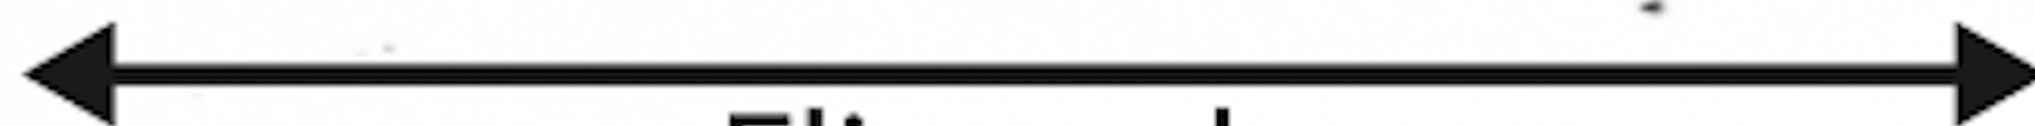

Flipped

Supplement: supp [file elife-72841-supp-v1.zip › elife_poa_e72841_Figure_1_source_data_3.pdf]
